# Supplementary material for: FeCl3-catalyzed regioselective ring-opening of aryl oxirane with 4-hydroxycoumarin for the synthesis of furo[3,2-c]coumarins
Source: Royal Society of Chemistry journal article supplement (doi:10.1039/d3ob01721d), 2023-11-22

### Electronic Supporting Information

## Title: FeCl<sub>3</sub> catalyzed regioselective ring-opening of aryl oxirane with 4-hydroxycoumarin for the synthesis of furo[3,2-*c*]coumarins

Simra Faraz, Ahmad Ali and Abu Taleb Khan\*

*<sup>a</sup>Department of Chemistry, Indian Institute of Guwahati, Guwahati 781039, Assam, India.*

Tel.: +91 361 2582305. Fax: +91 361 2582349

E-mail: [atk@iitg.ac.in](mailto:atk@iitg.ac.in)

### Table of content

|                                                                                          |        |
|------------------------------------------------------------------------------------------|--------|
| Title of the Manuscript                                                                  | S1     |
| X-ray crystallographic data of compound <b>3h</b>                                        | S1-S2  |
| Copies of <sup>1</sup> H NMR, <sup>13</sup> C NMR, and HRMS spectra of all the compounds | S3-S95 |

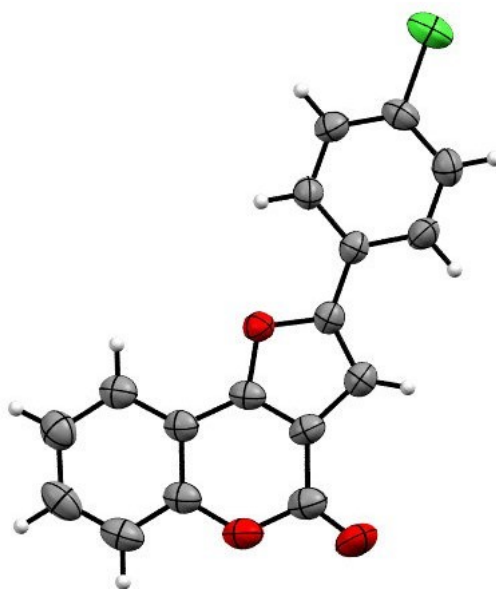

Figure S1. ORTEP Diagrams of compound **3h**.

Table S1. Crystal data and structure refinement for compound **3h**

| Entry | Identification Code   | Compound <b>3h</b>                                    |
|-------|-----------------------|-------------------------------------------------------|
| 01    | Empirical formula     | C <sub>17</sub> H <sub>9</sub> ClO <sub>3</sub>       |
| 02    | Formula weight        | 296.69                                                |
| 03    | Temperature           | 297.00                                                |
| 04    | Wavelength            | 0.71073 Å                                             |
| 05    | Radiation type        | MoKα                                                  |
| 06    | Radiation system      | Fine-focus sealed tube                                |
| 07    | Crystal system        | orthorhombic                                          |
| 08    | Space group           | Pna2 <sub>1</sub>                                     |
| 09    | Cell length           | a= 25.055(6) /Å b=<br>3.8926(9) /Å c= 13.226(3)<br>/Å |
| 10    | Cell angle            | α=90<br>β=90(2)<br>γ=90                               |
| 11    | Cell volume           | 1290.0(5)                                             |
| 12    | Density               | 1.528                                                 |
| 13    | Completeness to theta | 99                                                    |
| 14    | Absorption correction | multi-scan                                            |
| 15    | Refinement method     | Full-matrix least-squares on<br>F <sup>2</sup>        |
| 16    | Index ranges          | -30 ≤ h ≤ 30,<br>-4 ≤ k ≤ 4,<br>-16 ≤ l ≤ 16          |
| 17    | Reflection number     | 2527                                                  |
| 18    | 2θ range              | 4.478 to 51.982                                       |
| 19    | Cell formula units Z  | 4                                                     |
| 20    | CCDC no               | 2286699                                               |

# <sup>1</sup>H NMR Spectrum of 8-Methyl-2-phenyl-4H-furo[3,2-c]chromen-4-one (3a)

SF-REV-26-1H.3.fid - 1H

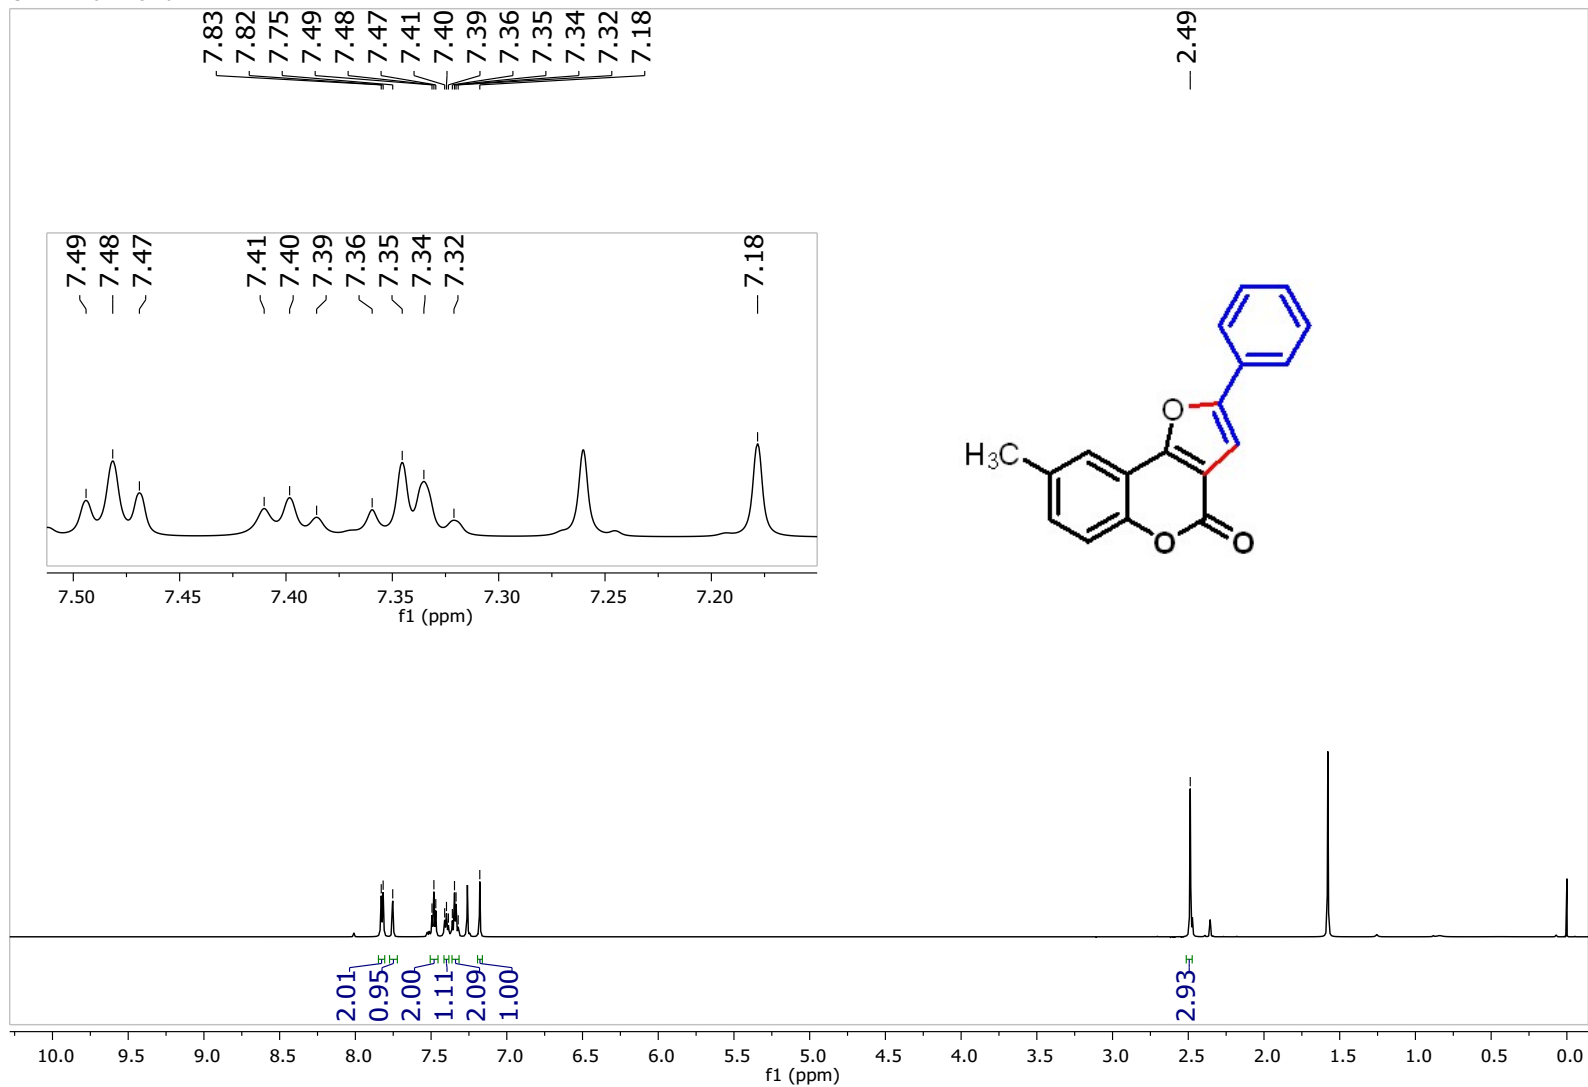

**<sup>13</sup>C NMR Spectrum of 8-Methyl-2-phenyl-4*H*-furo[3,2-*c*]chromen-4-one (3a)**

SF-4OHM-ST-13C.4.fid — 13C

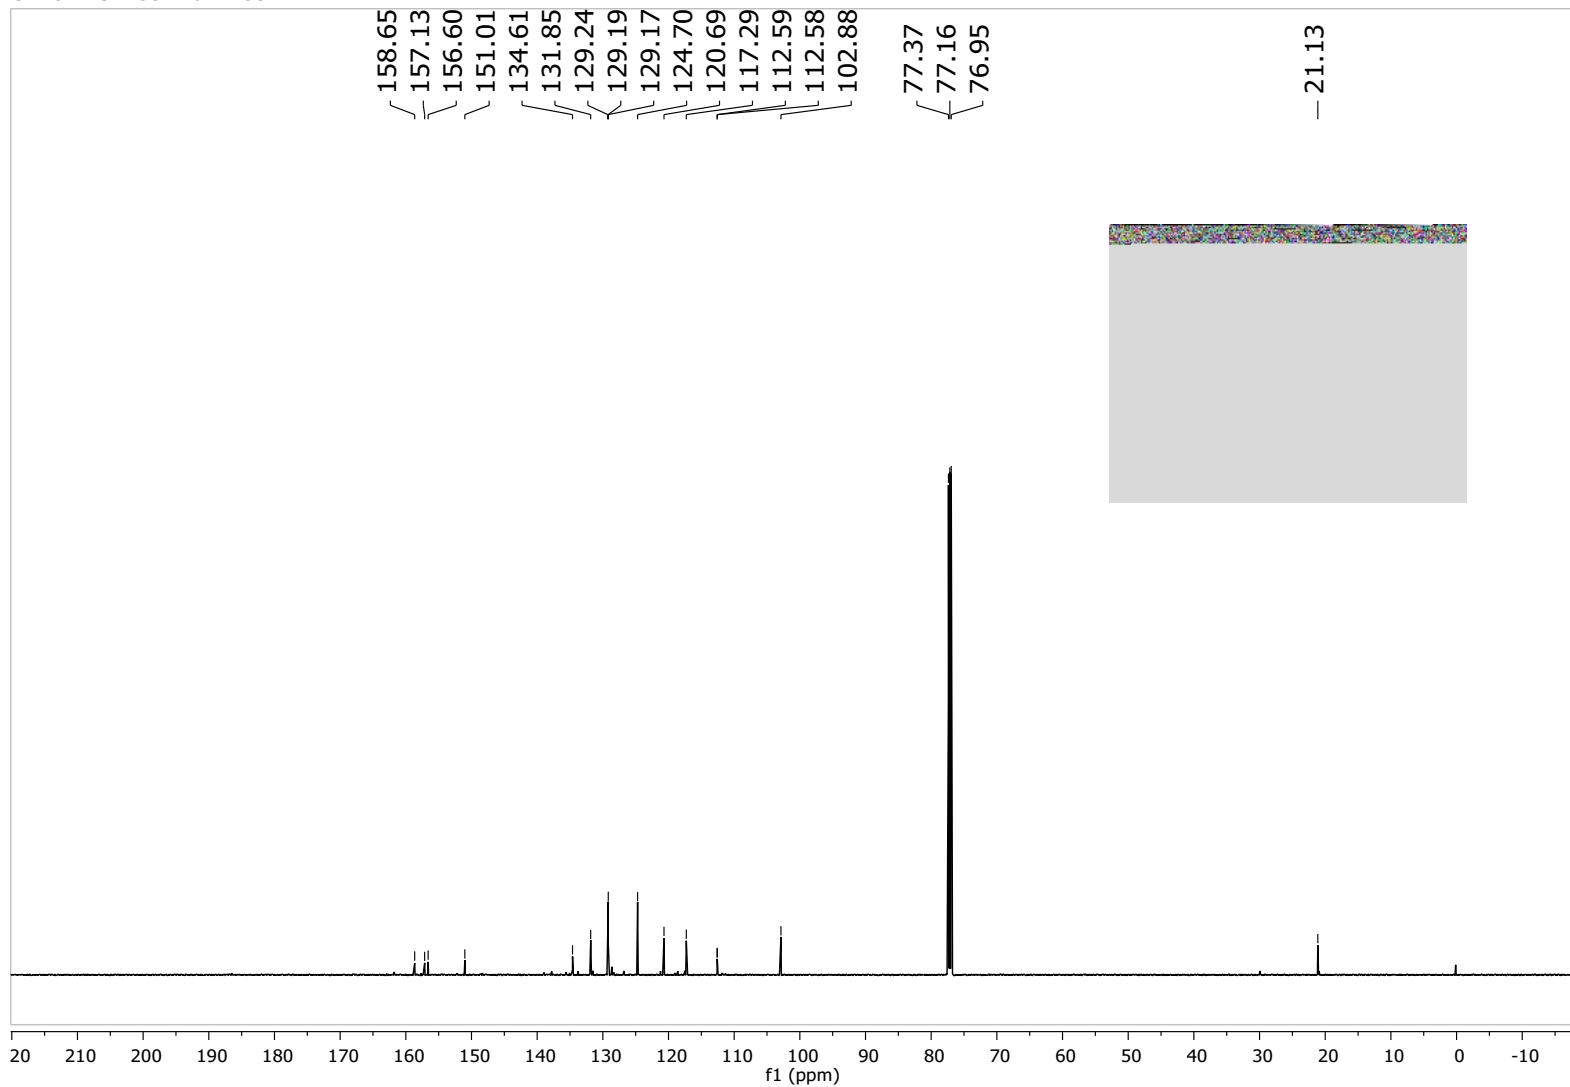

# HRMS Spectrum of 8-Methyl-2-phenyl-4*H*-furo[3,2-*c*]chromen-4-one (3a)

|             |                                 |                        |         |                 |                                 |
|-------------|---------------------------------|------------------------|---------|-----------------|---------------------------------|
| Sample Name | Sample22                        | Position               | P1-B11  | Instrument Name | QTOF                            |
| User Name   | SYSTEM (SYSTEM)                 | Inj Vol                | 5       | InjPosition     |                                 |
| Sample Type | Sample                          | IRM Calibration Status | Success | Data Filename   | SKF282.d                        |
| ACQ Method  | DIRECT MASS_POSITIVE_100_1500.m | Comment                |         | Acquired Time   | 30-06-2023 10:40:09 (UTC+05:30) |

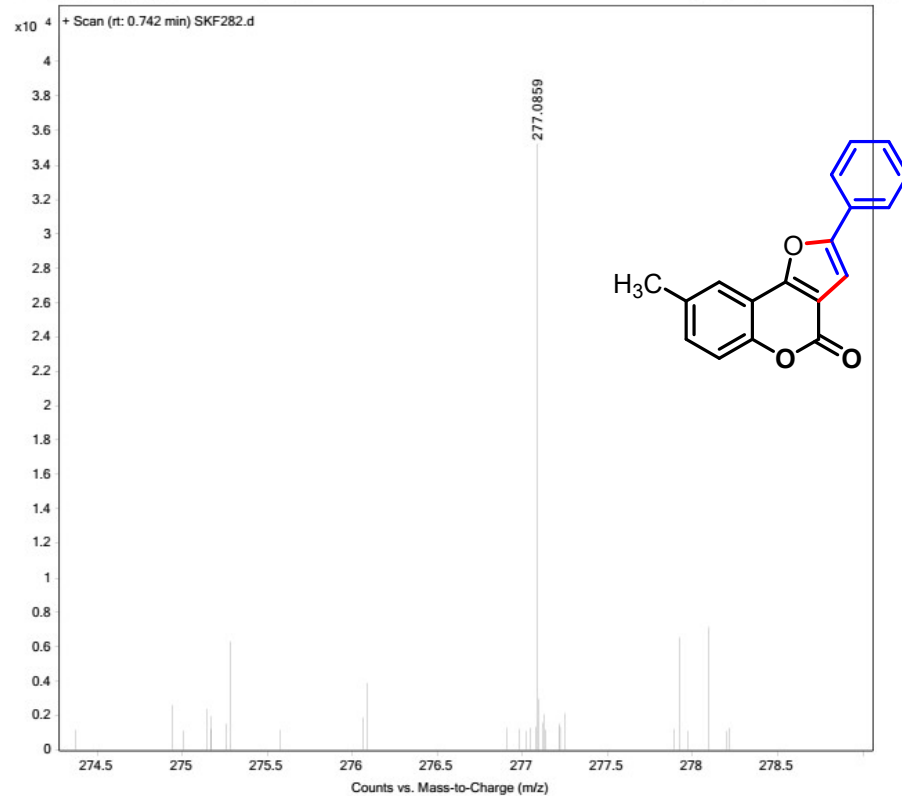

# <sup>1</sup>H NMR Spectrum of 2-(4-Fluorophenyl)-8-methyl-4H-furo[3,2-c]chromen-4-one (3b)

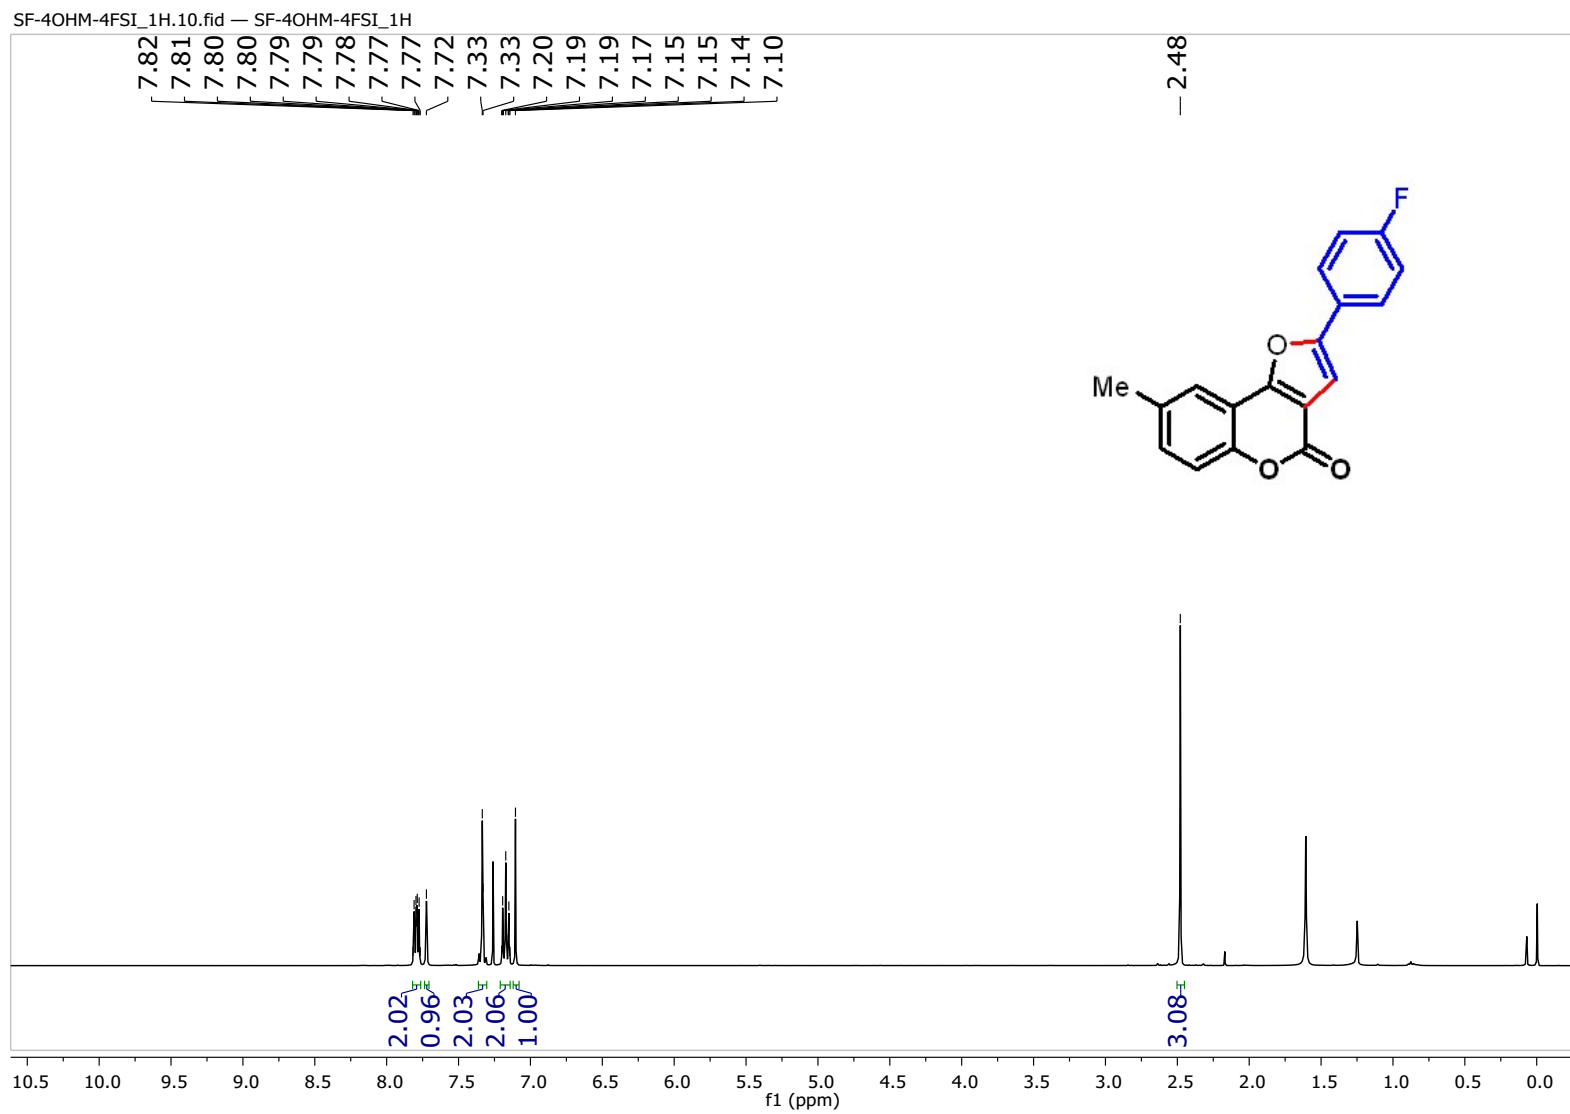

**<sup>13</sup>C NMR Spectrum of 2-(4-Fluorophenyl)-8-methyl-4H-furo[3,2-c]chromen-4-one (3b)**

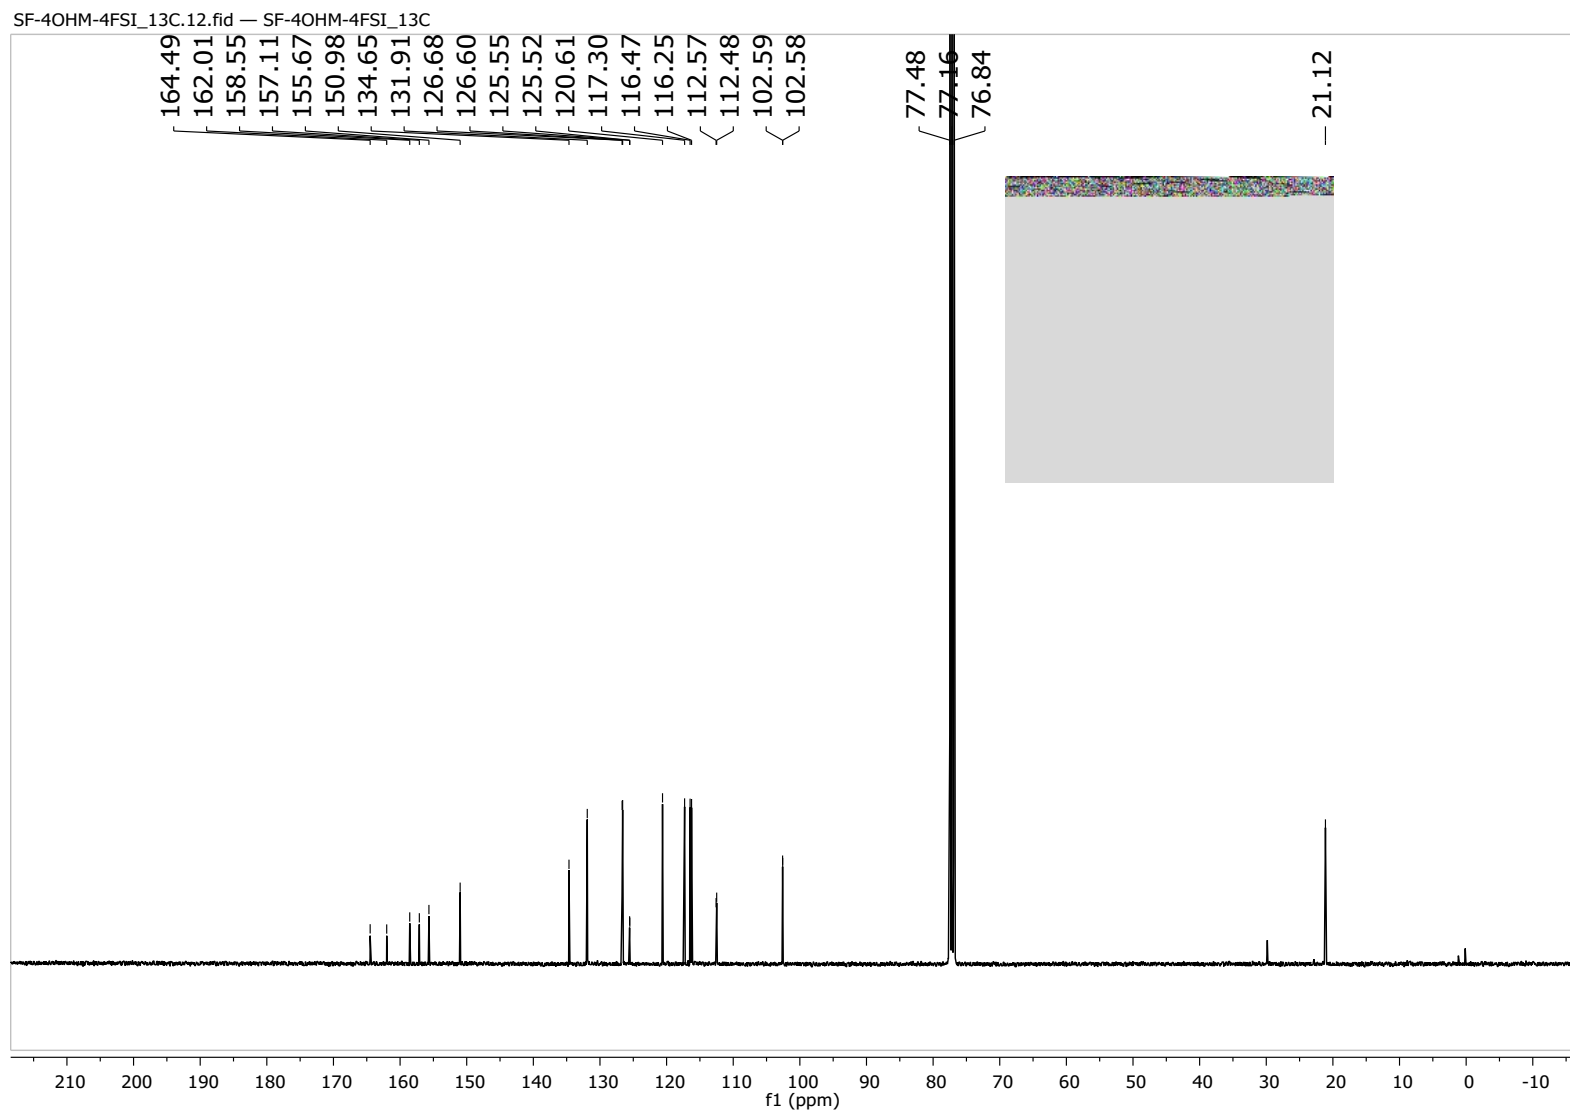

**<sup>19</sup>F NMR Spectrum of 2-(4-Fluorophenyl)-8-methyl-4*H*-furo[3,2-*c*]chromen-4-one (3b)**

SF-4OHM-4FSI\_19F.14.fid — SF-4OHM-4FSI\_19F

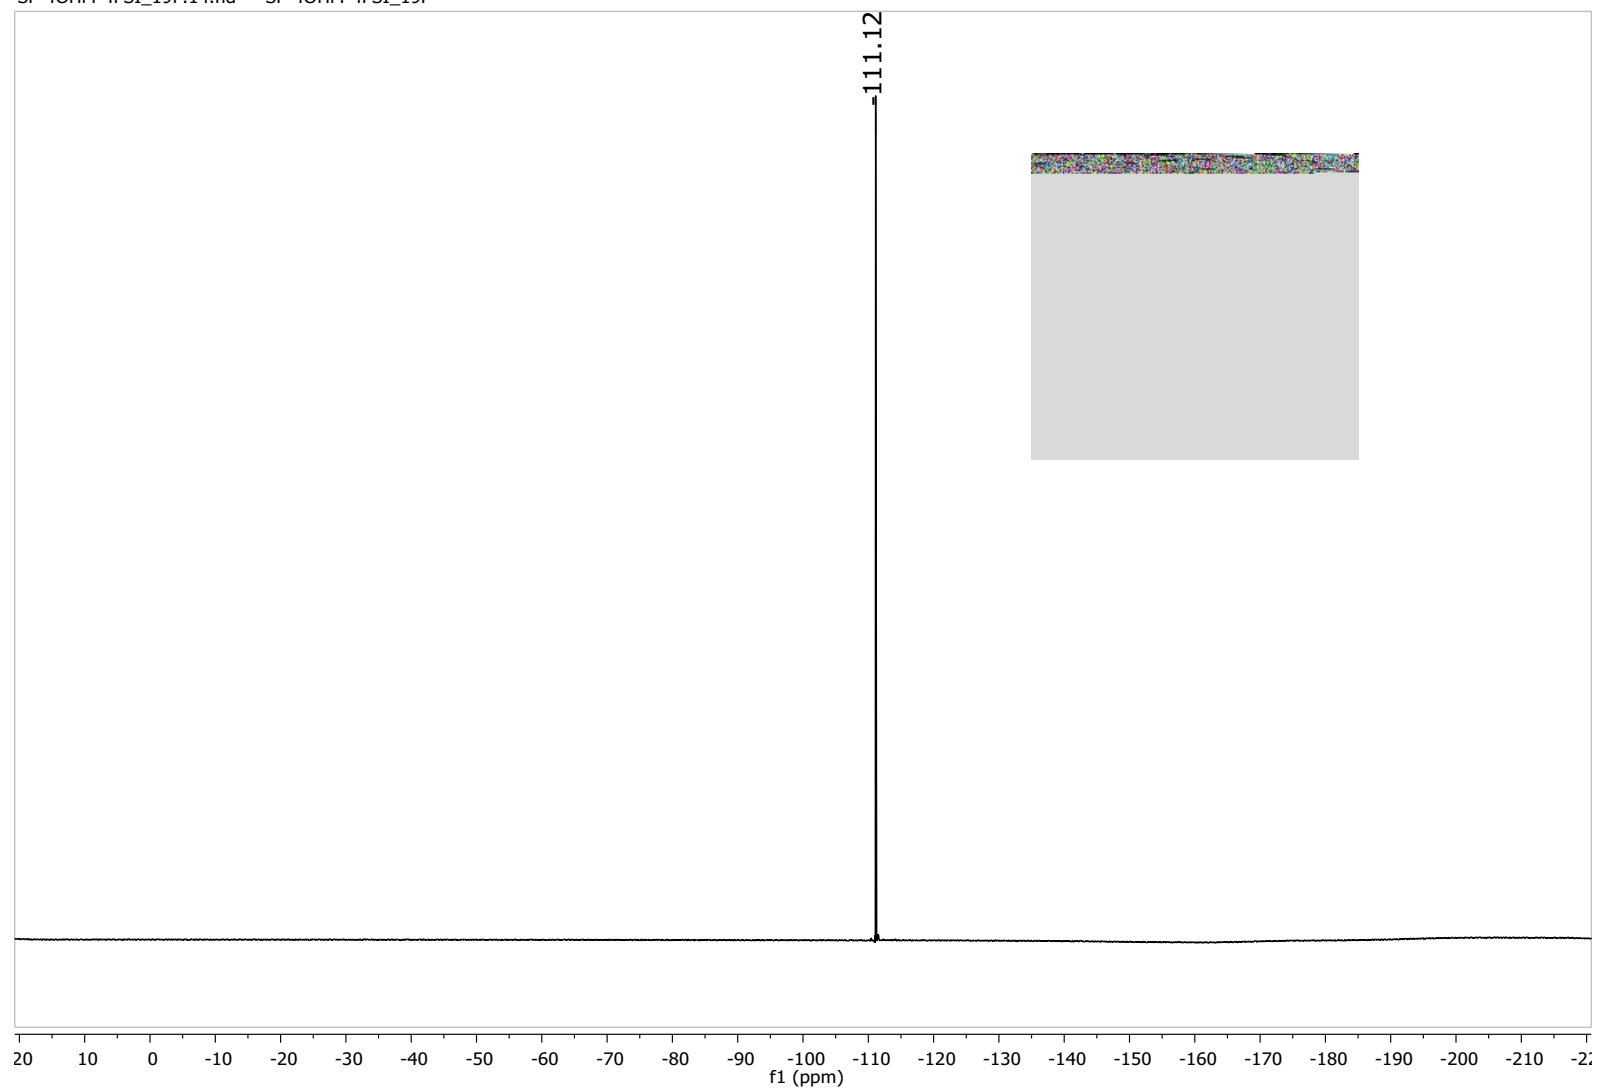



## HRMS Spectrum of 2-(4-Fluorophenyl)-8-methyl-4H-furo[3,2-c]chromen-4-one (3b)

|                    |                                 |                               |         |                        |                                 |
|--------------------|---------------------------------|-------------------------------|---------|------------------------|---------------------------------|
| <b>Sample Name</b> | Sample10                        | <b>Position</b>               | P1-A9   | <b>Instrument Name</b> | QTOF                            |
| <b>User Name</b>   | SYSTEM (SYSTEM)                 | <b>Inj Vol</b>                | 5       | <b>InjPosition</b>     |                                 |
| <b>Sample Type</b> | Sample                          | <b>IRM Calibration Status</b> | Success | <b>Data Filename</b>   | sf6324.d                        |
| <b>ACQ Method</b>  | DIRECT MASS_POSITIVE_100_1500.m | <b>Comment</b>                |         | <b>Acquired Time</b>   | 12-07-2023 15:12:40 (UTC+05:30) |

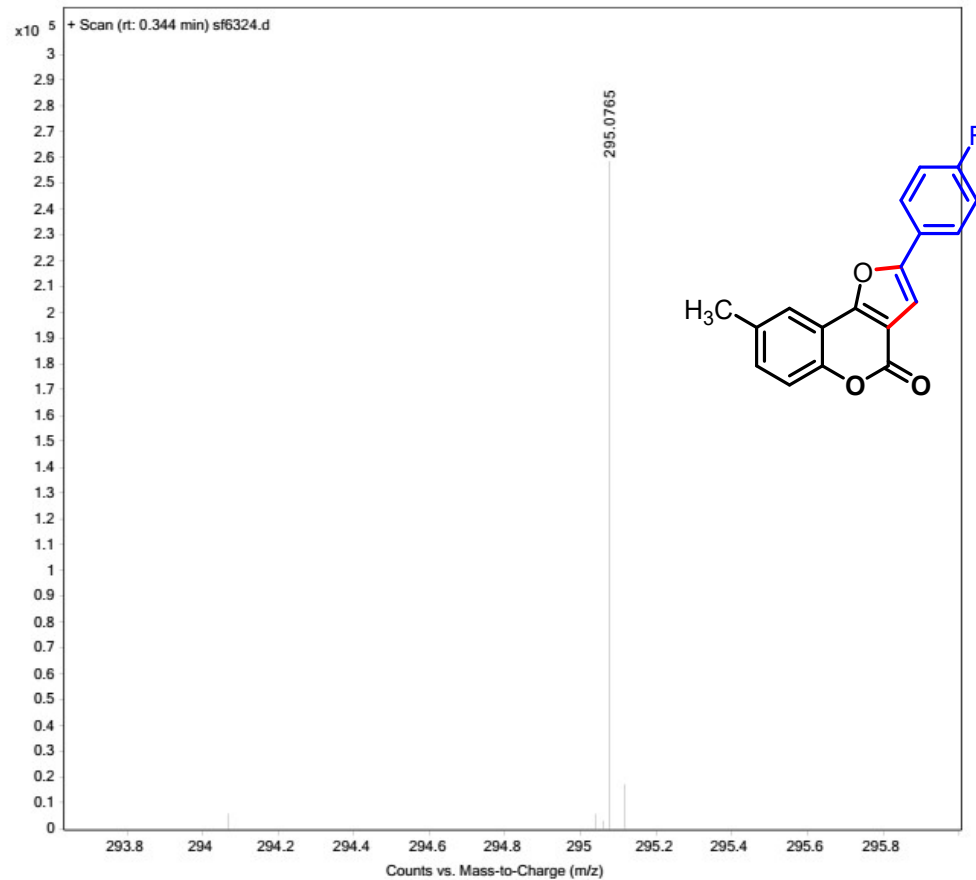

# <sup>1</sup>H NMR Spectrum of 2-(4-Chlorophenyl)-8-methyl-4H-furo[3,2-c]chromen-4-one (3c)

SF-40H-CLST-U-1H.1.fid — 1H

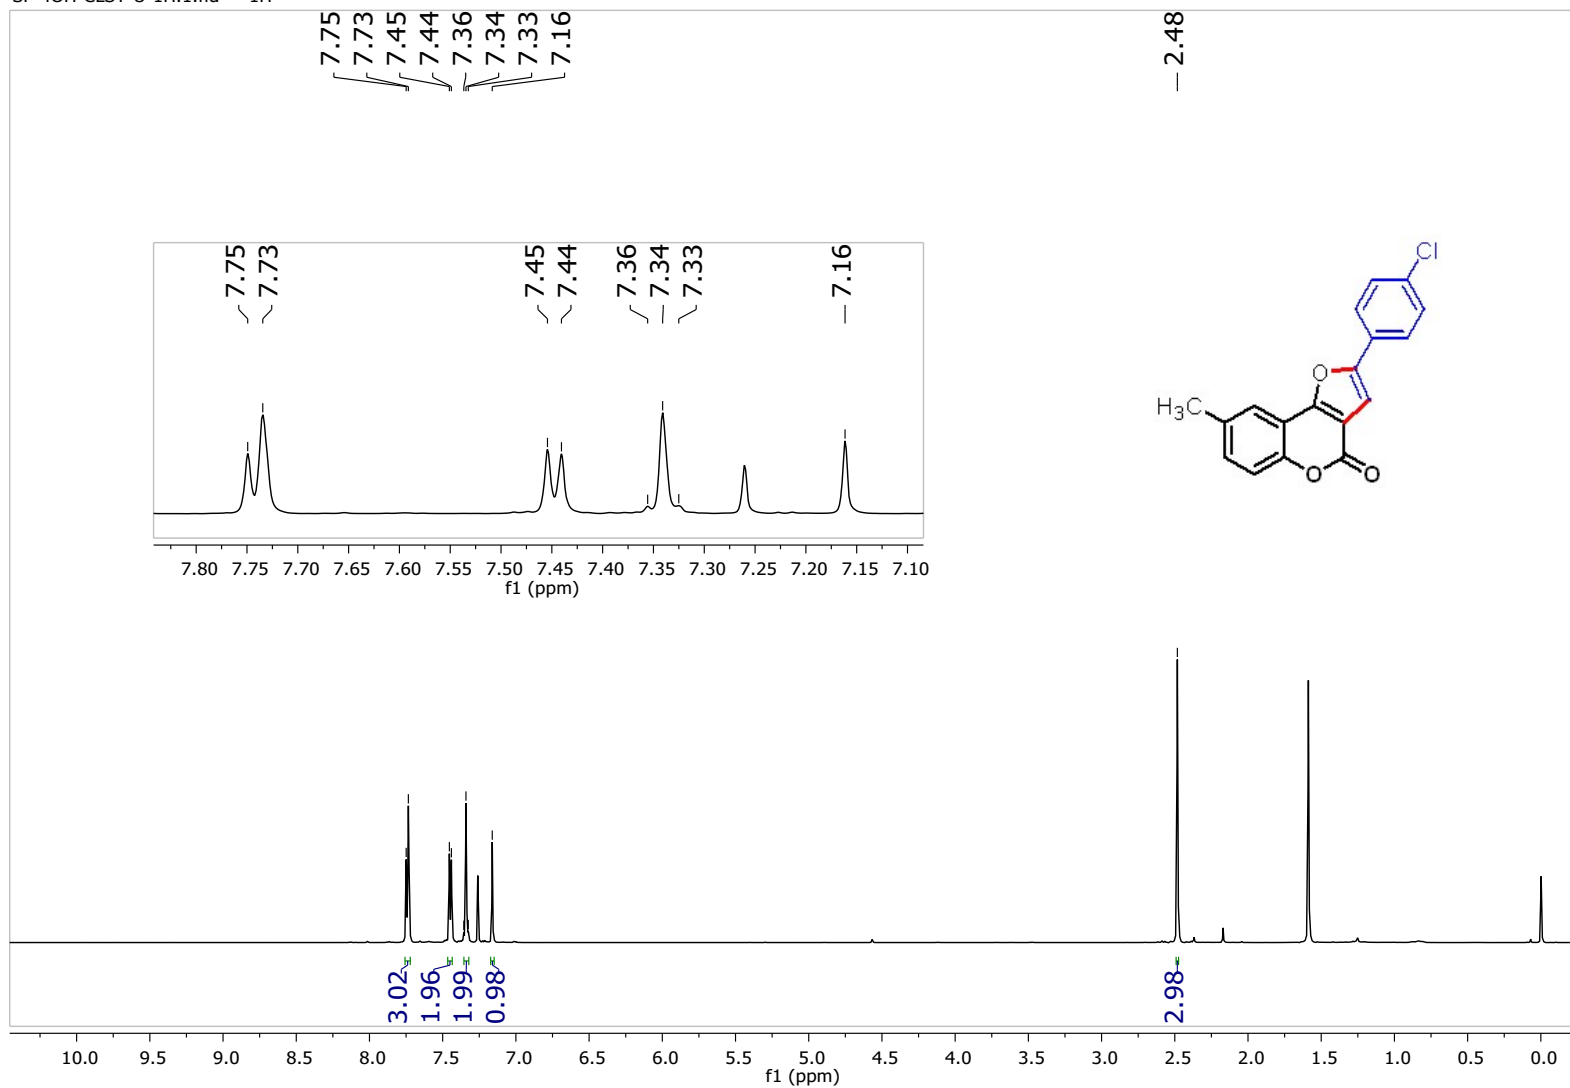

**<sup>13</sup>C NMR Spectrum of 2-(4-Chlorophenyl)-8-methyl-4H-furo[3,2-c]chromen-4-one (3c)**

SF-40H-CLST-U-13C.1.fid — 13C

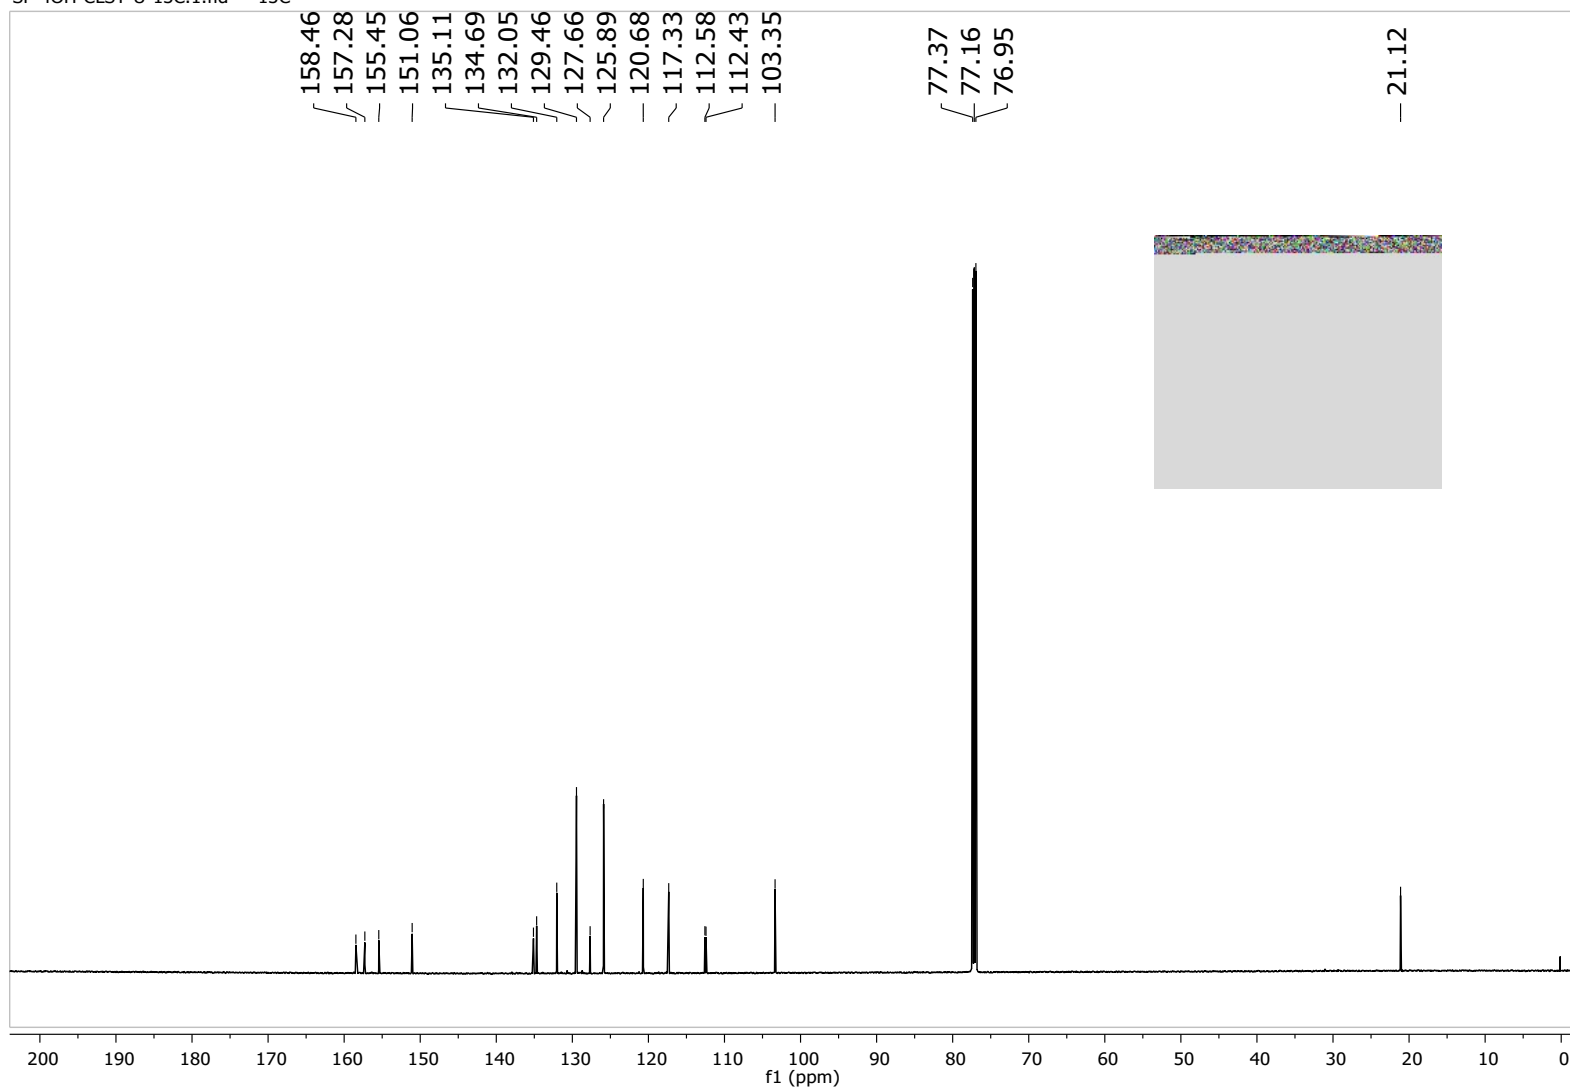

## HRMS Spectrum of 2-(4-Chlorophenyl)-8-methyl-4H-furo[3,2-c]chromen-4-one (3c)

|                    |                             |                               |         |                        |                                 |
|--------------------|-----------------------------|-------------------------------|---------|------------------------|---------------------------------|
| <b>Sample Name</b> |                             | <b>Position</b>               | P1-A10  | <b>Instrument Name</b> | QTOF                            |
| <b>User Name</b>   | SYSTEM (SYSTEM)             | <b>Inj Vol</b>                | 5       | <b>InjPosition</b>     |                                 |
| <b>Sample Type</b> | Sample                      | <b>IRM Calibration Status</b> | Success | <b>Data Filename</b>   | SF6-311.d                       |
| <b>ACQ Method</b>  | DIRECT MASS_POSITIVE_01_1.m | <b>Comment</b>                |         | <b>Acquired Time</b>   | 11-07-2023 17:15:37 (UTC+05:30) |

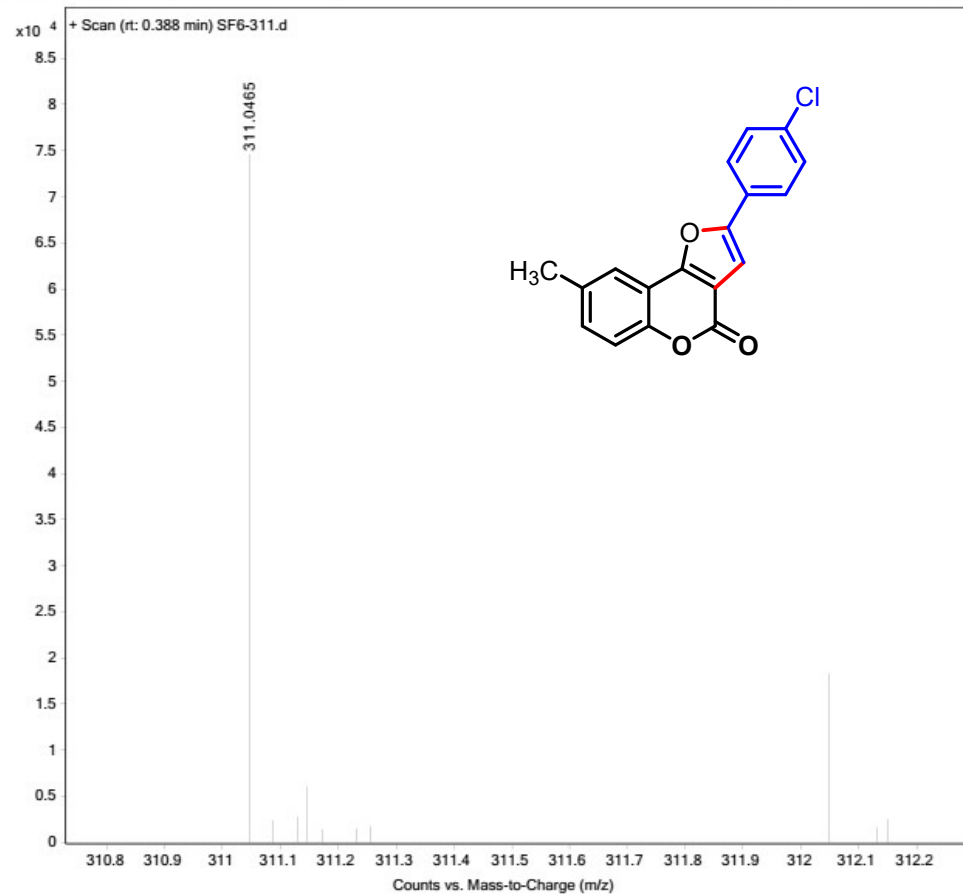

# <sup>1</sup>H NMR Spectrum of 8-Methyl-2-(*p*-tolyl)-4*H*-furo[3,2-*c*]chromen-4-one(3d)

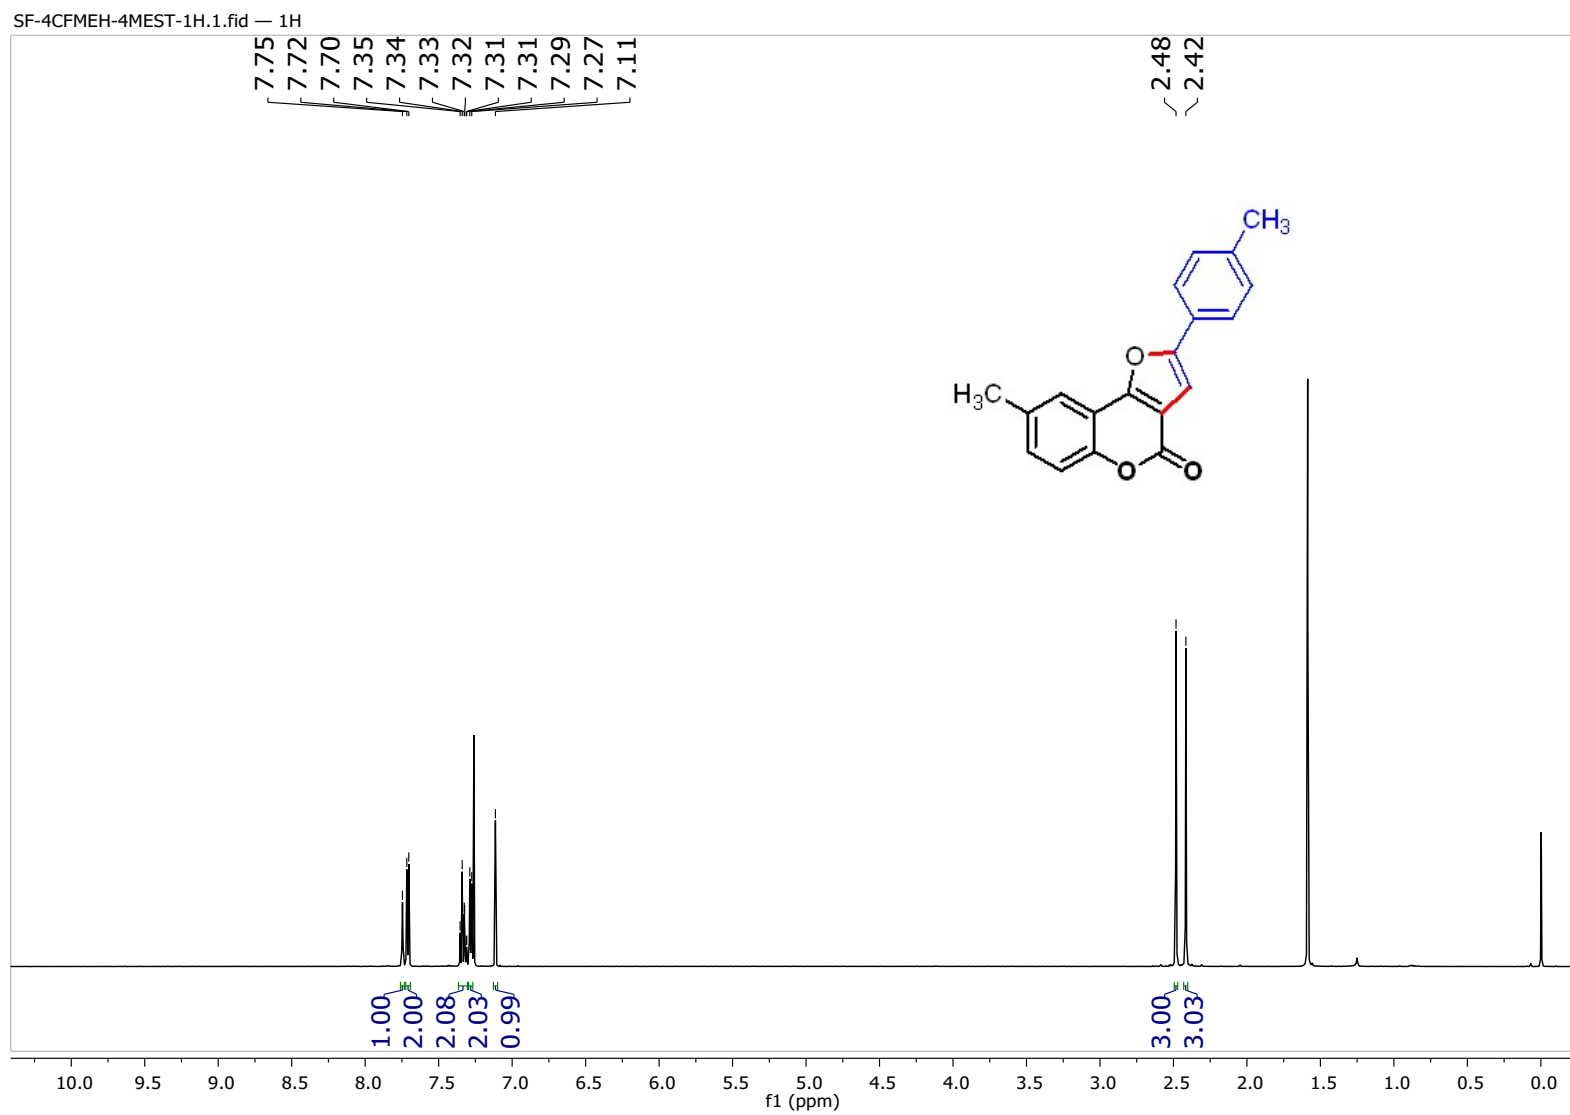

**<sup>13</sup>C NMR Spectrum of 8-Methyl-2-(*p*-tolyl)-4*H*-furo[3,2-*c*]chromen-4-one (3d)**

SF-4CF-MEH-4MEST-13C.1.fid — 13C

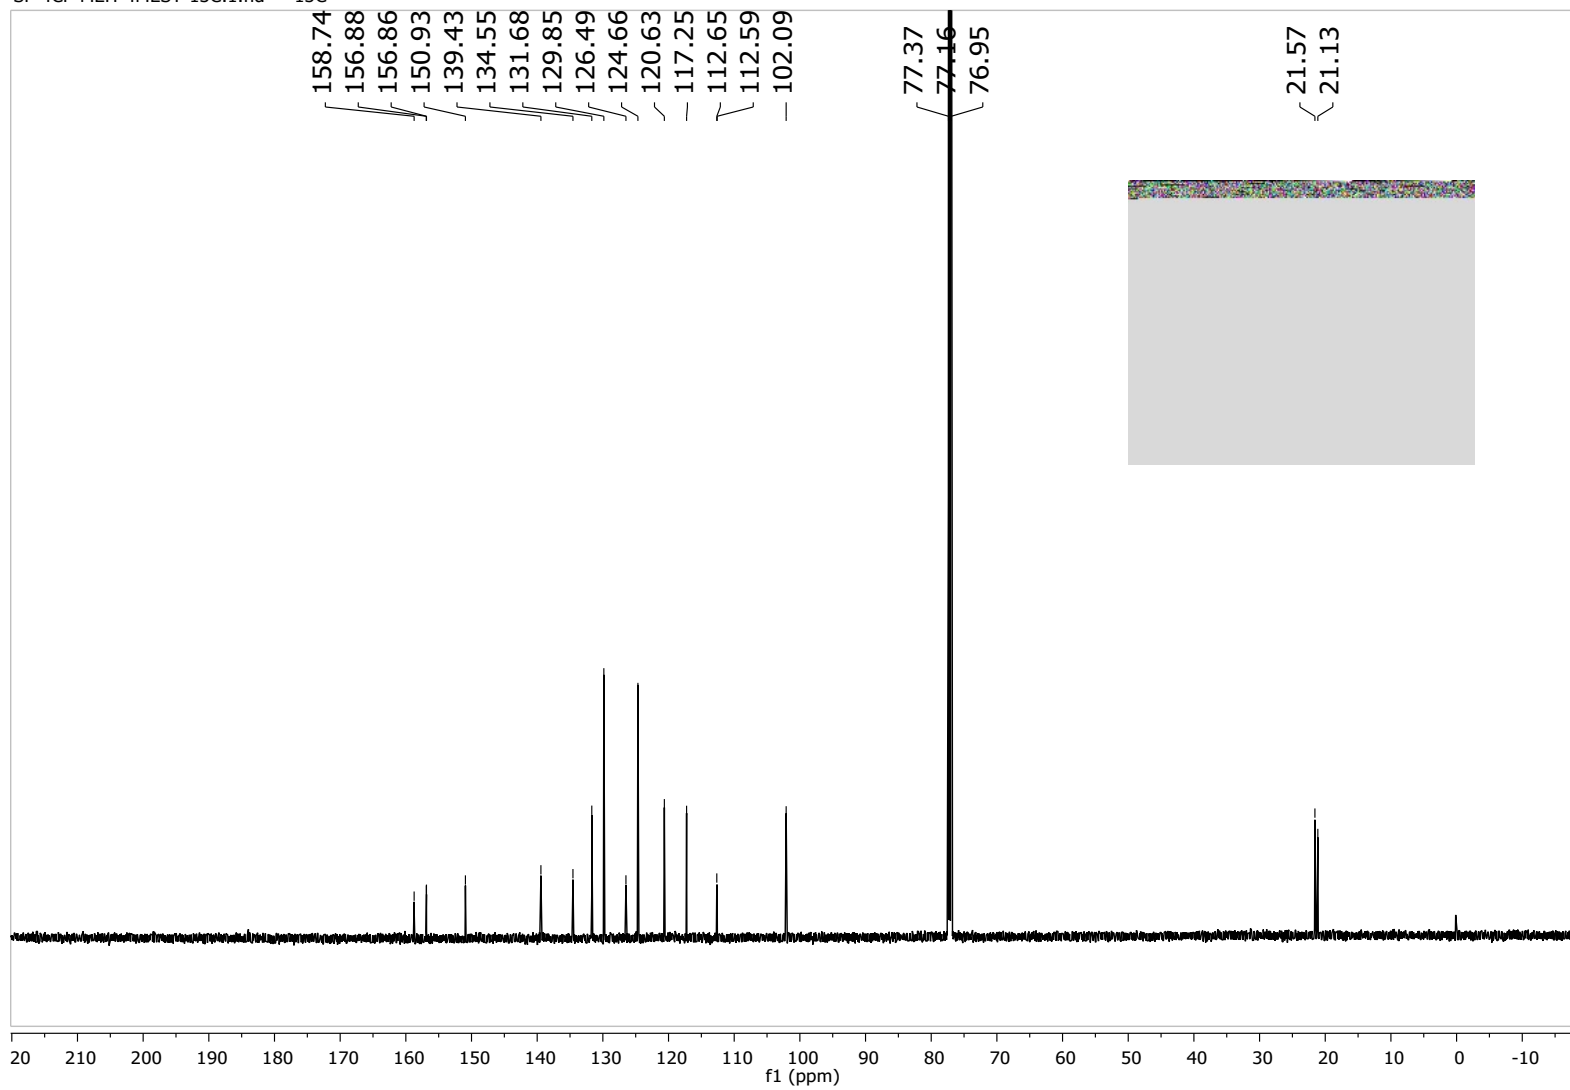

## HRMS Spectrum of 8-Methyl-2-(*p*-tolyl)-4*H*-furo[3,2-*c*]chromen-4-one (3d)

|             |                      |                        |         |                 |                                 |
|-------------|----------------------|------------------------|---------|-----------------|---------------------------------|
| Sample Name | SFK-EEB              | Position               | P2-D7   | Instrument Name | Instrument 1                    |
| User Name   |                      | Inj Vol                | 10      | InjPosition     |                                 |
| Sample Type | Sample               | IRM Calibration Status | Success | Data Filename   | SFK-EEB_021.d                   |
| ACQ Method  | FULL SCAN-POSITIVE.m | Comment                |         | Acquired Time   | 16-12-2022 18:31:59 (UTC+05:30) |

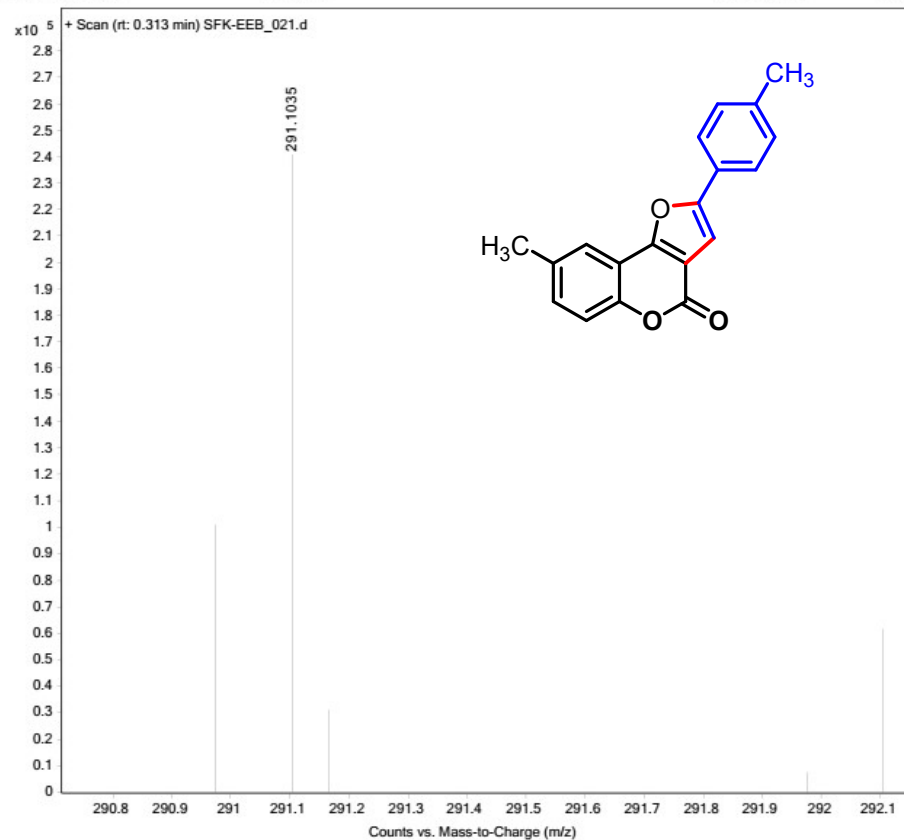

# <sup>1</sup>H NMR Spectrum of 8-Methyl-2-(*m*-tolyl)-4*H*-furo[3,2-*c*]chromen-4-one (3e)

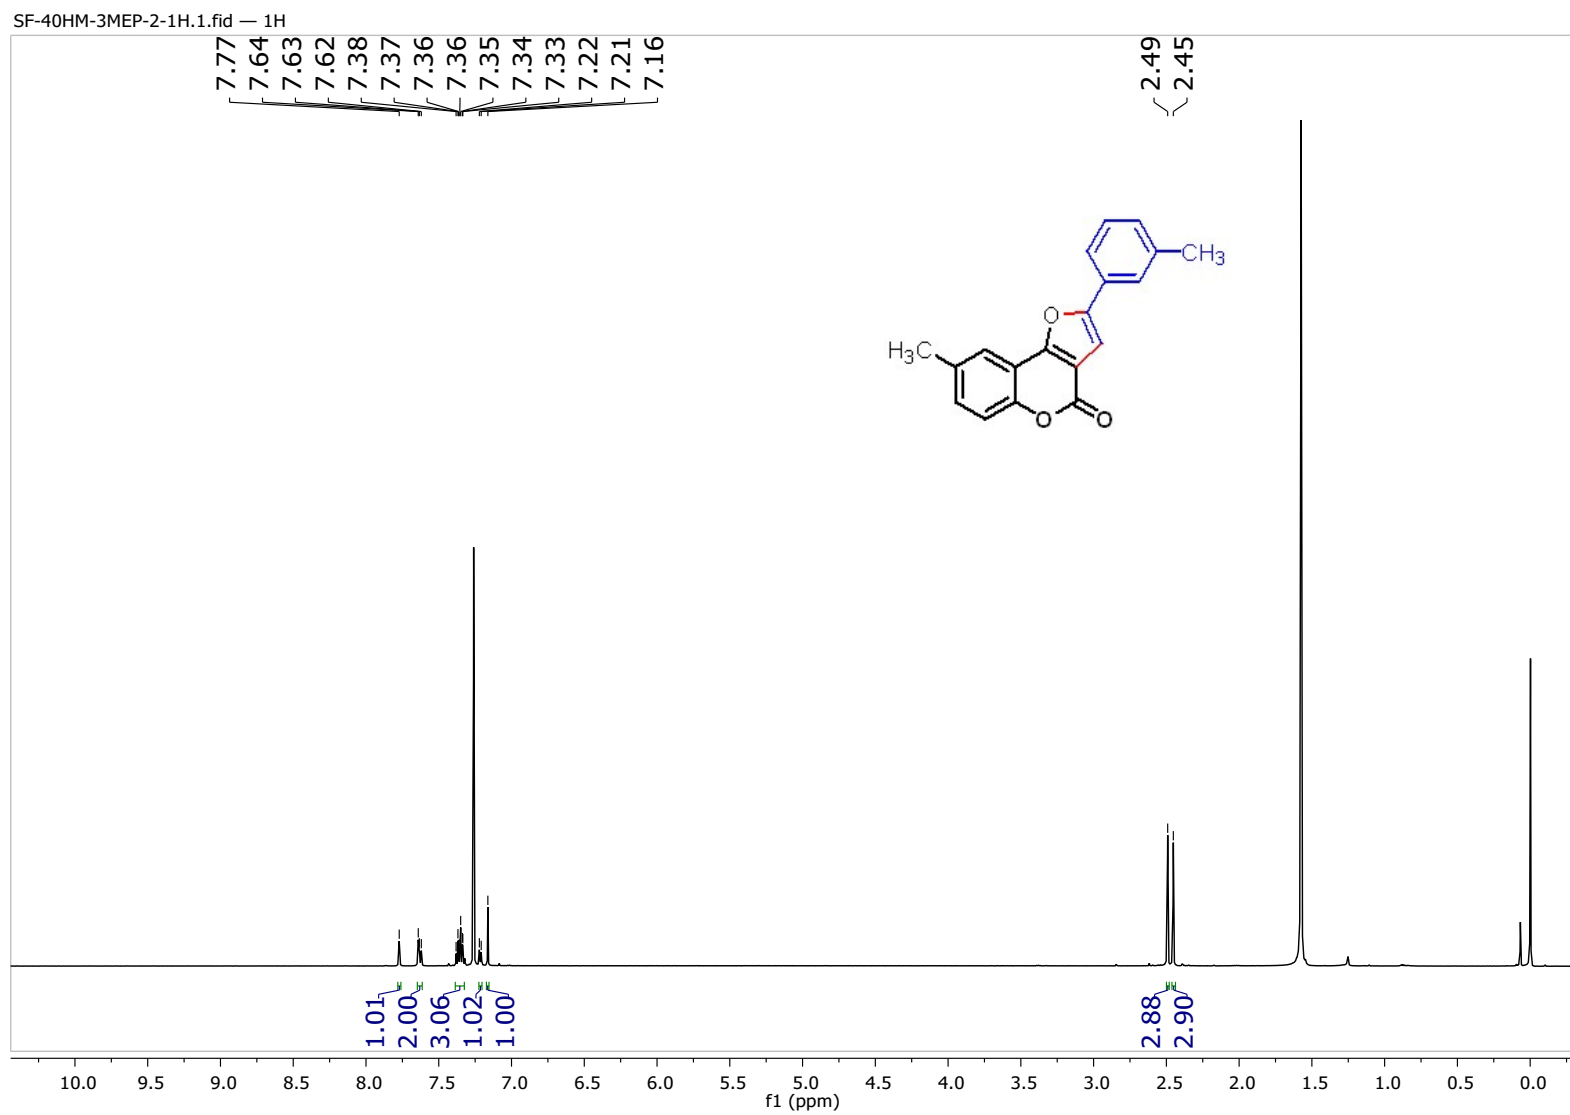



**<sup>13</sup>C NMR Spectrum of 8-Methyl-2-(*m*-tolyl)-4*H*-furo[3,2-*c*]chromen-4-one (3e)**

SF-4OH-M-3MEP-2\_13C.12.fid — SF-4OH-M-3MEP-2\_13C

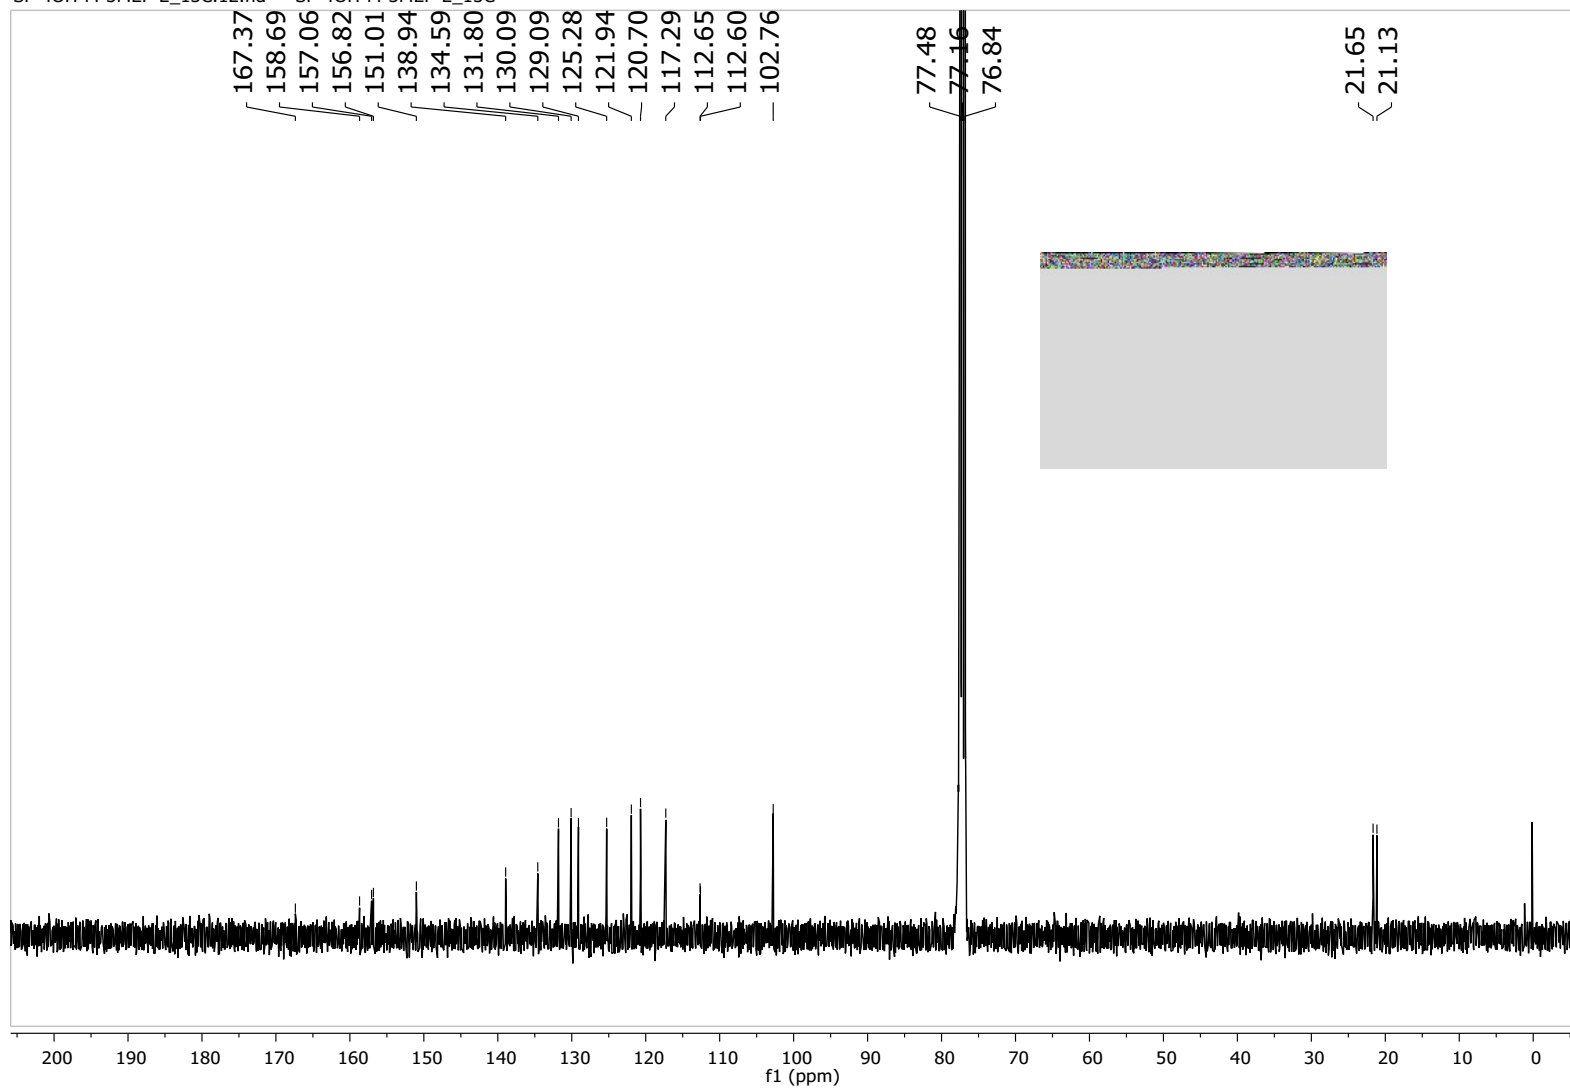

## HRMS Spectrum of 8-Methyl-2-(*m*-tolyl)-4*H*-furo[3,2-*c*]chromen-4-one (3e)

|             |                      |                        |         |                 |                                 |
|-------------|----------------------|------------------------|---------|-----------------|---------------------------------|
| Sample Name | SF-34-B              | Position               | P2-D1   | Instrument Name | Instrument 1                    |
| User Name   |                      | Inj Vol                | 10      | InjPosition     |                                 |
| Sample Type | Sample               | IRM Calibration Status | Success | Data Filename   | SF-34-B_013.d                   |
| ACQ Method  | FULL SCAN-POSITIVE.m | Comment                |         | Acquired Time   | 16-12-2022 18:19:16 (UTC+05:30) |

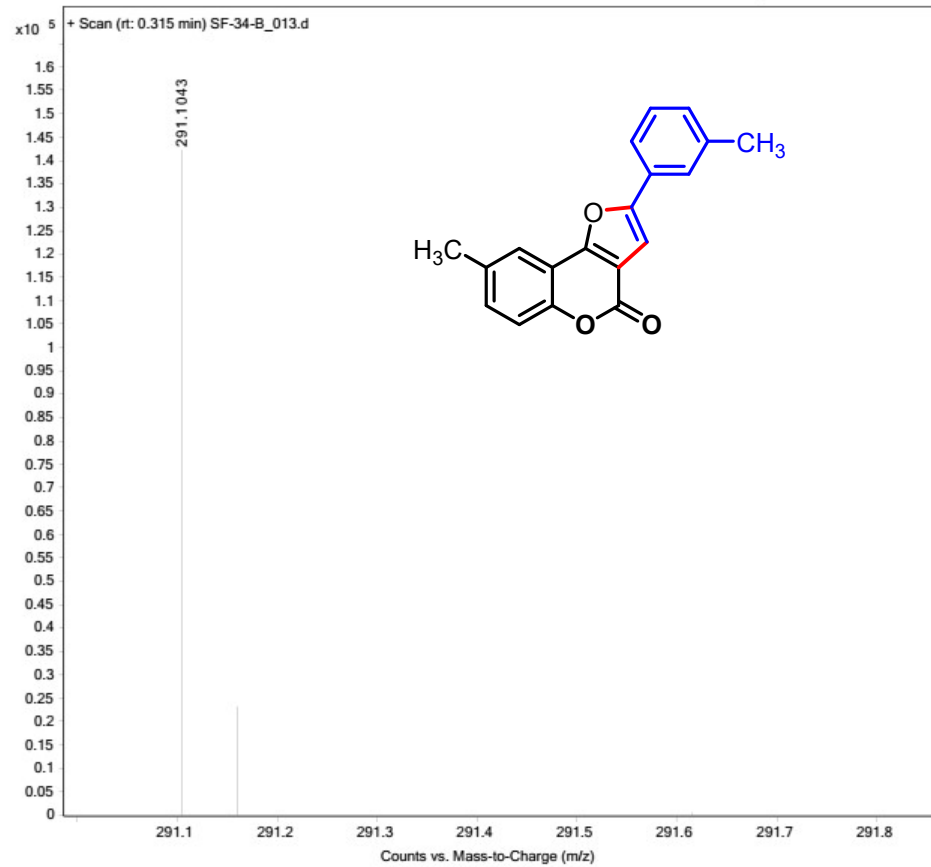

# <sup>1</sup>H NMR Spectrum of 2-Phenyl-4*H*-furo[3,2-*c*]chromen-4-one (3f)

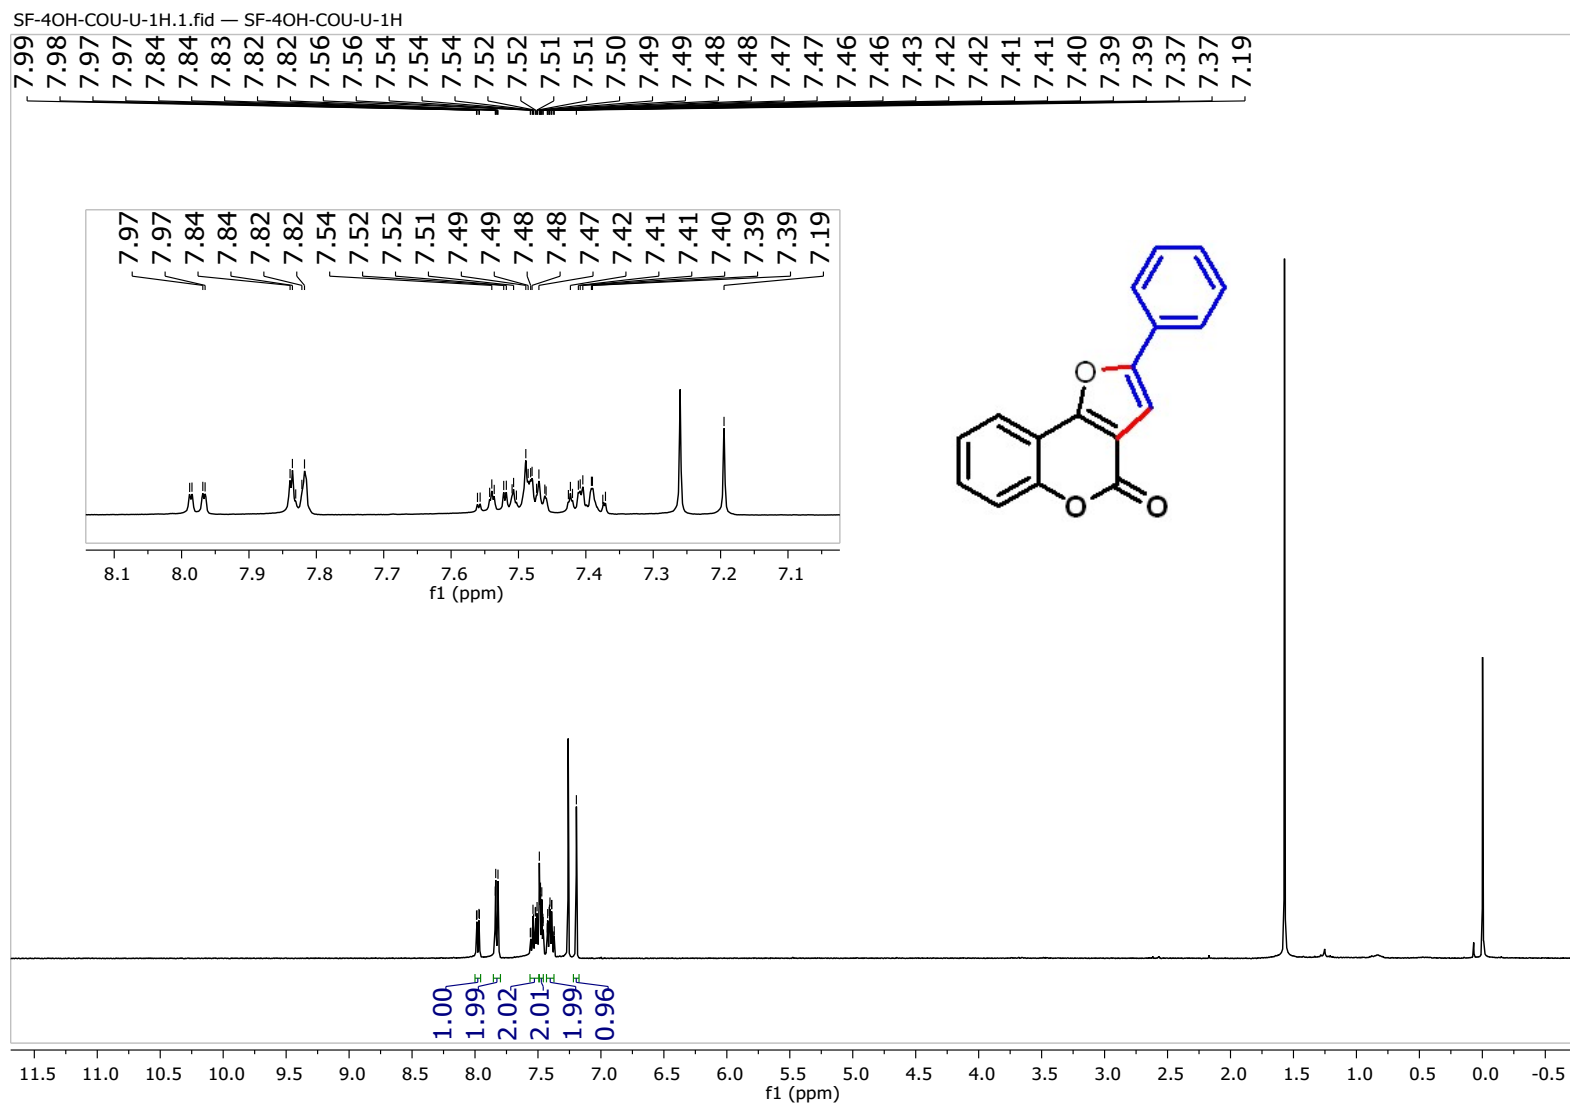

# <sup>13</sup>C NMR Spectrum of 2-Phenyl-4*H*-furo[3,2-*c*]chromen-4-one (3f)

SF-40HCOU-U-13C.1.fid — 13C

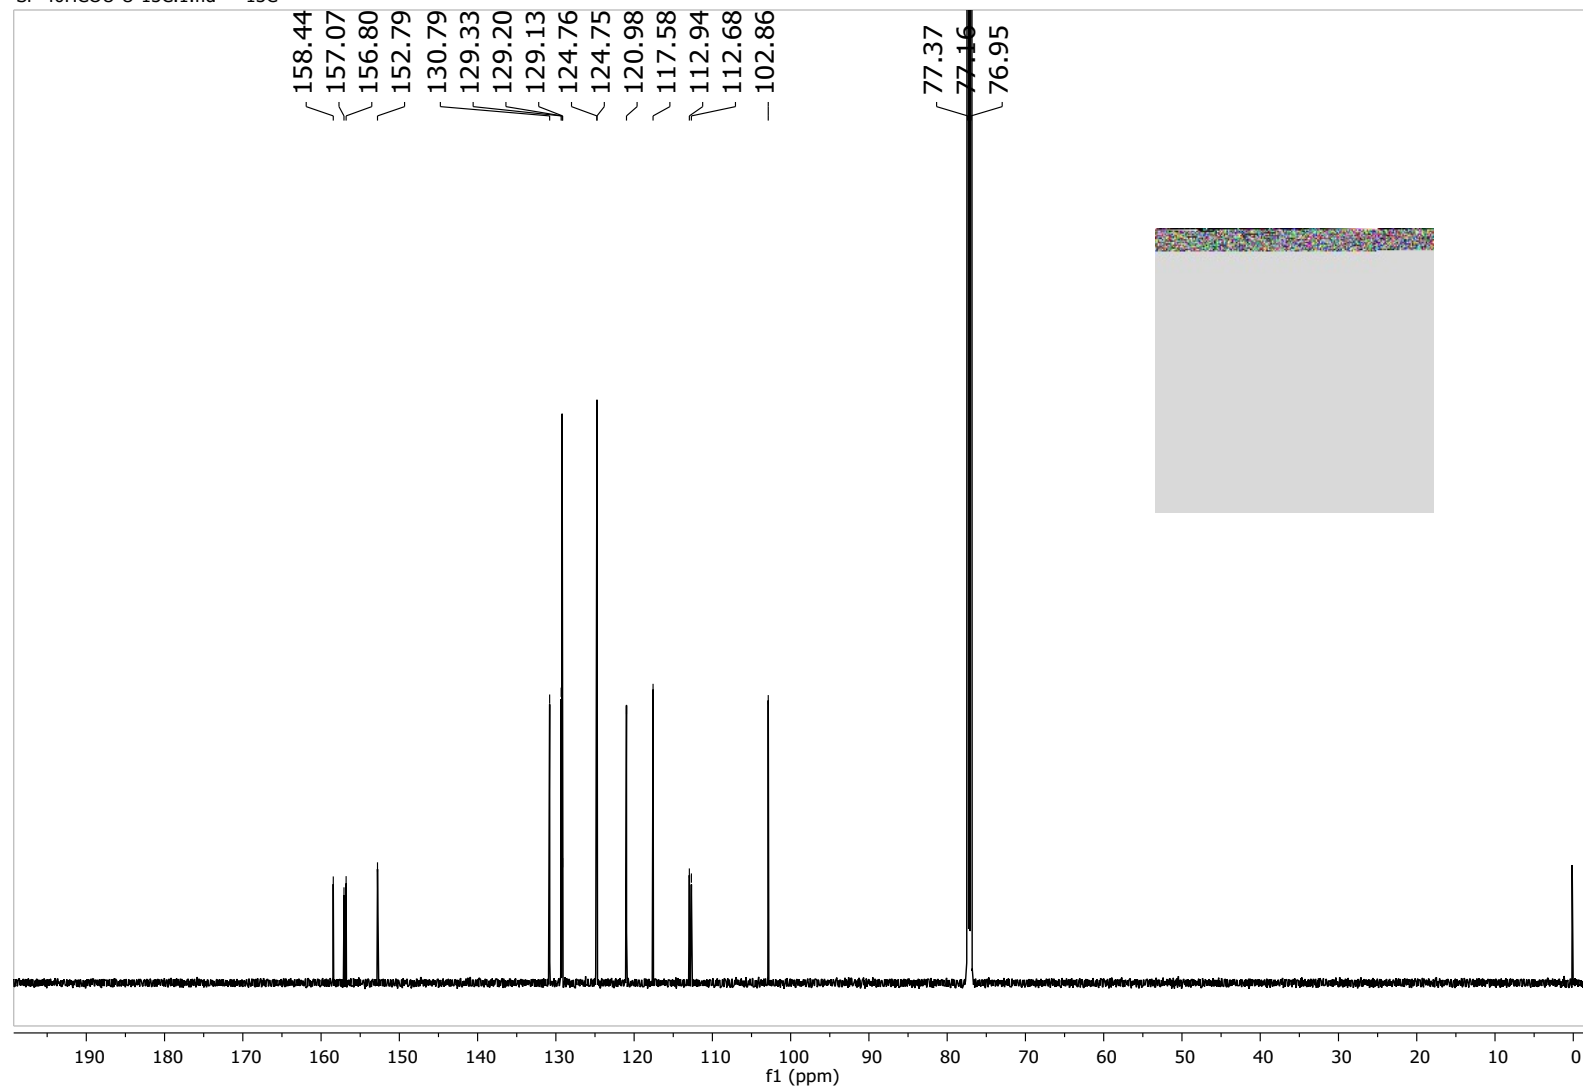

## HRMS Spectrum of 2-Phenyl-4*H*-furo[3,2-*c*]chromen-4-one (3f)

|                    |                             |                               |         |                        |                                 |
|--------------------|-----------------------------|-------------------------------|---------|------------------------|---------------------------------|
| <b>Sample Name</b> |                             | <b>Position</b>               | P1-A7   | <b>Instrument Name</b> | QTOF                            |
| <b>User Name</b>   | SYSTEM (SYSTEM)             | <b>Inj Vol</b>                | 5       | <b>InjPosition</b>     |                                 |
| <b>Sample Type</b> | Sample                      | <b>IRM Calibration Status</b> | Success | <b>Data Filename</b>   | SF6C15.d                        |
| <b>ACQ Method</b>  | DIRECT MASS_POSITIVE_01_1.m | <b>Comment</b>                |         | <b>Acquired Time</b>   | 18-07-2023 16:20:15 (UTC+05:30) |

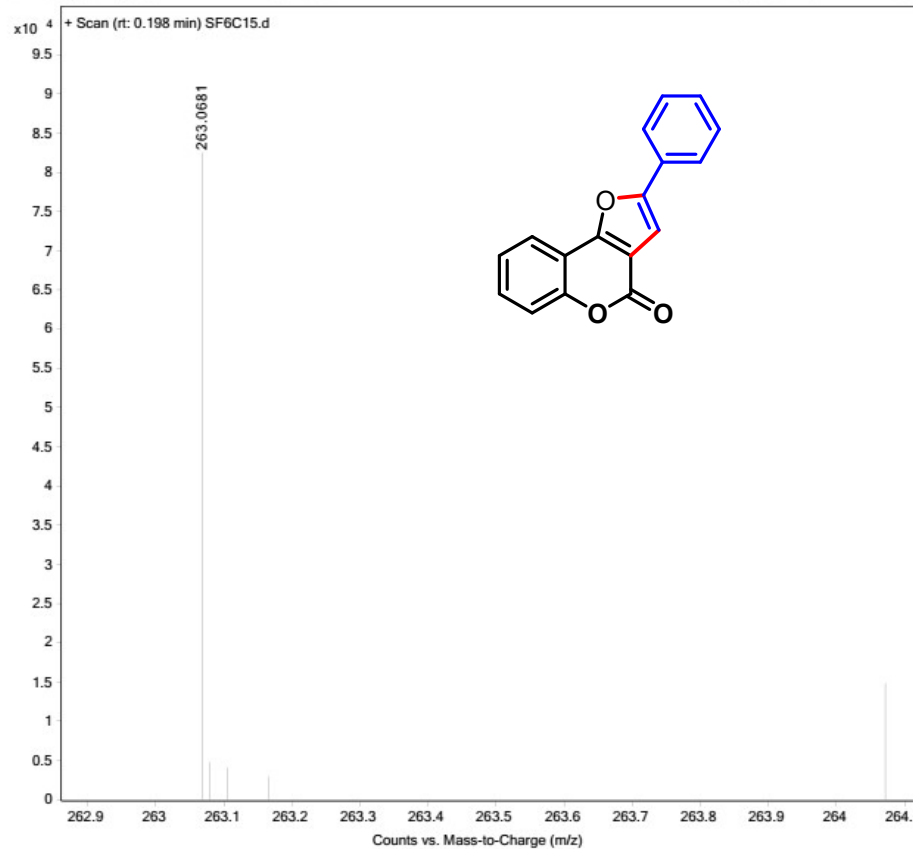

**<sup>1</sup>H NMR Spectrum of 2-(4-Fluorophenyl)-4H-furo[3,2-c]chromen-4-one (3g)**

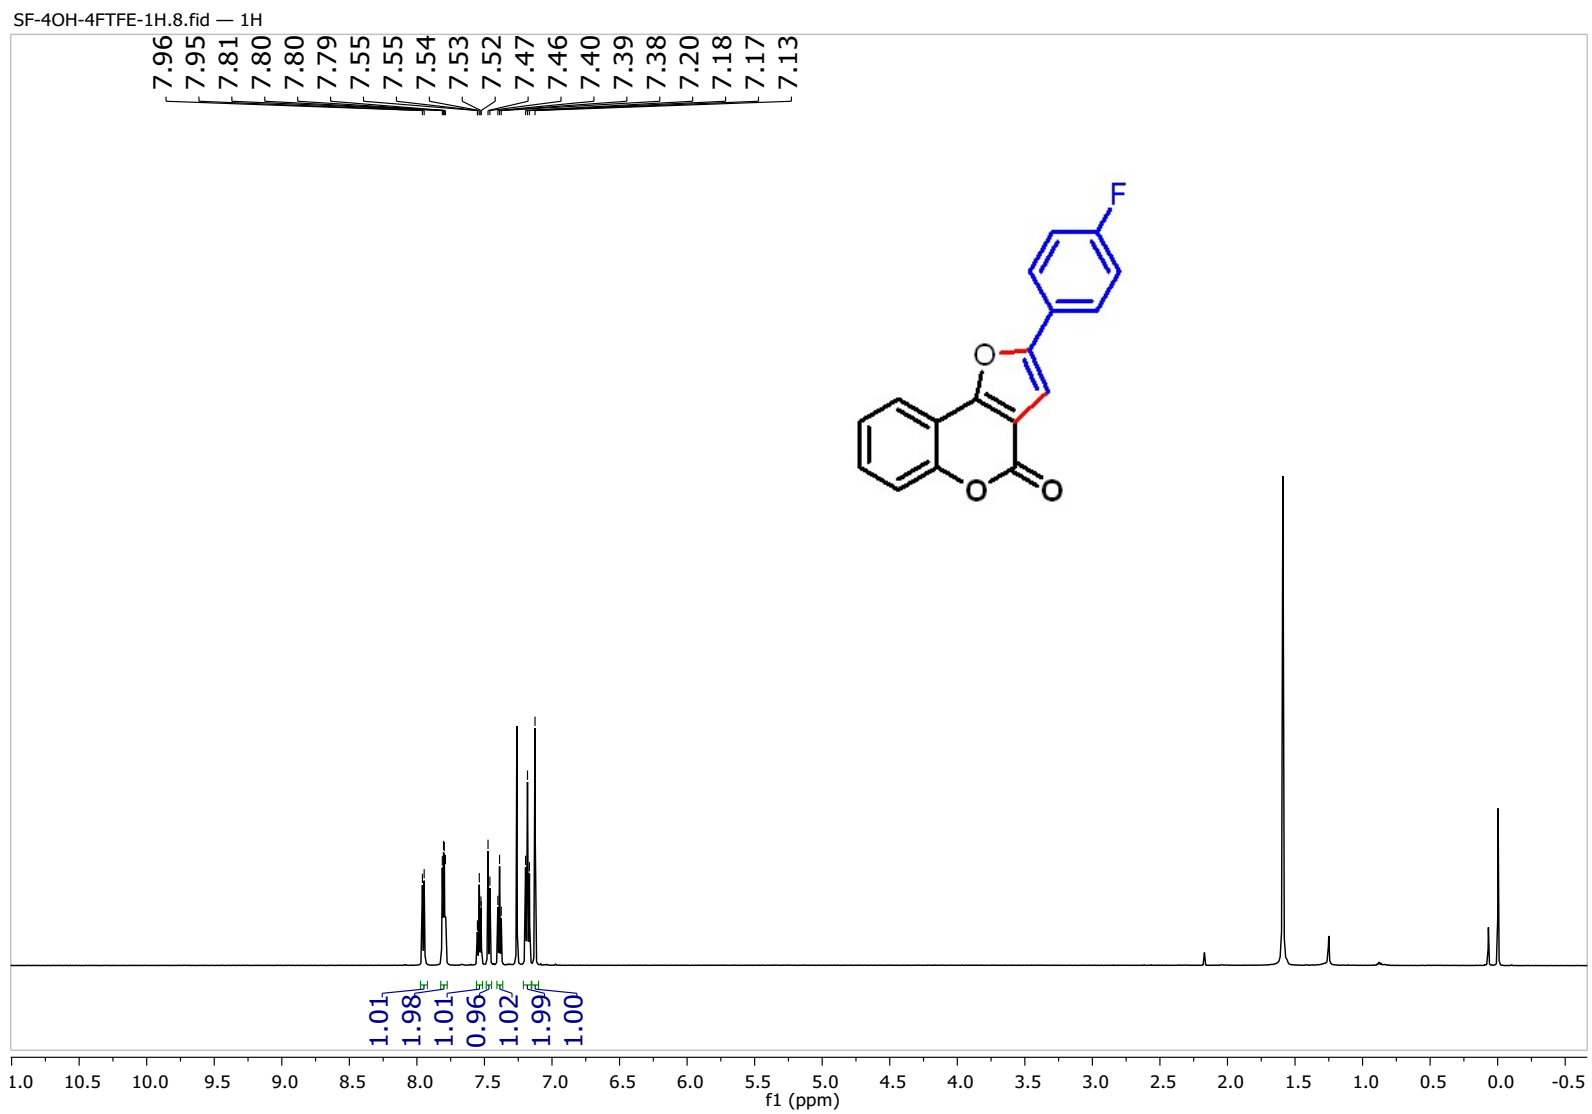

**<sup>13</sup>C NMR Spectrum of 2-(4-Fluorophenyl)-4H-furo[3,2-c]chromen-4-one (3g)**

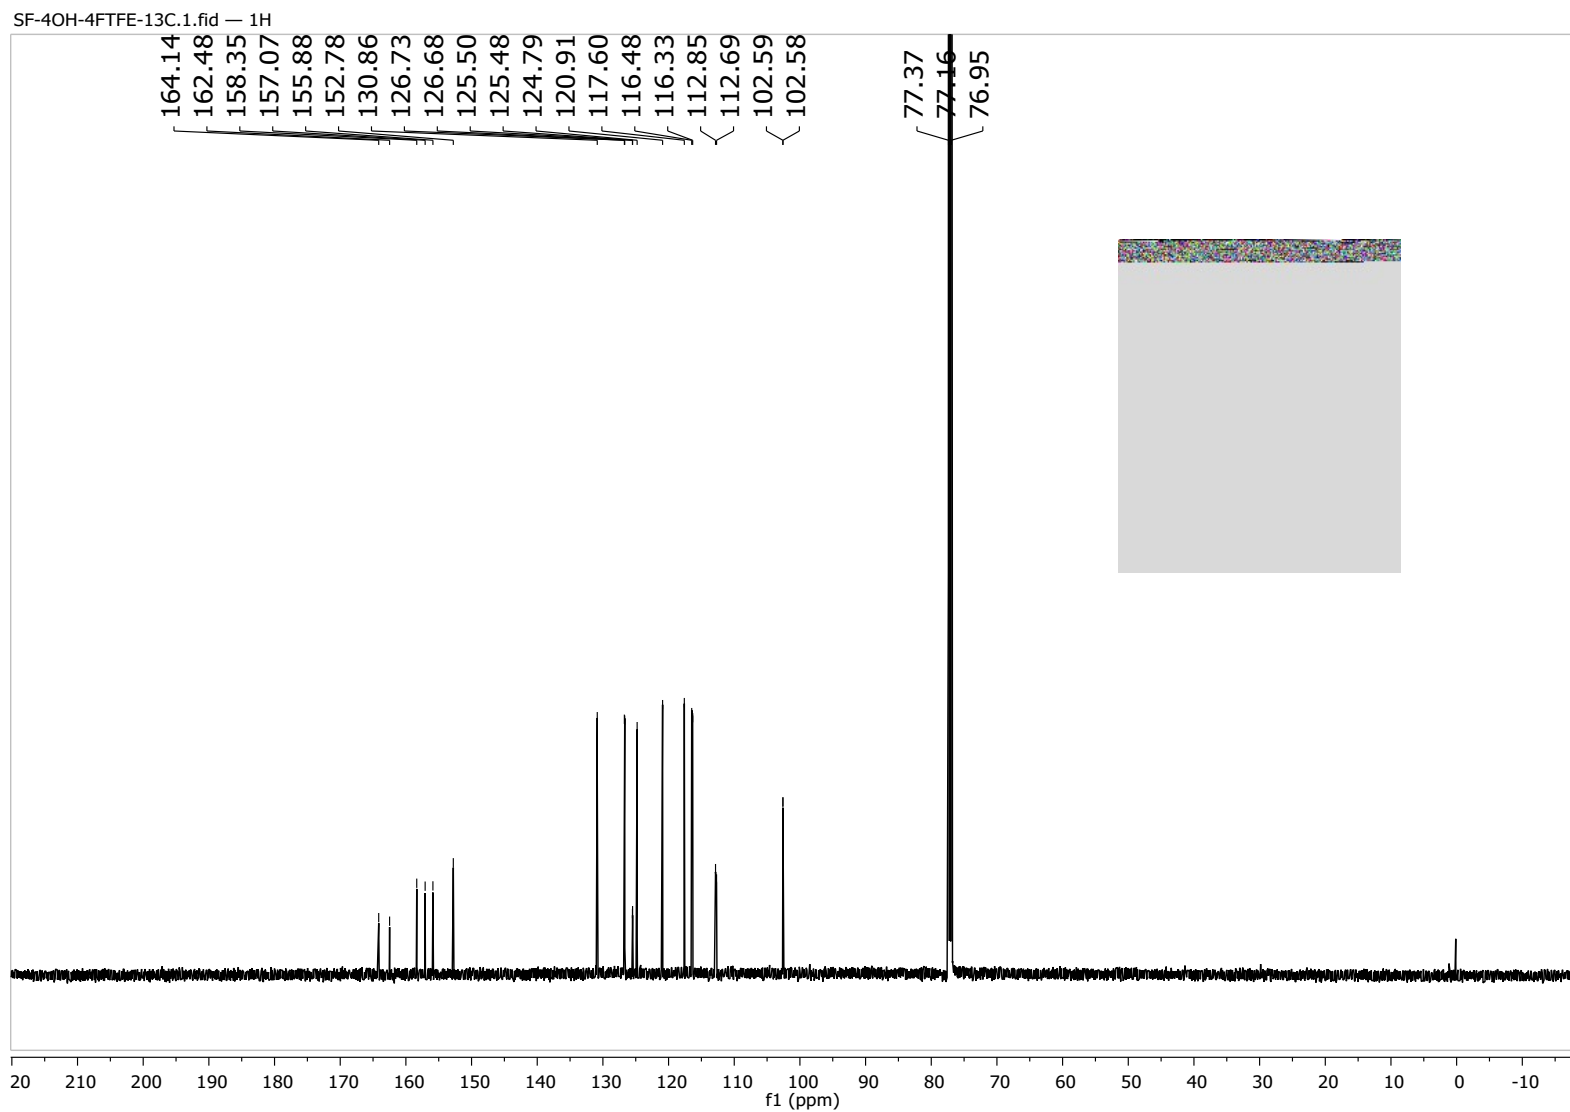

**<sup>19</sup>F NMR Spectrum of 2-(4-Fluorophenyl)-4H-furo[3,2-c]chromen-4-one (3g)**

SF-4OH-4FTFE-19F.10.fid — 19F

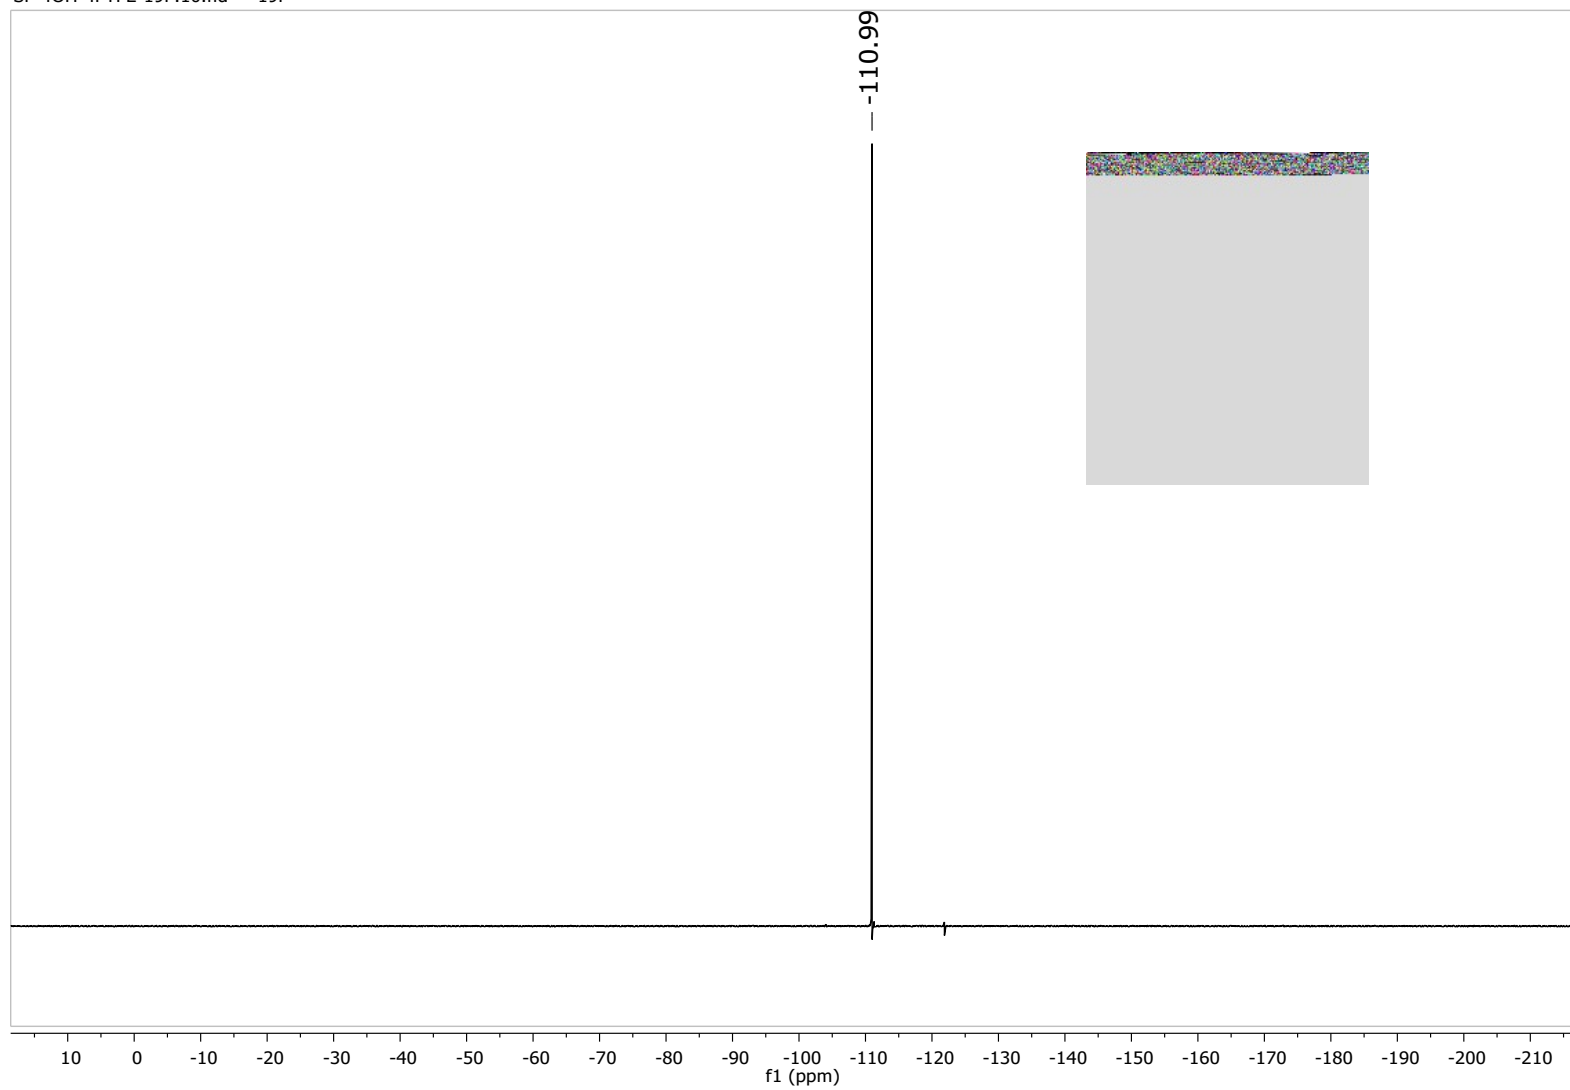



## HRMS Spectrum of 2-(4-Fluorophenyl)-4*H*-furo[3,2-*c*]chromen-4-one (3g)

|                    |                                 |                               |         |                        |                                 |
|--------------------|---------------------------------|-------------------------------|---------|------------------------|---------------------------------|
| <b>Sample Name</b> | Sample10                        | <b>Position</b>               | P1-A9   | <b>Instrument Name</b> | QTOF                            |
| <b>User Name</b>   | SYSTEM (SYSTEM)                 | <b>Inj Vol</b>                | 5       | <b>InjPosition</b>     |                                 |
| <b>Sample Type</b> | Sample                          | <b>IRM Calibration Status</b> | Success | <b>Data Filename</b>   | RFK-25.d                        |
| <b>ACQ Method</b>  | DIRECT MASS_POSITIVE_100_1500.m | <b>Comment</b>                |         | <b>Acquired Time</b>   | 31-07-2023 10:06:44 (UTC+05:30) |

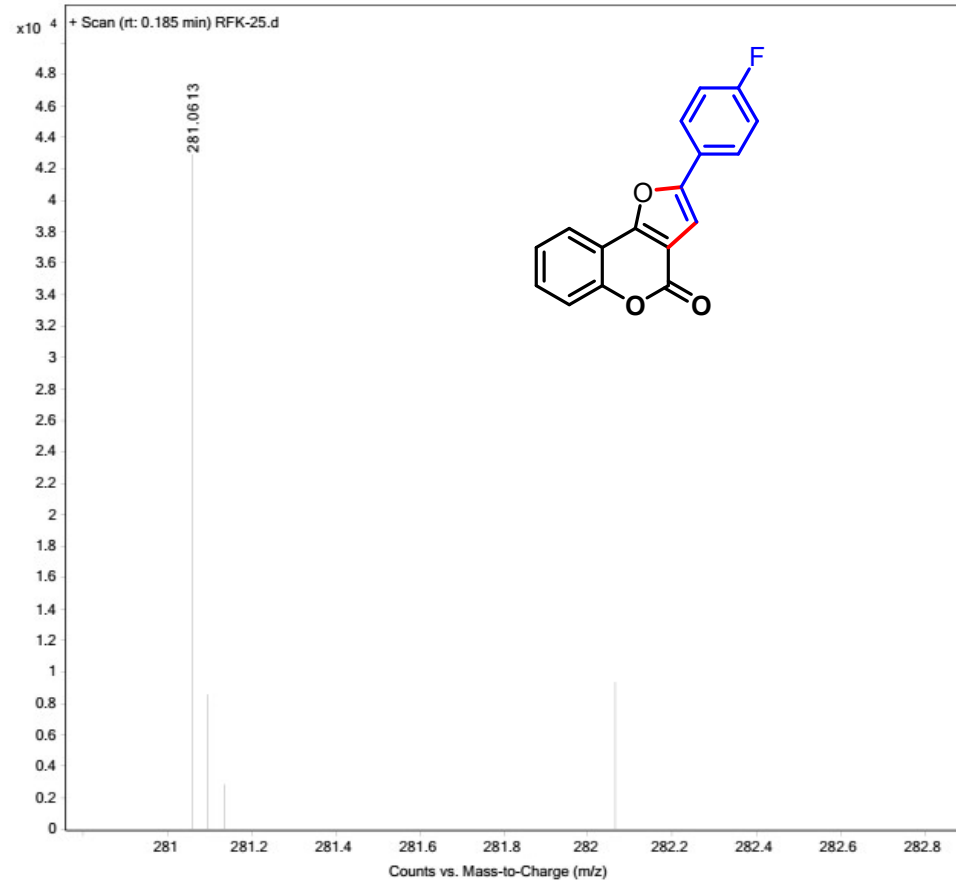

# <sup>1</sup>H NMR Spectrum of 2-(4-Chlorophenyl)-4H-furo[3,2-c]chromen-4-one (3h)

SF-4OH-ST-CL-1H.1.fid - 1H

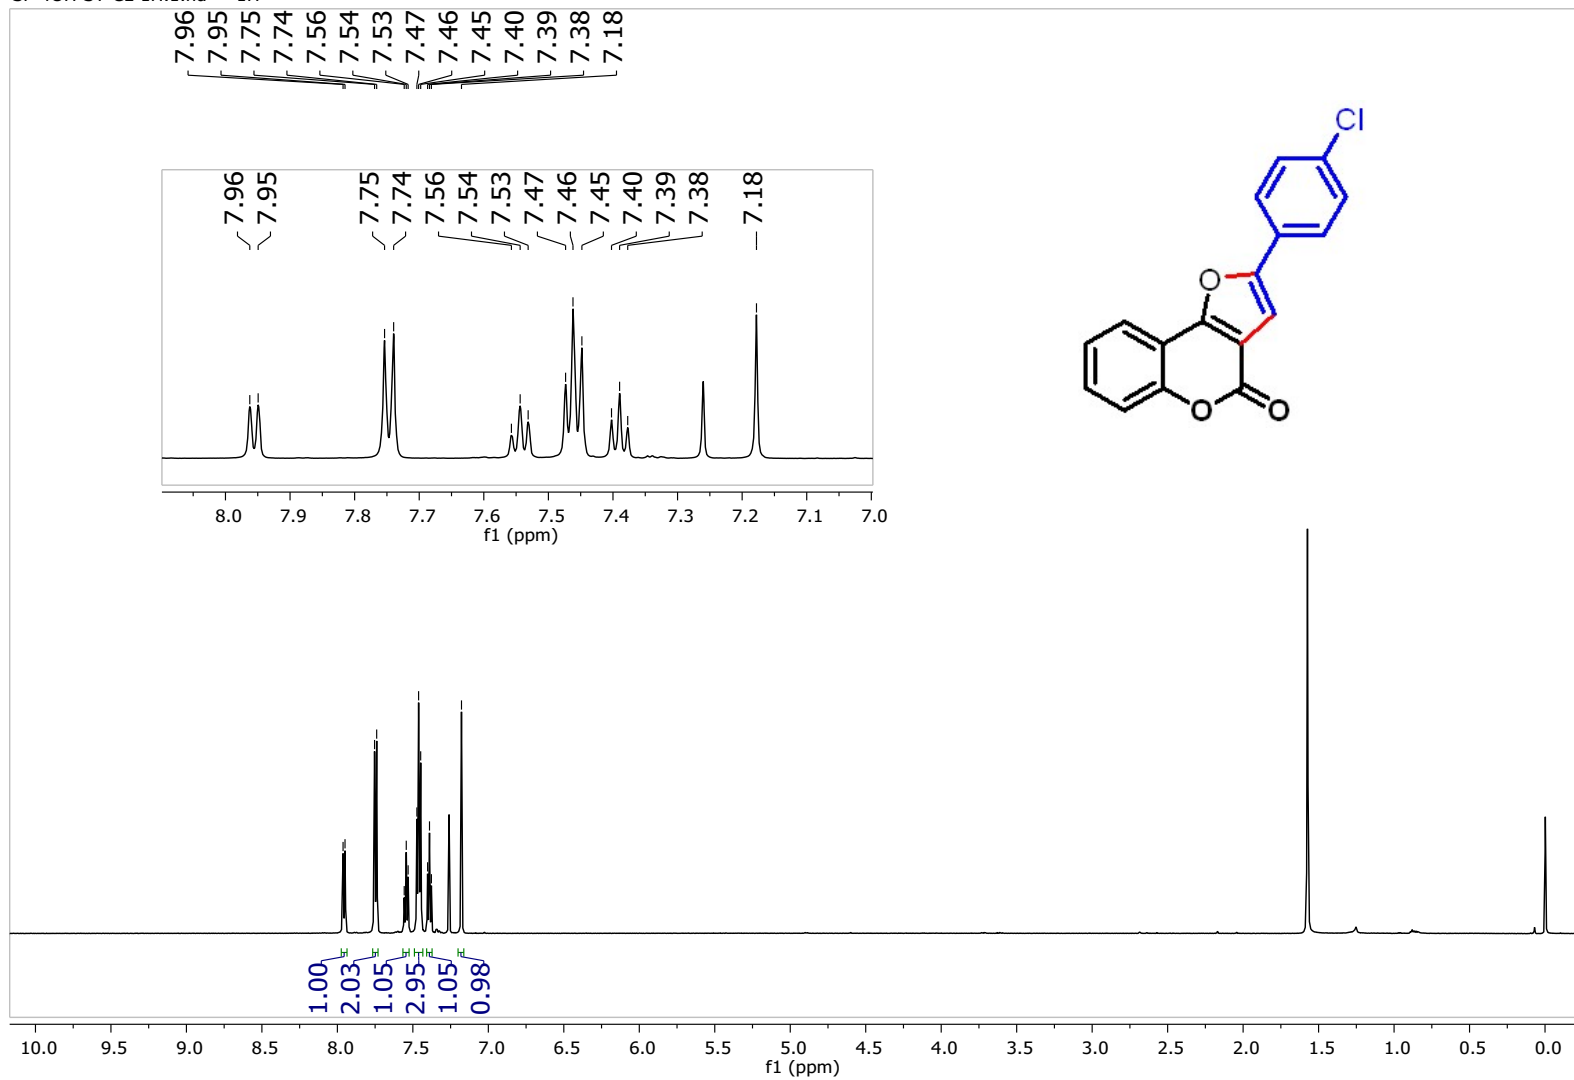

<sup>13</sup>C NMR Spectrum of 2-(4-Chlorophenyl)-4H-furo[3,2-c]chromen-4-one (3h)

SF-4OH-STCL-2-13C.1.fid — 13C

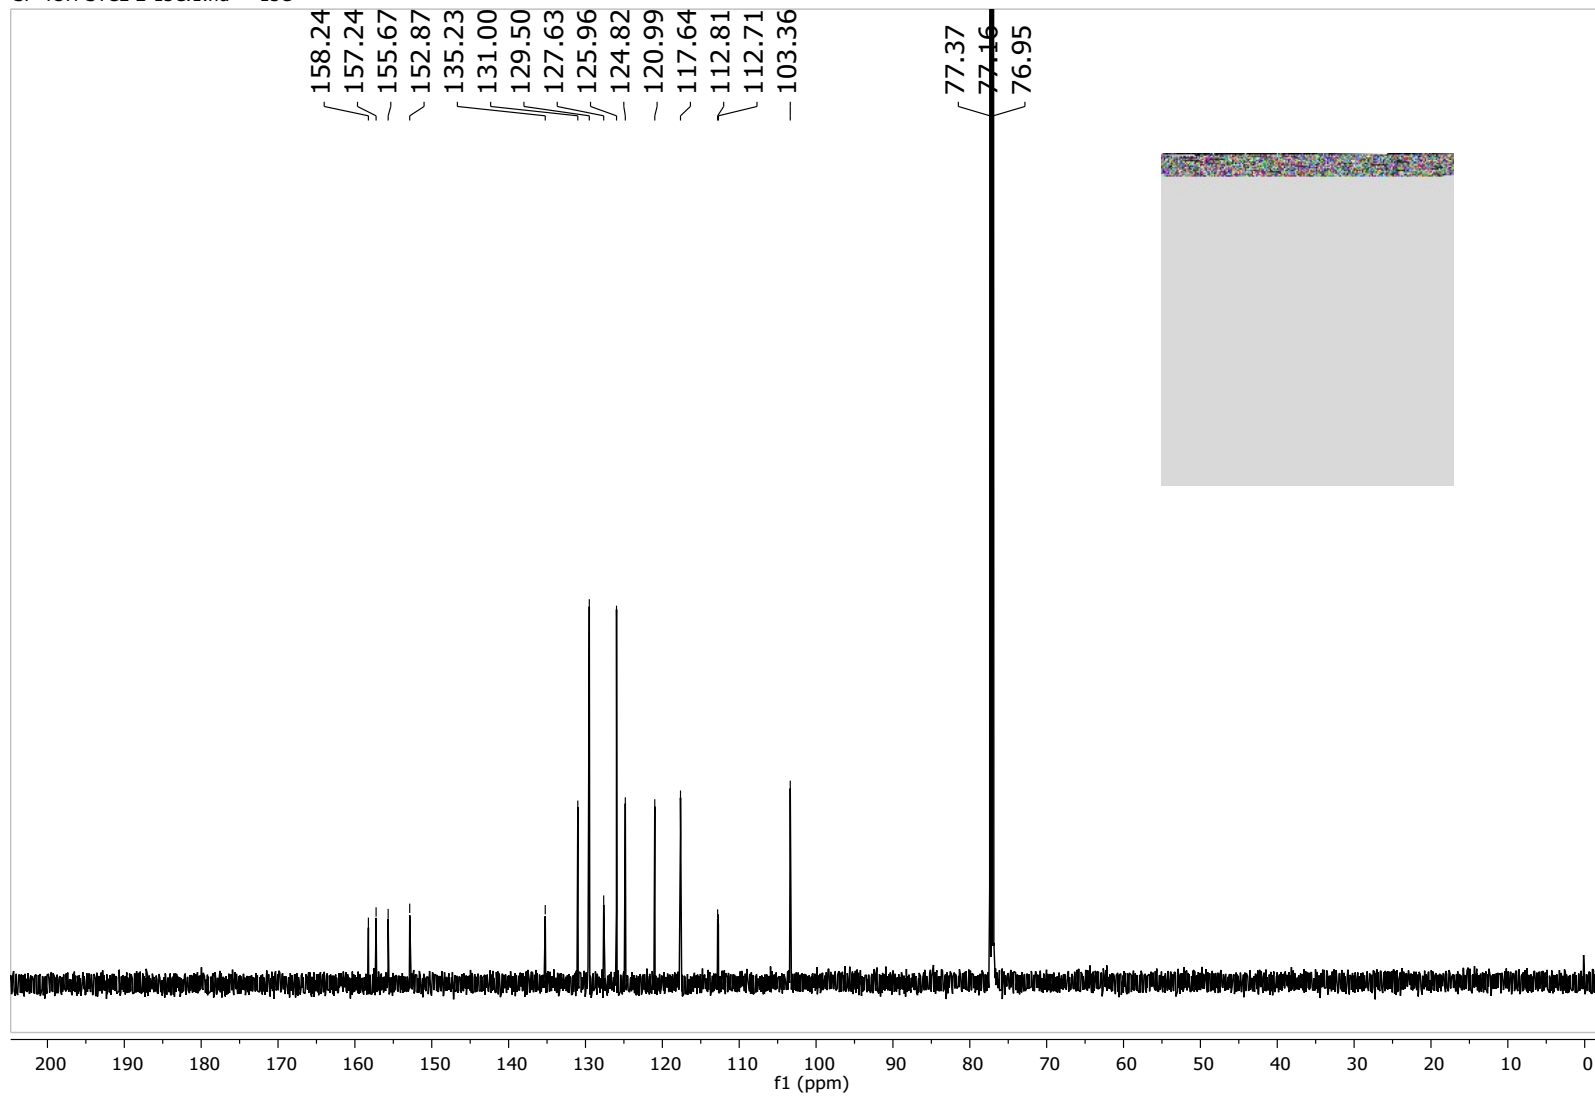

## HRMS Spectrum of 2-(4-Chlorophenyl)-4*H*-furo[3,2-*c*]chromen-4-one (3h)

|             |                                 |                        |         |                 |                                 |
|-------------|---------------------------------|------------------------|---------|-----------------|---------------------------------|
| Sample Name | Sample12                        | Position               | P1-A11  | Instrument Name | QTOF                            |
| User Name   | SYSTEM (SYSTEM)                 | Inj Vol                | 5       | InjPosition     |                                 |
| Sample Type | Sample                          | IRM Calibration Status | Success | Data Filename   | sf6354.d                        |
| ACQ Method  | DIRECT MASS_POSITIVE_100_1500.m | Comment                |         | Acquired Time   | 12-07-2023 15:16:16 (UTC+05:30) |

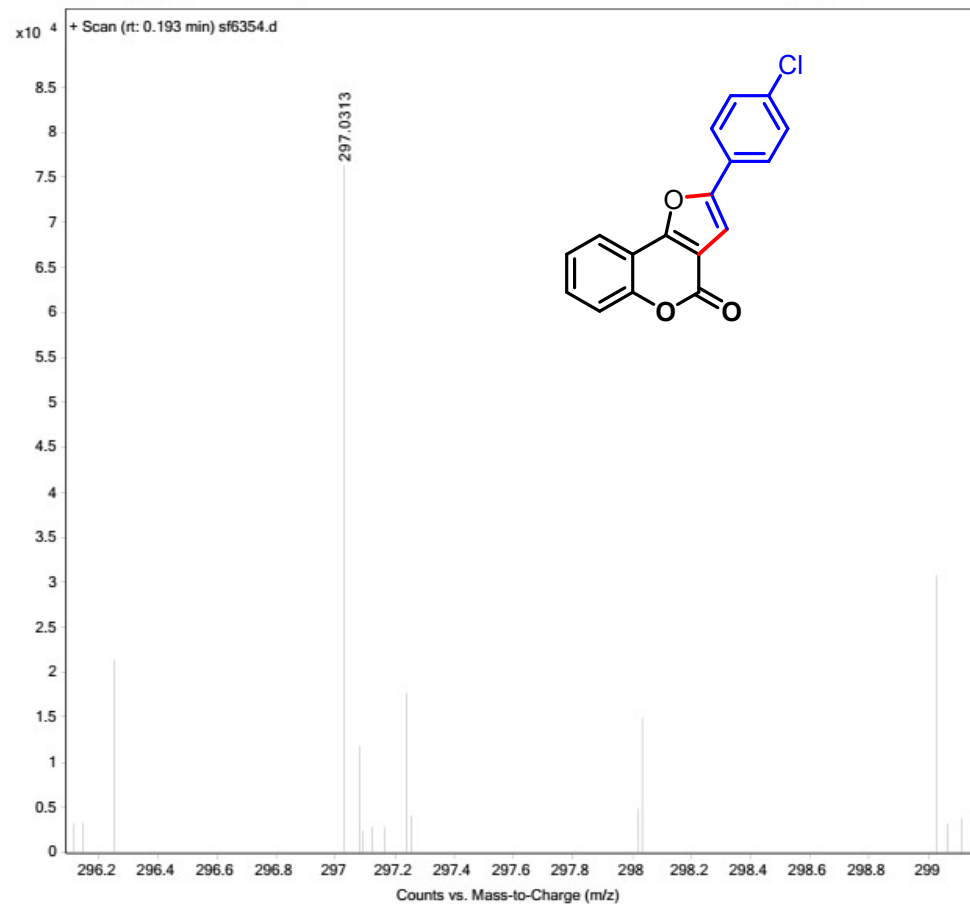

# <sup>1</sup>H NMR Spectrum of 2-(*p*-Tolyl)-4*H*-furo[3,2-*c*]chromen-4-one (3i)

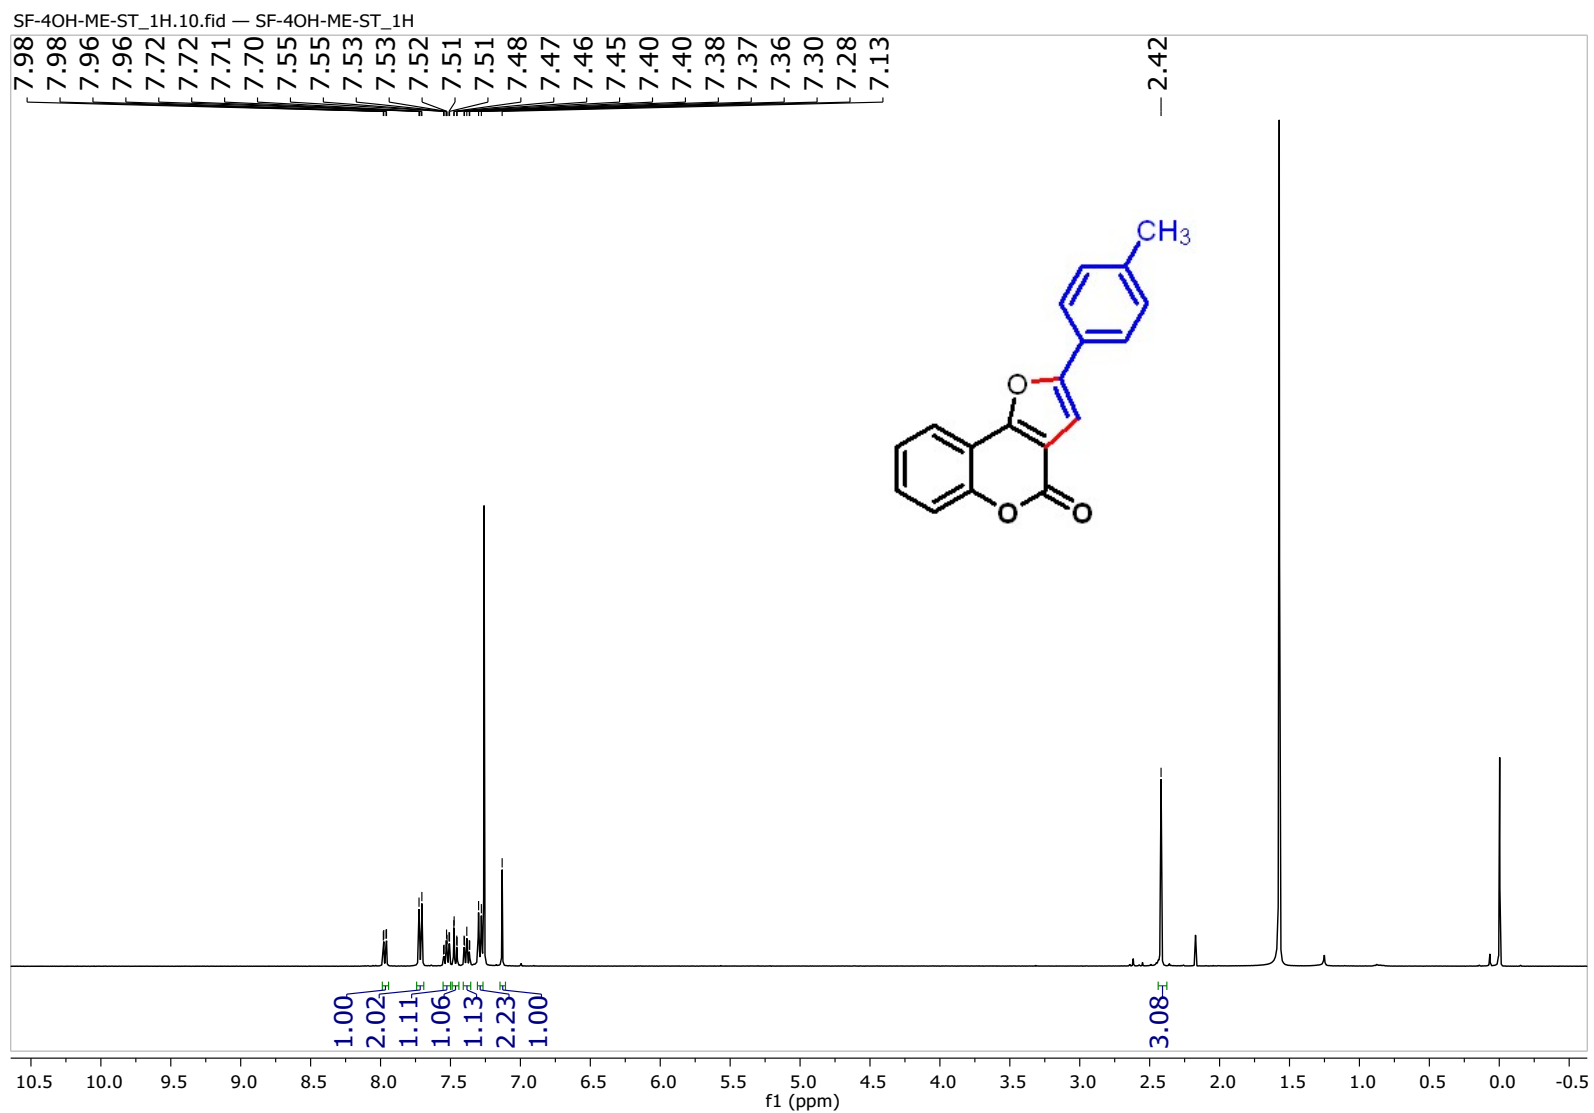

**<sup>13</sup>C NMR Spectrum of 2-(*p*-Tolyl)-4*H*-furo[3,2-*c*]chromen-4-one (3i)**

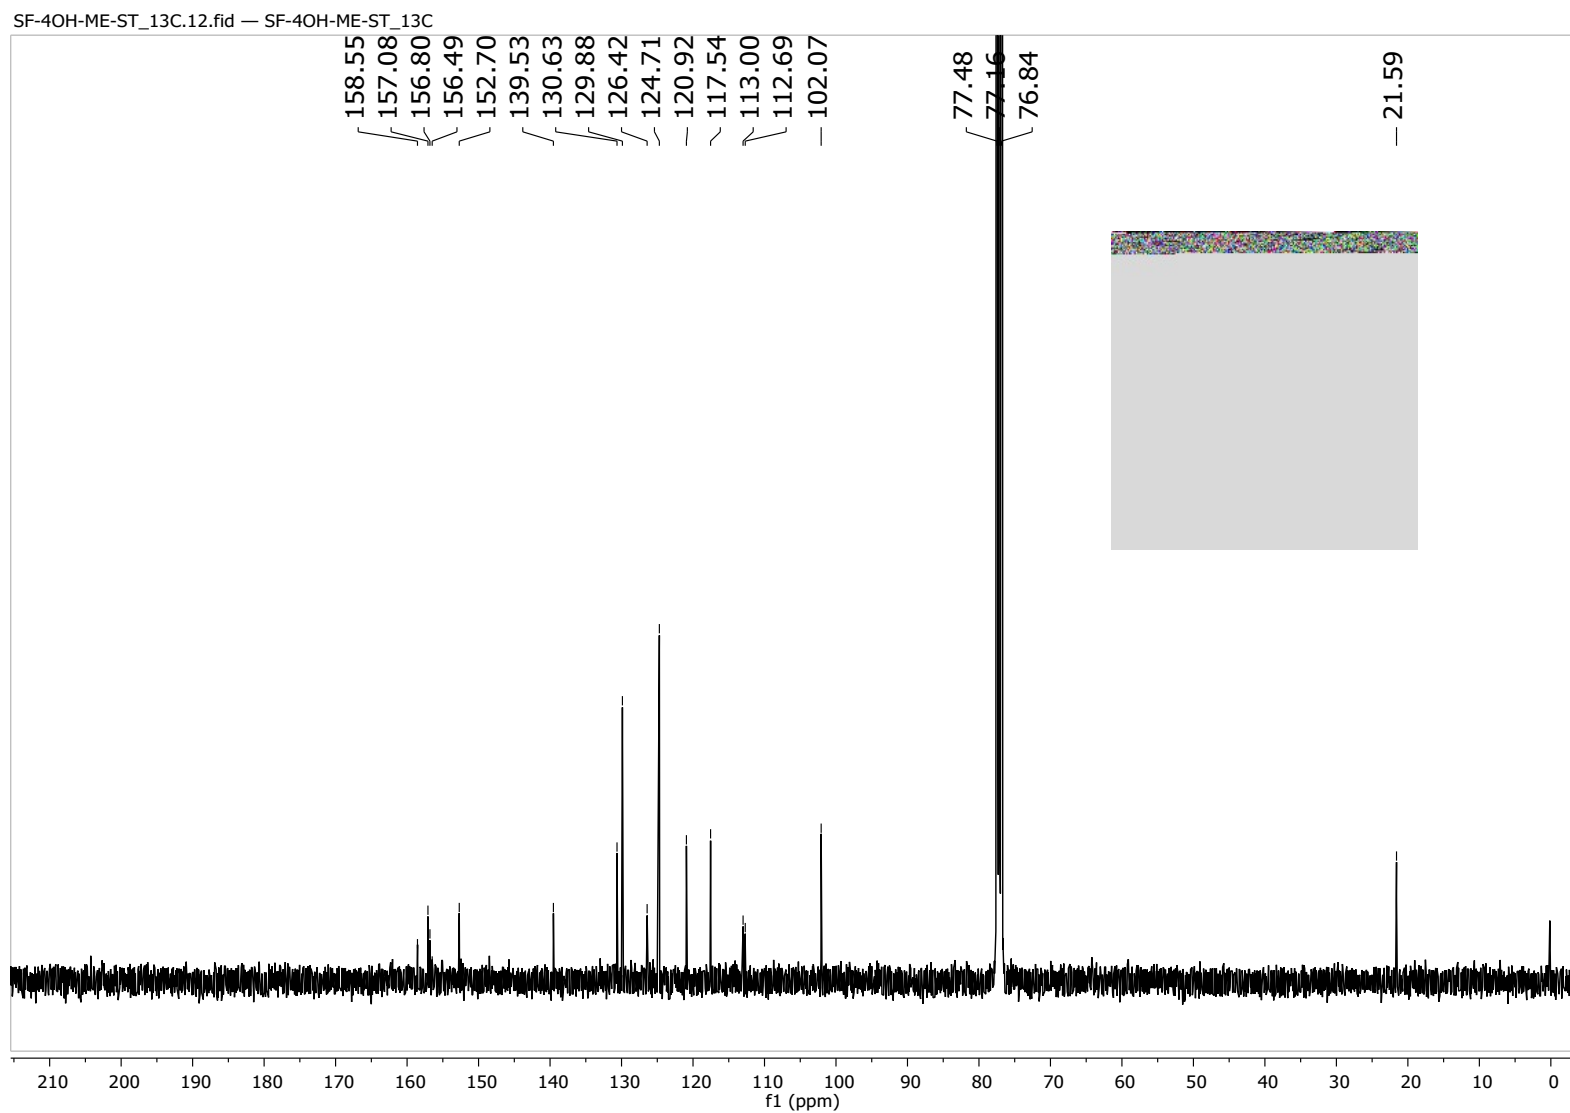

# HRMS Spectrum of 2-(*p*-Tolyl)-4*H*-furo[3,2-*c*]chromen-4-one (3i)

|                    |                             |                               |         |                        |                                 |
|--------------------|-----------------------------|-------------------------------|---------|------------------------|---------------------------------|
| <b>Sample Name</b> | Sample20                    | <b>Position</b>               | P1-B4   | <b>Instrument Name</b> | QTOF                            |
| <b>User Name</b>   | SYSTEM (SYSTEM)             | <b>Inj Vol</b>                | 5       | <b>InjPosition</b>     |                                 |
| <b>Sample Type</b> | Sample                      | <b>IRM Calibration Status</b> | Success | <b>Data Filename</b>   | SFK288.d                        |
| <b>ACQ Method</b>  | DIRECT MASS_POSITIVE_01_1.m | <b>Comment</b>                |         | <b>Acquired Time</b>   | 30-06-2023 15:22:20 (UTC+05:30) |

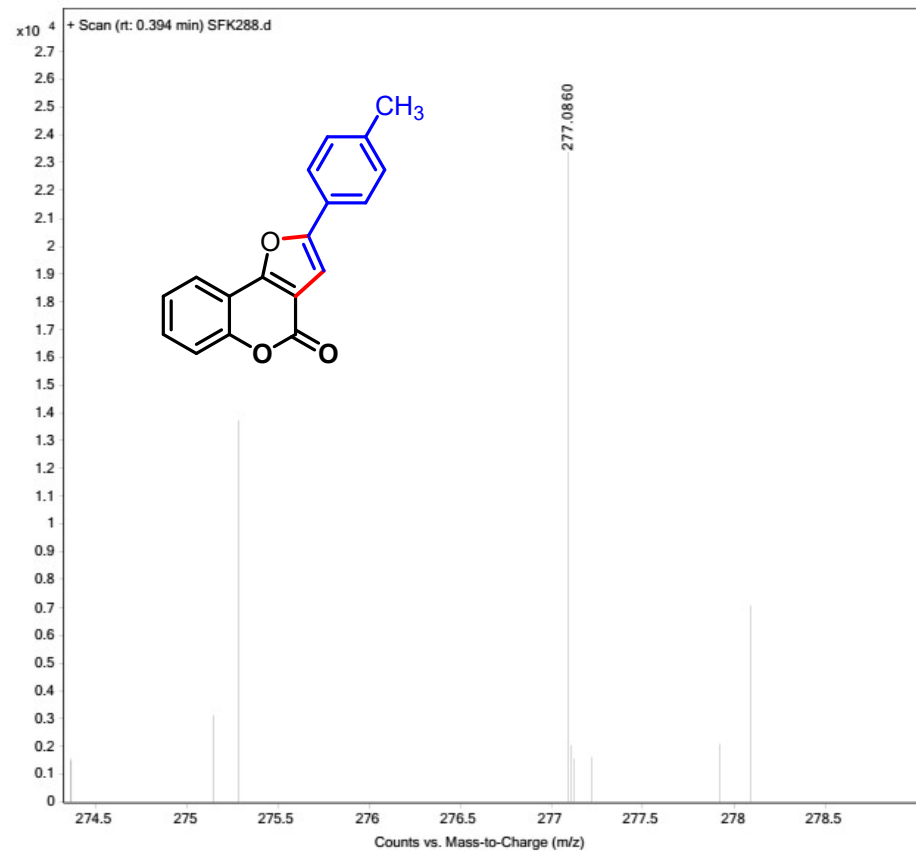

# <sup>1</sup>H NMR Spectrum of 2-(*m*-Tolyl)-4*H*-furo[3,2-*c*]chromen-4-one (3j)

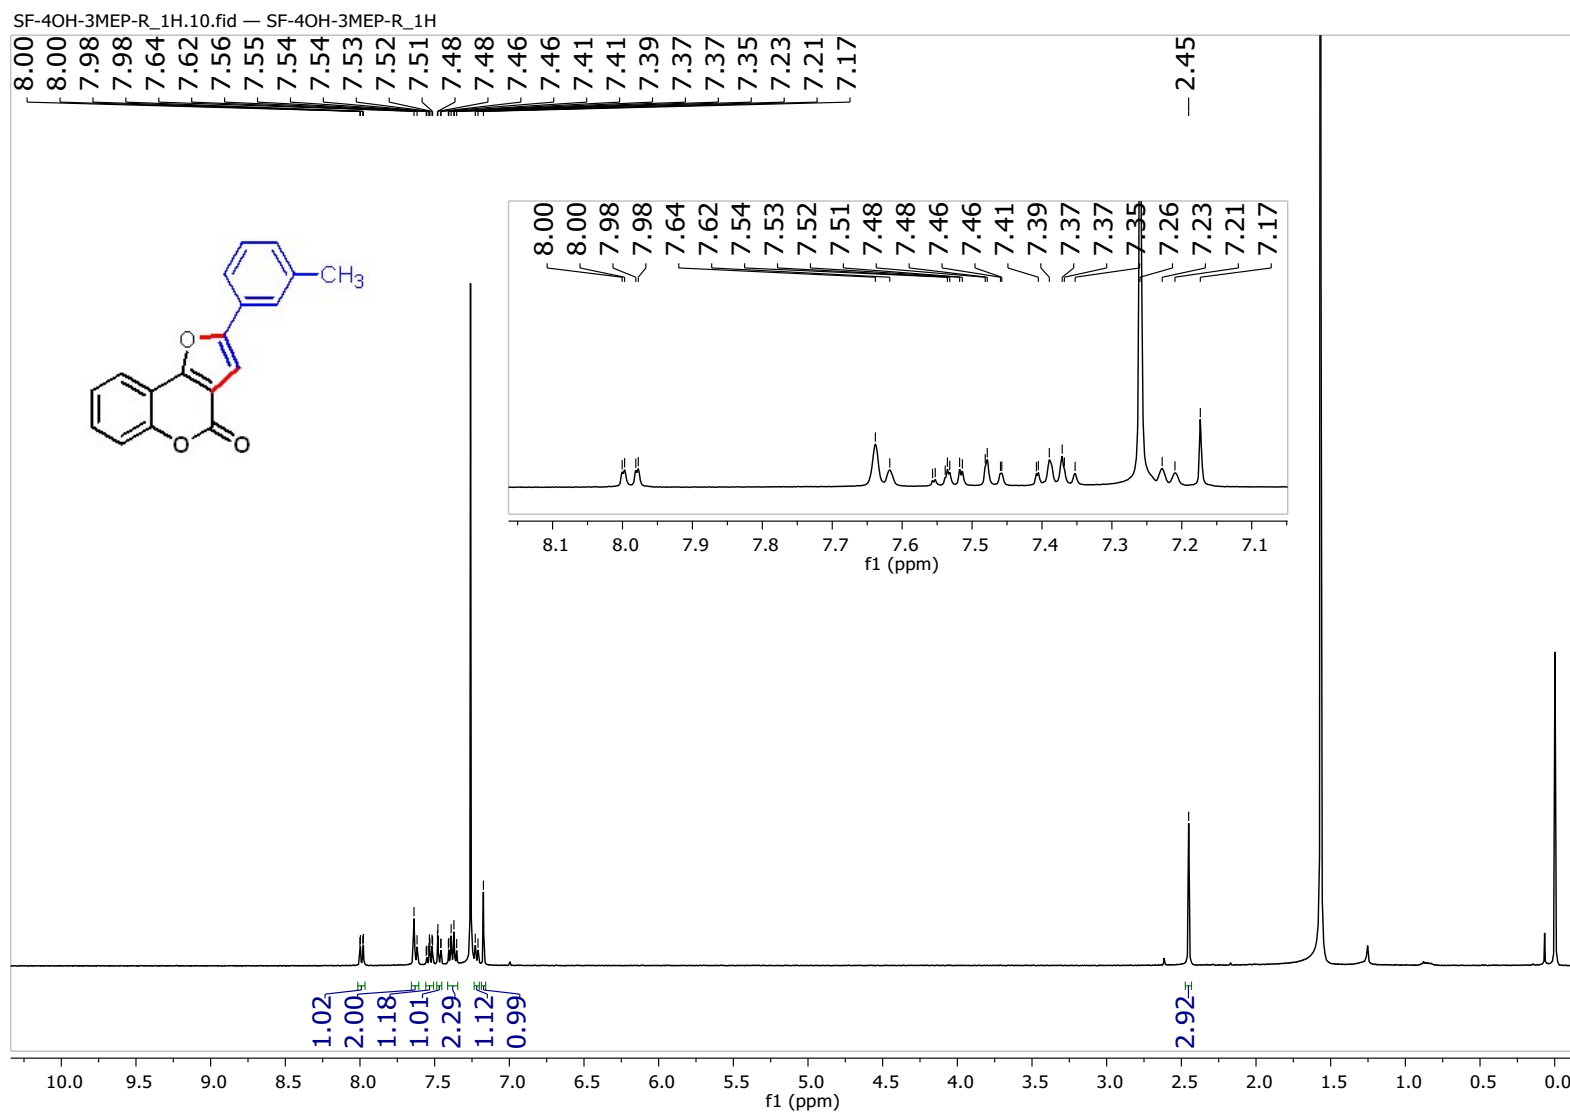



**<sup>13</sup>C NMR Spectrum of 2-(*m*-Tolyl)-4*H*-furo[3,2-*c*]chromen-4-one (3j)**

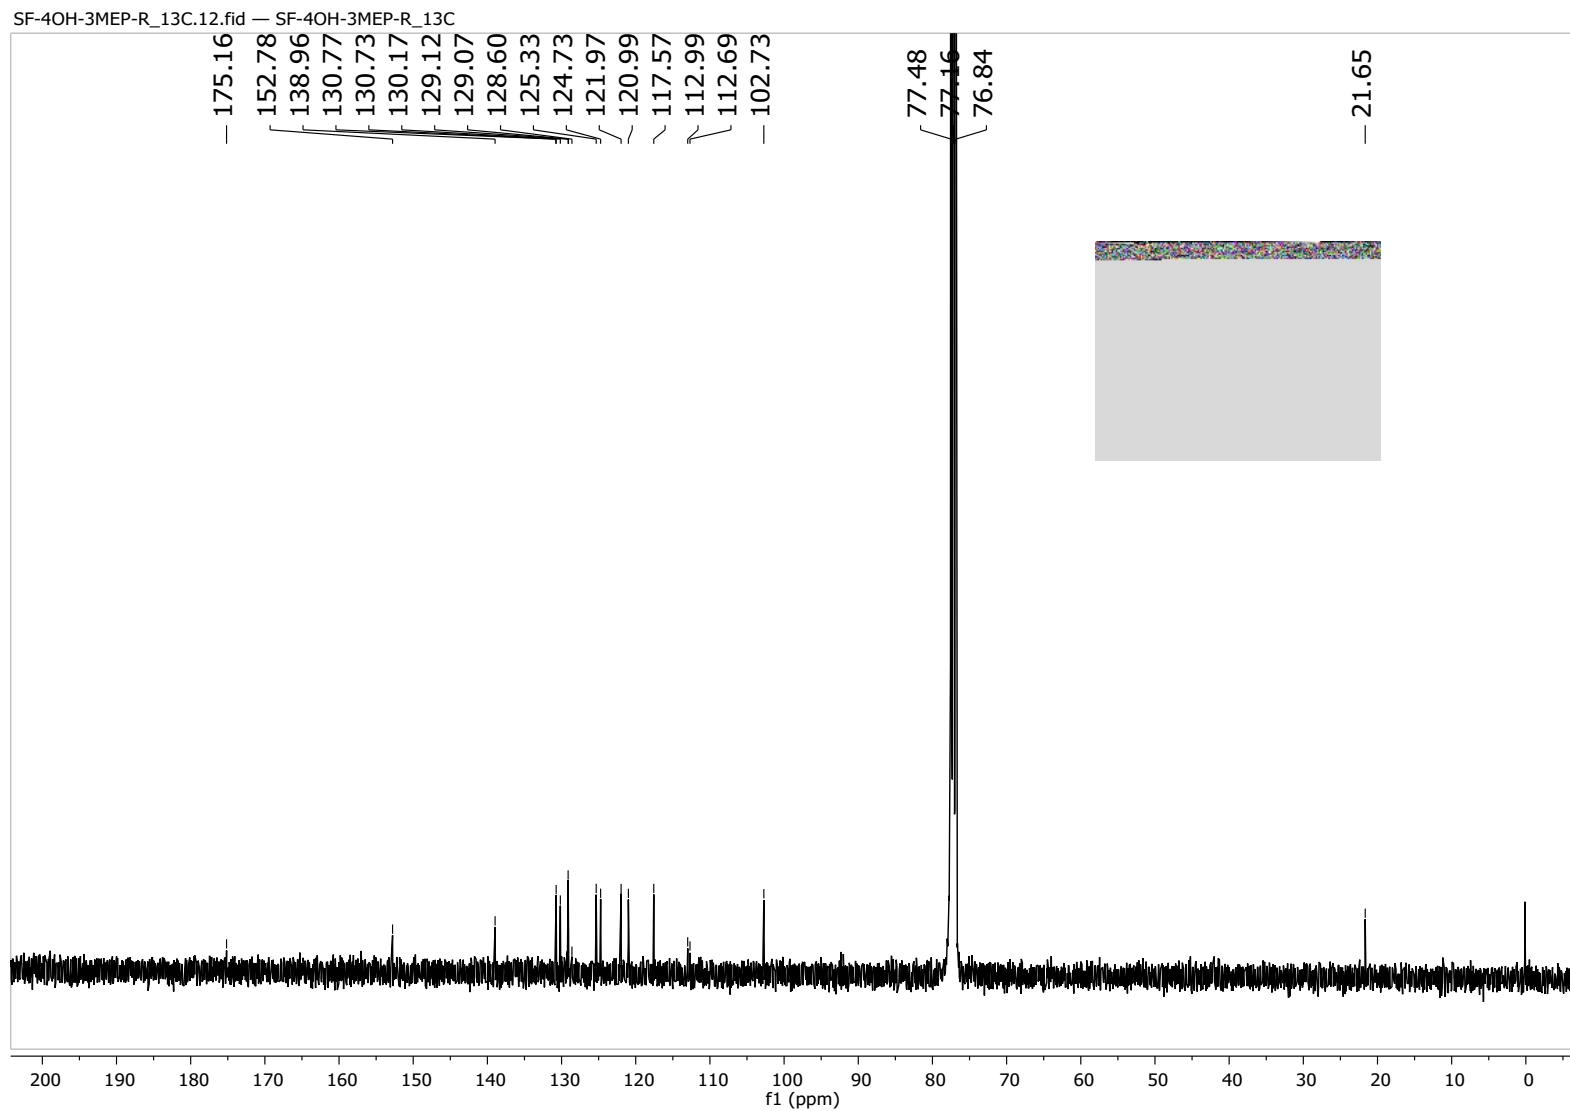

## HRMS NMR Spectrum of 2-(*m*-Tolyl)-4*H*-furo[3,2-*c*]chromen-4-one (3j)

|                    |                             |                               |         |                        |                                 |
|--------------------|-----------------------------|-------------------------------|---------|------------------------|---------------------------------|
| <b>Sample Name</b> | Sample21                    | <b>Position</b>               | P1-B5   | <b>Instrument Name</b> | QTOF                            |
| <b>User Name</b>   | SYSTEM (SYSTEM)             | <b>Inj Vol</b>                | 5       | <b>InjPosition</b>     |                                 |
| <b>Sample Type</b> | Sample                      | <b>IRM Calibration Status</b> | Success | <b>Data Filename</b>   | SFK289.d                        |
| <b>ACQ Method</b>  | DIRECT MASS_POSITIVE_01_1.m | <b>Comment</b>                |         | <b>Acquired Time</b>   | 30-06-2023 15:24:23 (UTC+05:30) |

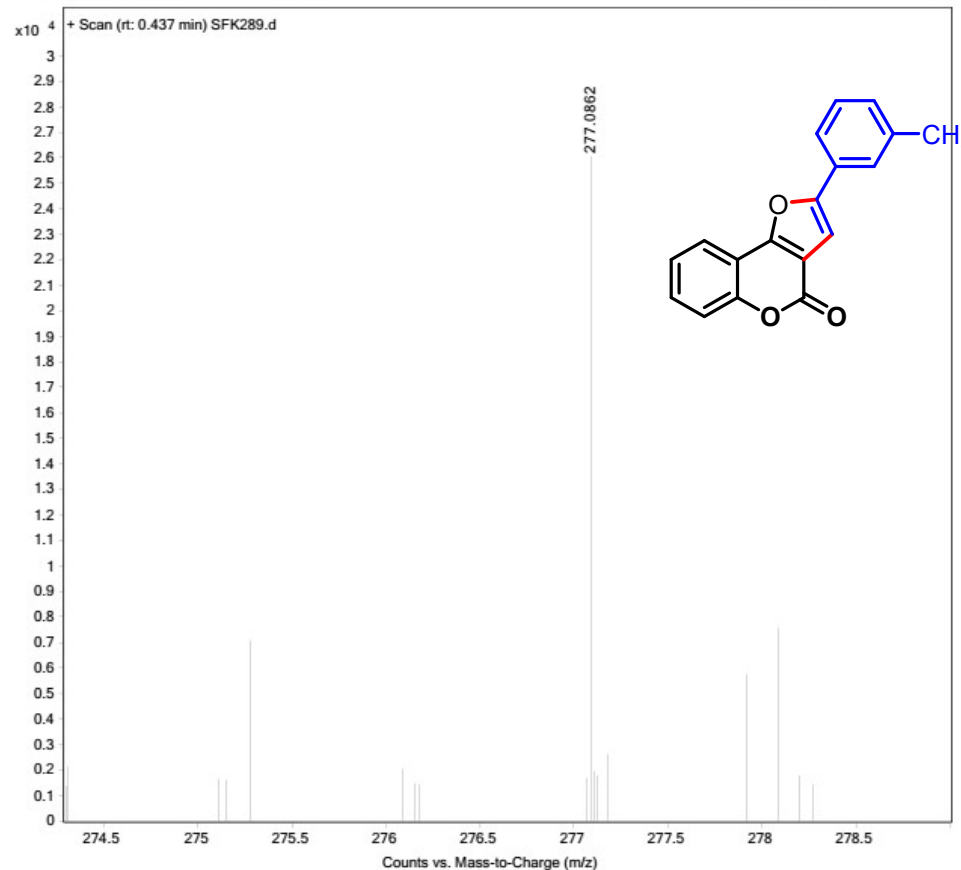

# <sup>1</sup>H NMR Spectrum of 7-Methoxy-2-phenyl-4H-furo[3,2-c]chromen-4-one (3k)

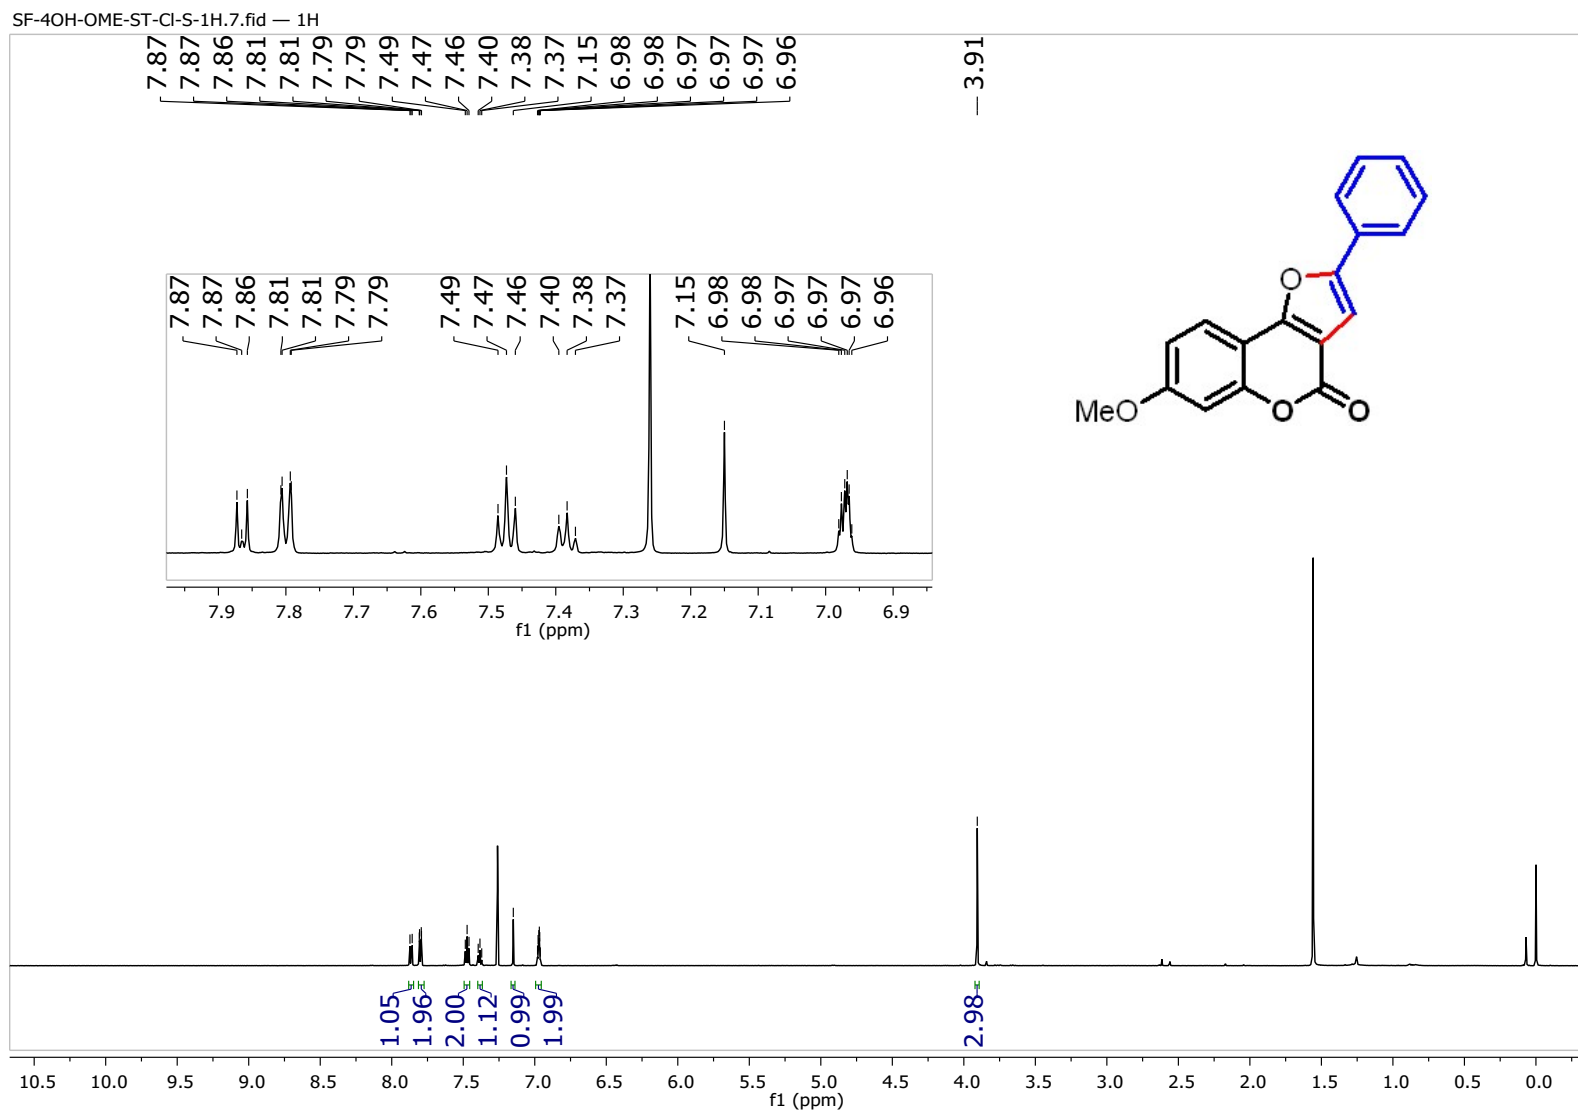

**<sup>13</sup>C NMR Spectrum of 7-Methoxy-2-phenyl-4*H*-furo[3,2-*c*]chromen-4-one (3k)**

SF-4OH-OME-ST-CI-S-13C.9.fid | 13C

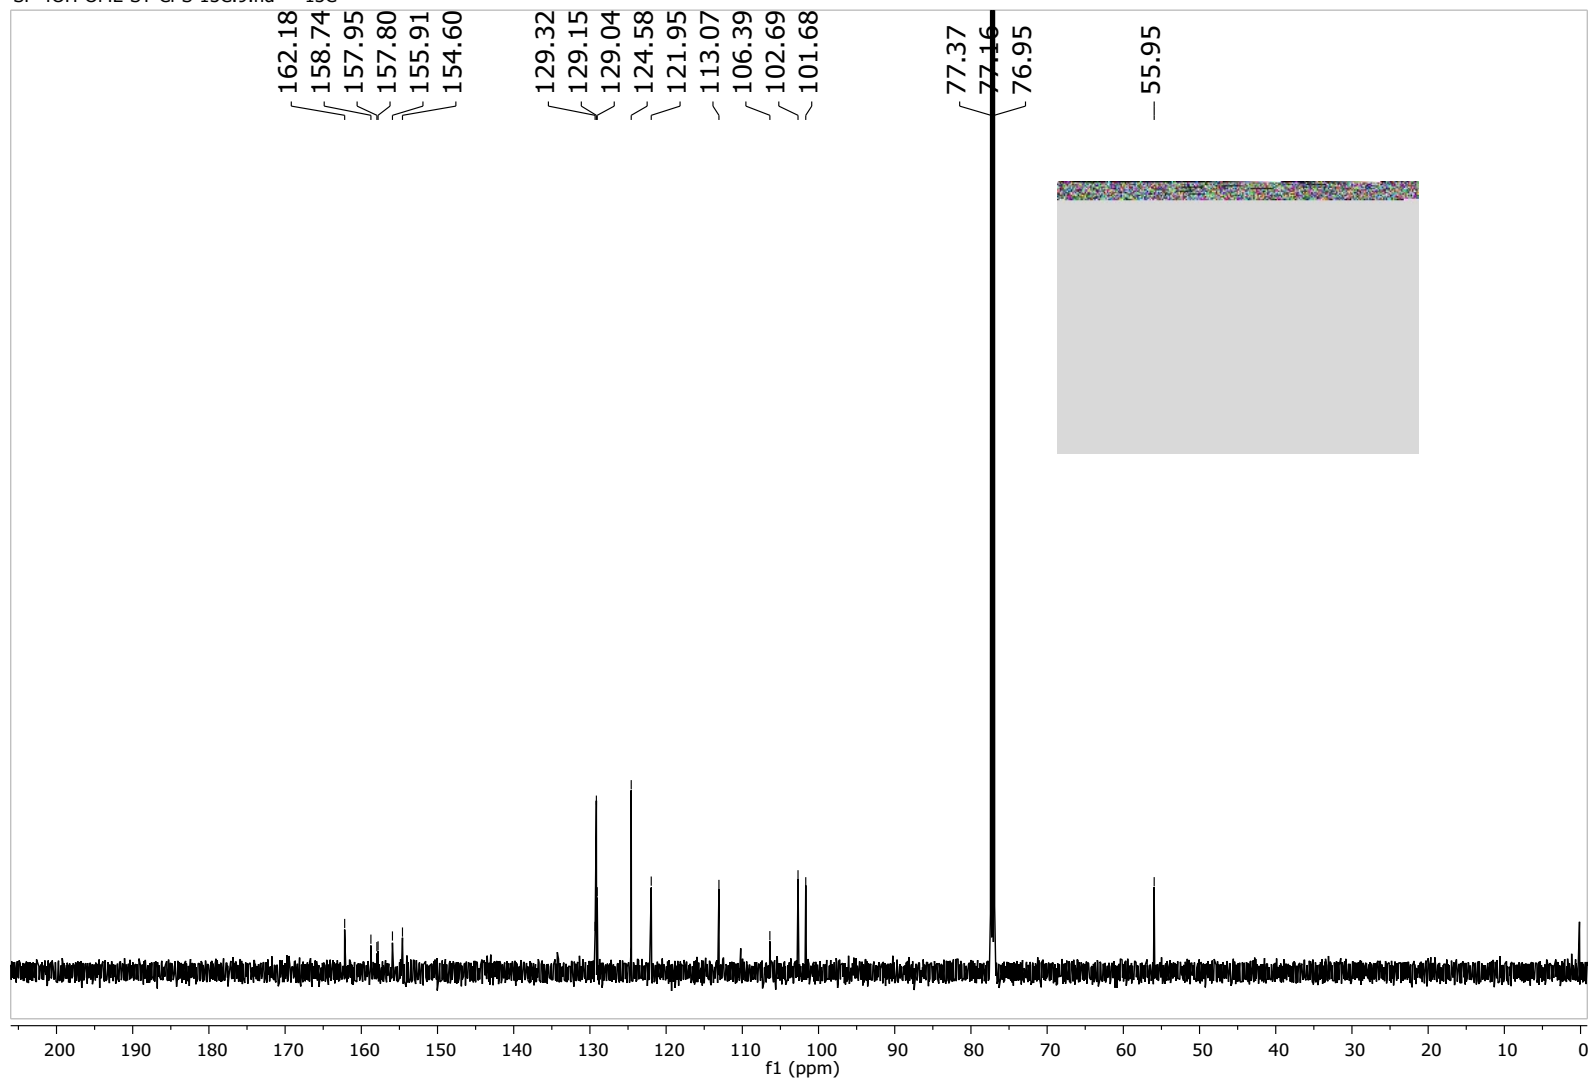

## HRMS Spectrum of 7-Methoxy-2-phenyl-4*H*-furo[3,2-*c*]chromen-4-one (3k)

Sample Name  
User Name  
Sample Type  
ACQ Method

SYSTEM (SYSTEM)  
Sample  
DIRECT MASS\_POSITIVE\_01\_1.m

Position P1-A4  
Inj Vol 5  
IRM Calibration Status Success  
Comment

Instrument Name QTOF  
InjPosition  
Data Filename SF6C12.d  
Acquired Time 18-07-2023 16:14:05 (UTC+05:30)

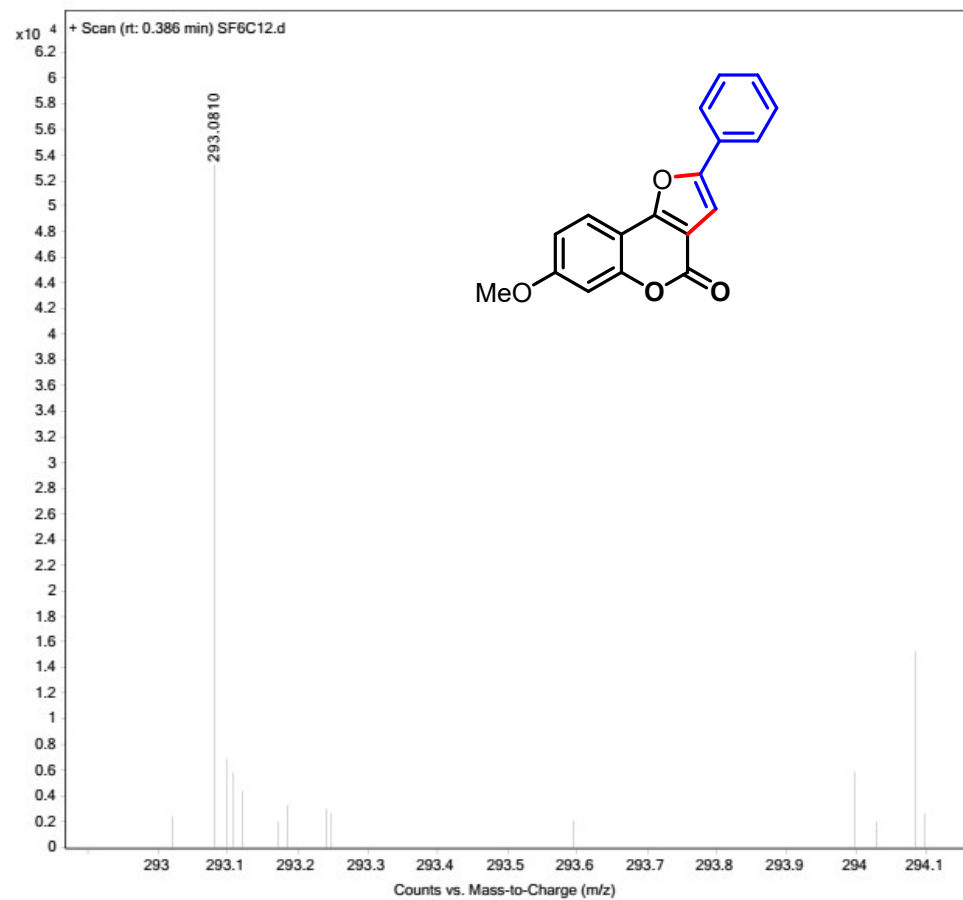

# <sup>1</sup>H NMR Spectrum of 2-(4-Fluorophenyl)-7-methoxy-4H-furo[3,2-c]chromen-4-one (31)

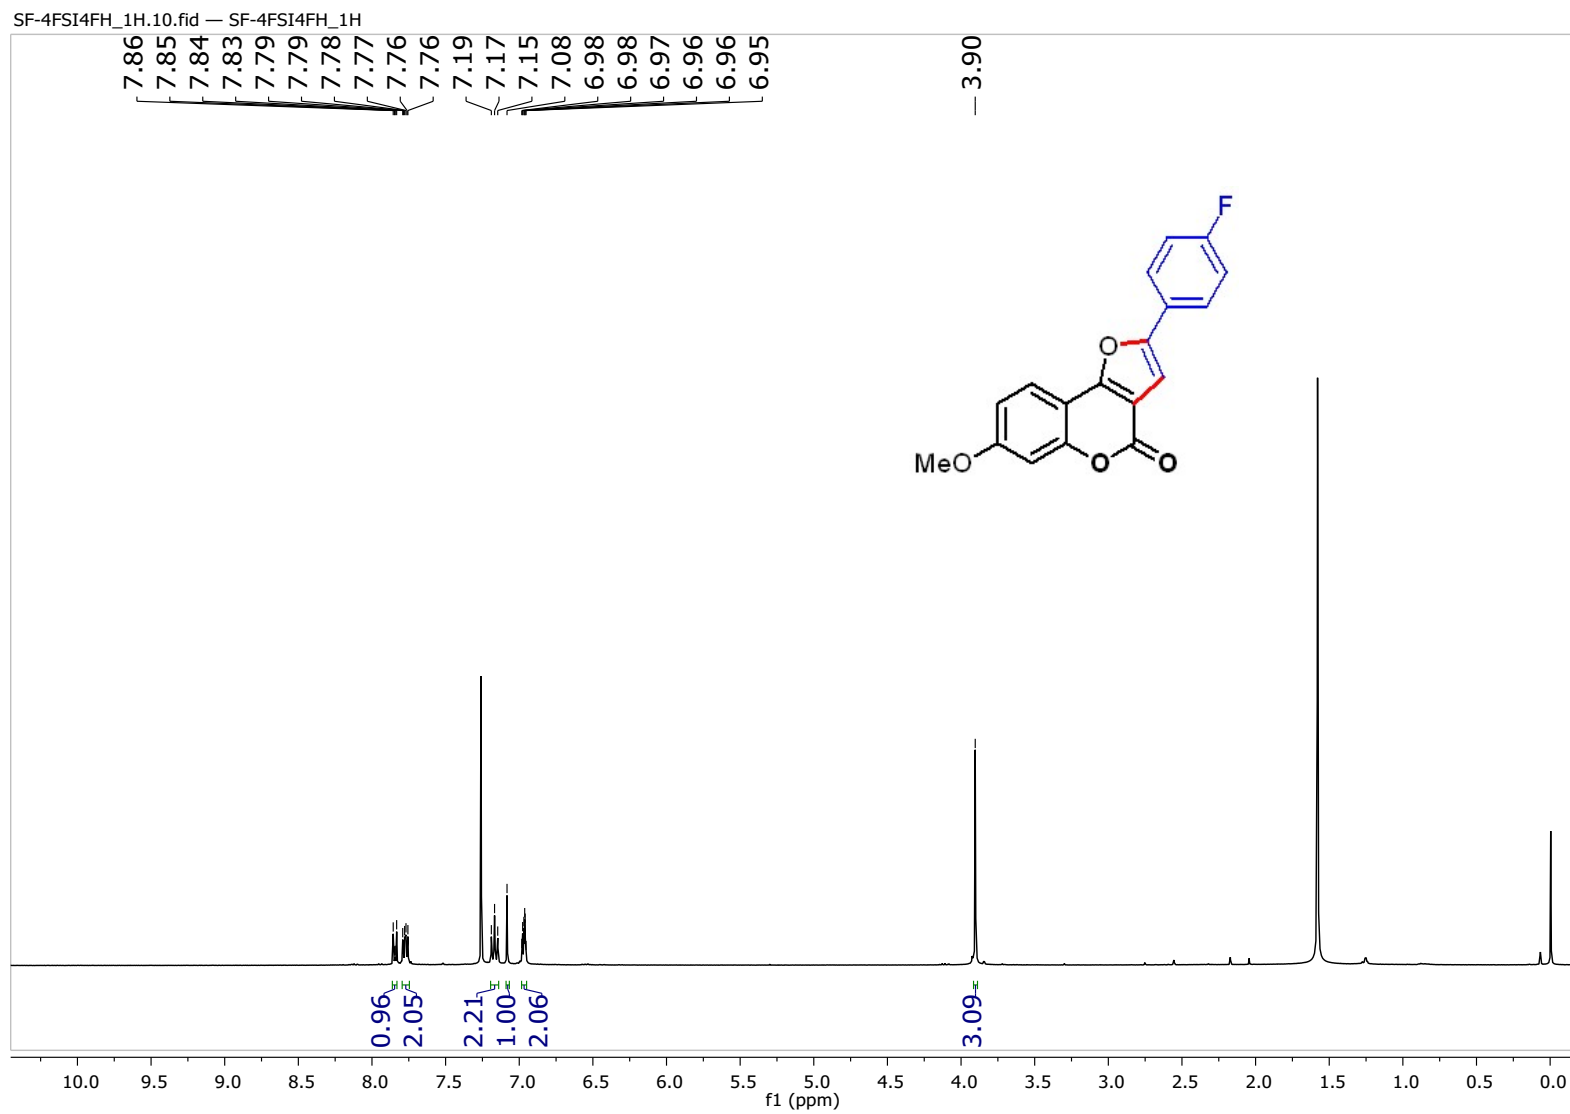

**<sup>13</sup>C NMR Spectrum of 2-(4-Fluorophenyl)-7-methoxy-4*H*-furo[3,2-*c*]chromen-4-one (3l)**

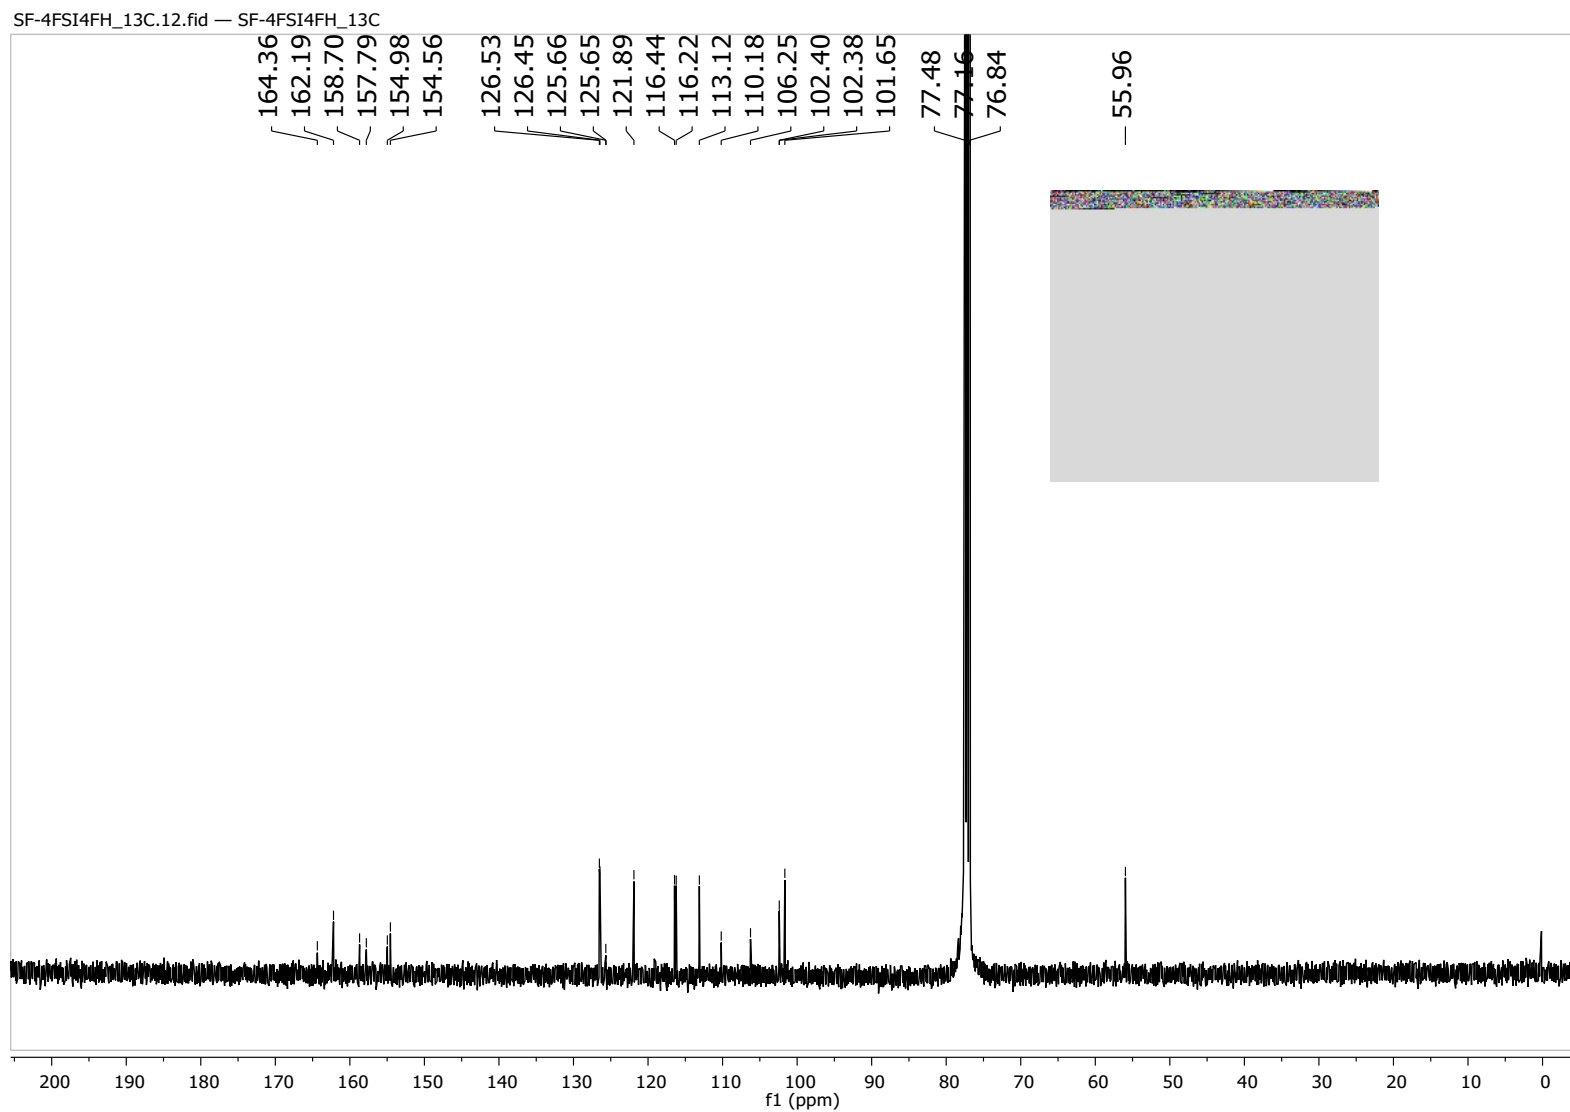

**<sup>19</sup>F NMR Spectrum of 2-(4-Fluorophenyl)-7-methoxy-4*H*-furo[3,2-*c*]chromen-4-one (31)**

SF-4FSI4FH\_19F.14.fid — SF-4FSI4FH\_19F

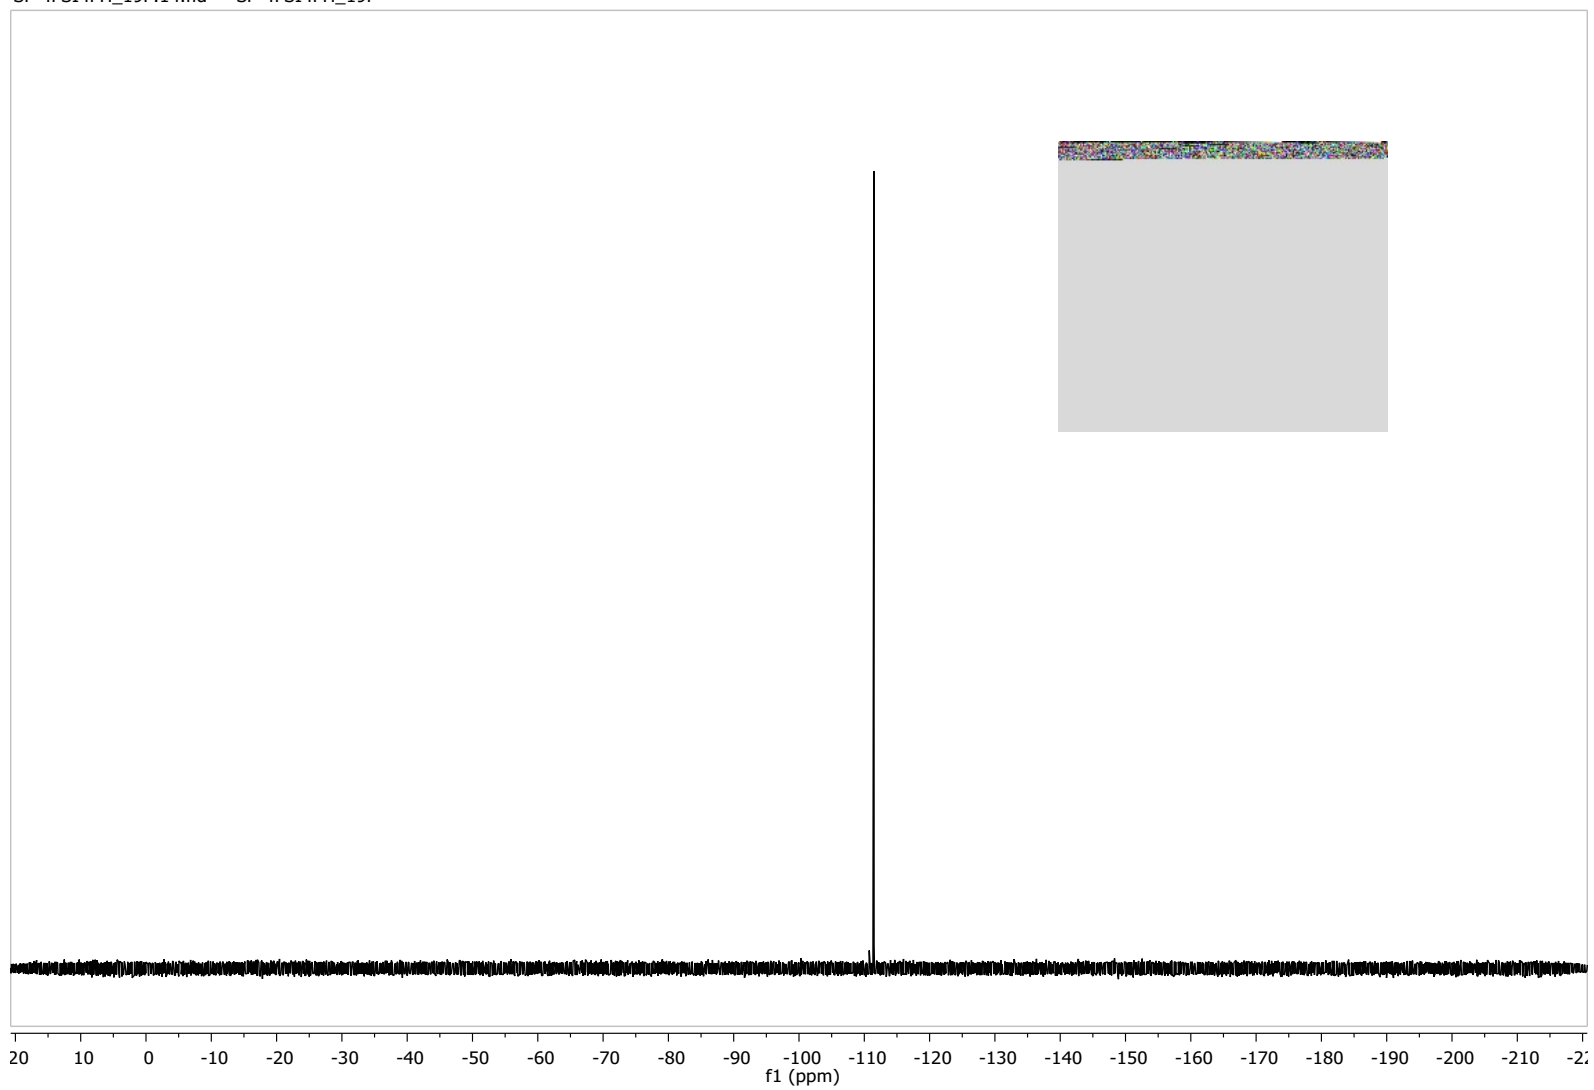



## HRMS Spectrum of 2-(4-Fluorophenyl)-7-methoxy-4H-furo[3,2-c]chromen-4-one (3l)

|                    |                       |                               |         |                        |                                 |
|--------------------|-----------------------|-------------------------------|---------|------------------------|---------------------------------|
| <b>Sample Name</b> | Sample1               | <b>Position</b>               | P1-A1   | <b>Instrument Name</b> | QTOF                            |
| <b>User Name</b>   | SYSTEM (SYSTEM)       | <b>Inj Vol</b>                | 5       | <b>InjPosition</b>     |                                 |
| <b>Sample Type</b> | Sample                | <b>IRM Calibration Status</b> | Success | <b>Data Filename</b>   | SFR611.d                        |
| <b>ACQ Method</b>  | DIRECT MASS_ACN1500.m | <b>Comment</b>                |         | <b>Acquired Time</b>   | 19-07-2023 16:39:03 (UTC+05:30) |

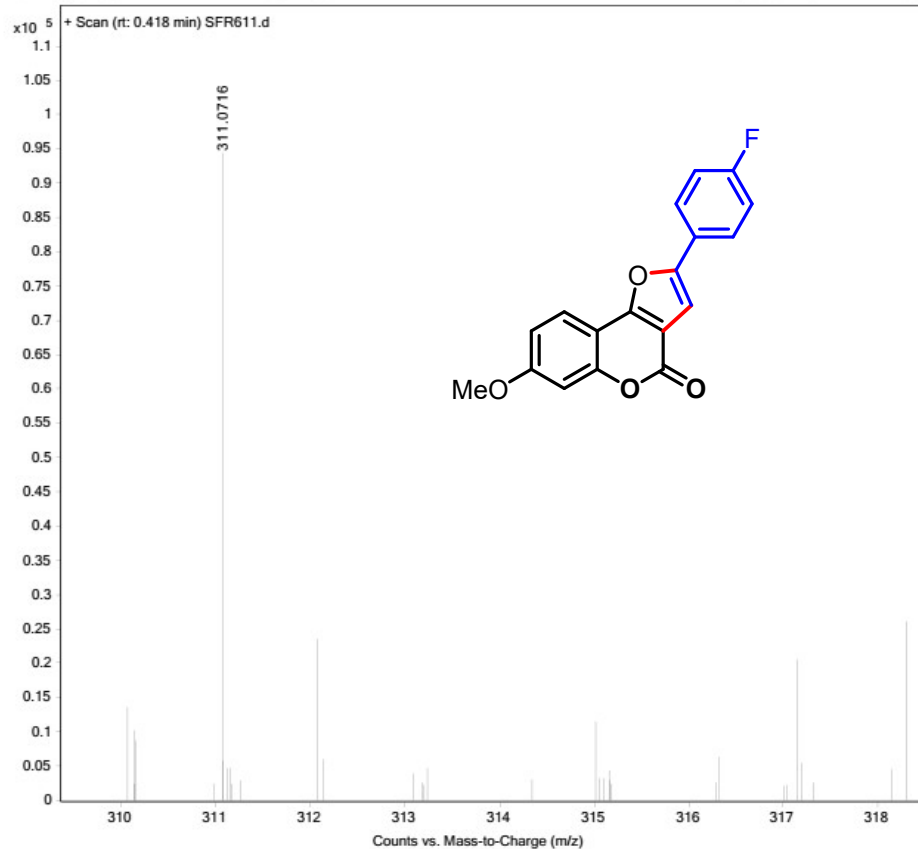

# <sup>1</sup>H NMR Spectrum of 2-(4-Chlorophenyl)-7-methoxy-4H-furo[3,2-c]chromen-4-one (3m)

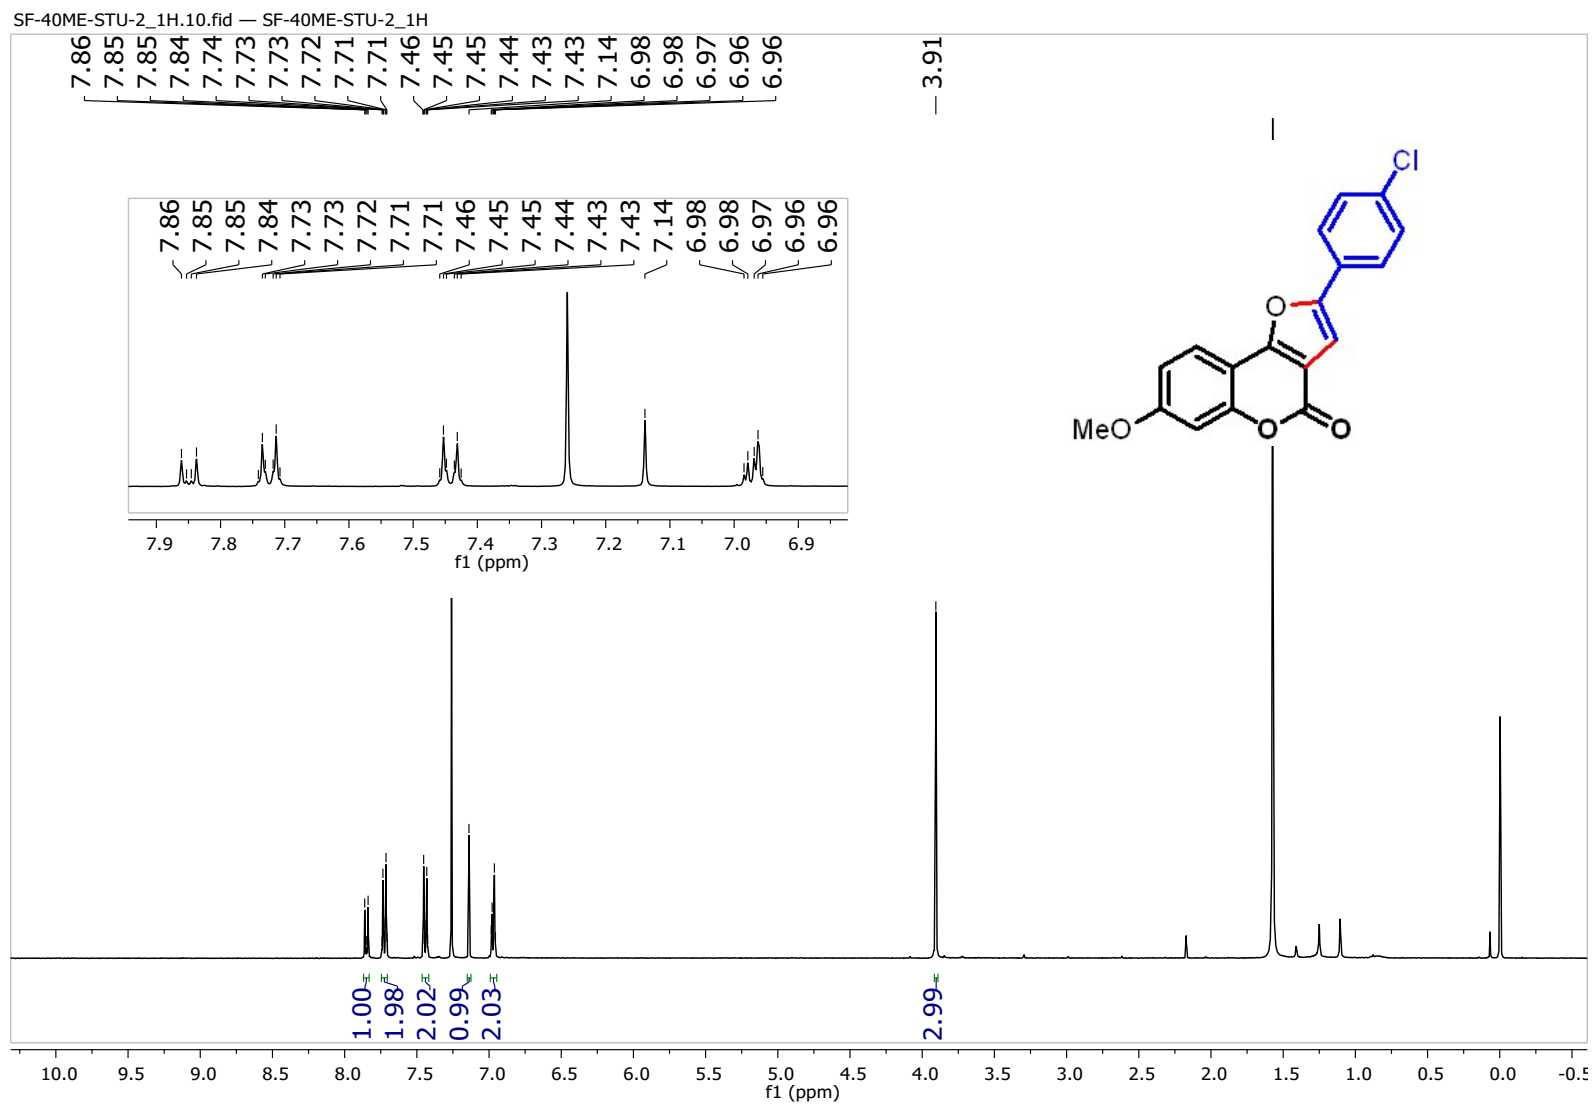

**<sup>13</sup>C NMR Spectrum of 2-(4-Chlorophenyl)-7-methoxy-4*H*-furo[3,2-*c*]chromen-4-one (3m)**

SF-40ME-STU-2\_13C.12.fid — SF-40ME-STU-2\_13C

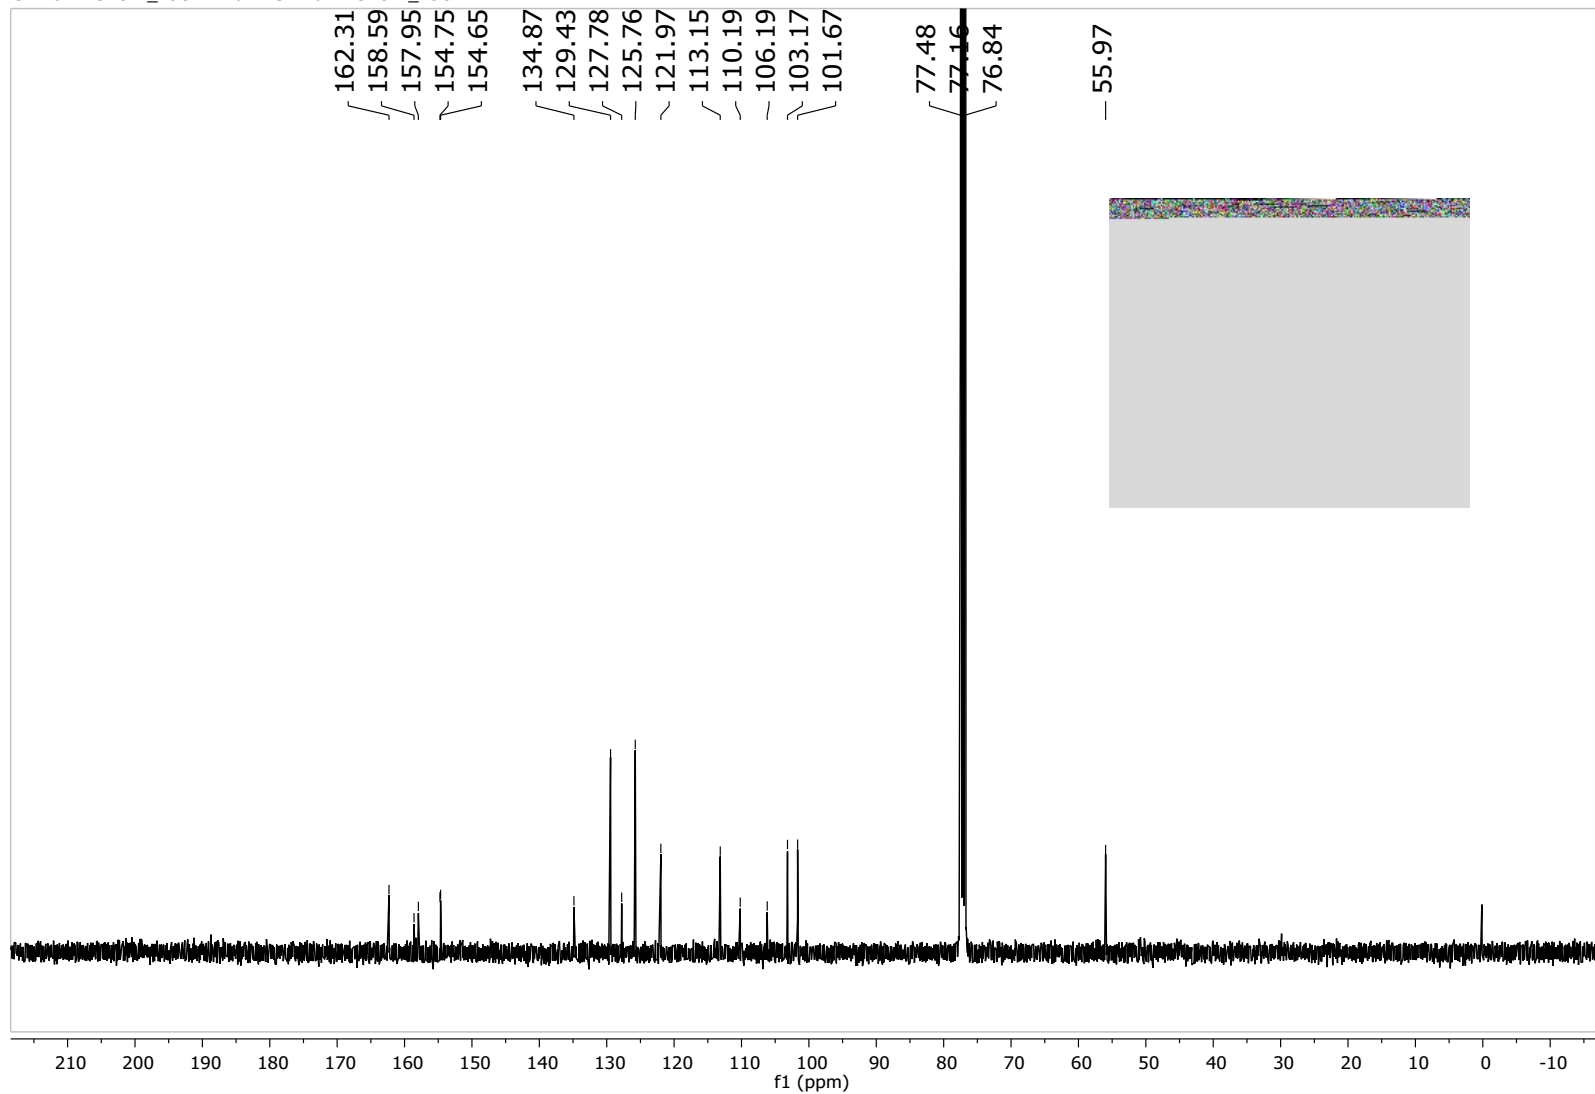

## HRMS Spectrum of 2-(4-Chlorophenyl)-7-methoxy-4*H*-furo[3,2-*c*]chromen-4-one (3m)

|             |                                 |                        |         |                 |                                 |
|-------------|---------------------------------|------------------------|---------|-----------------|---------------------------------|
| Sample Name | Sample19                        | Position               | P1-B8   | Instrument Name | QTOF                            |
| User Name   | SYSTEM (SYSTEM)                 | Inj Vol                | 5       | InjPosition     |                                 |
| Sample Type | Sample                          | IRM Calibration Status | Success | Data Filename   | SFK 291.d                       |
| ACQ Method  | DIRECT MASS_POSITIVE_100_1500.m | Comment                |         | Acquired Time   | 03-07-2023 10:23:47 (UTC+05:30) |

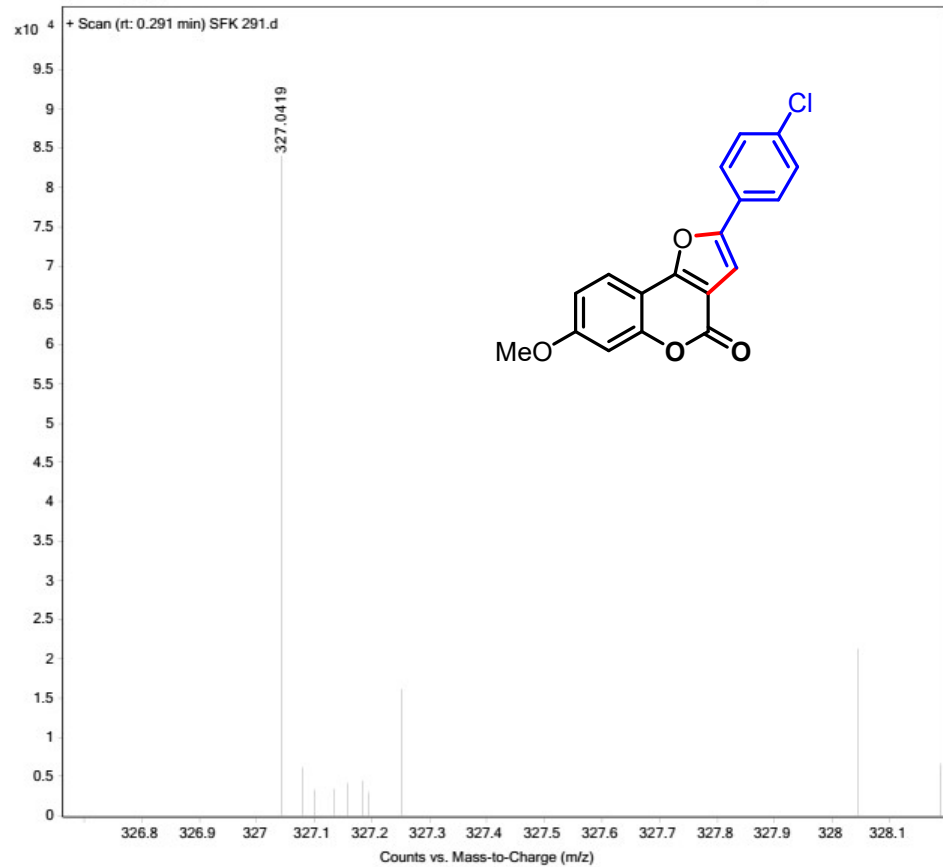

**<sup>1</sup>H NMR Spectrum of 7-Methoxy-2-(*p*-tolyl)-4*H*-furo[3,2-*c*]chromen-4-one (3n)**

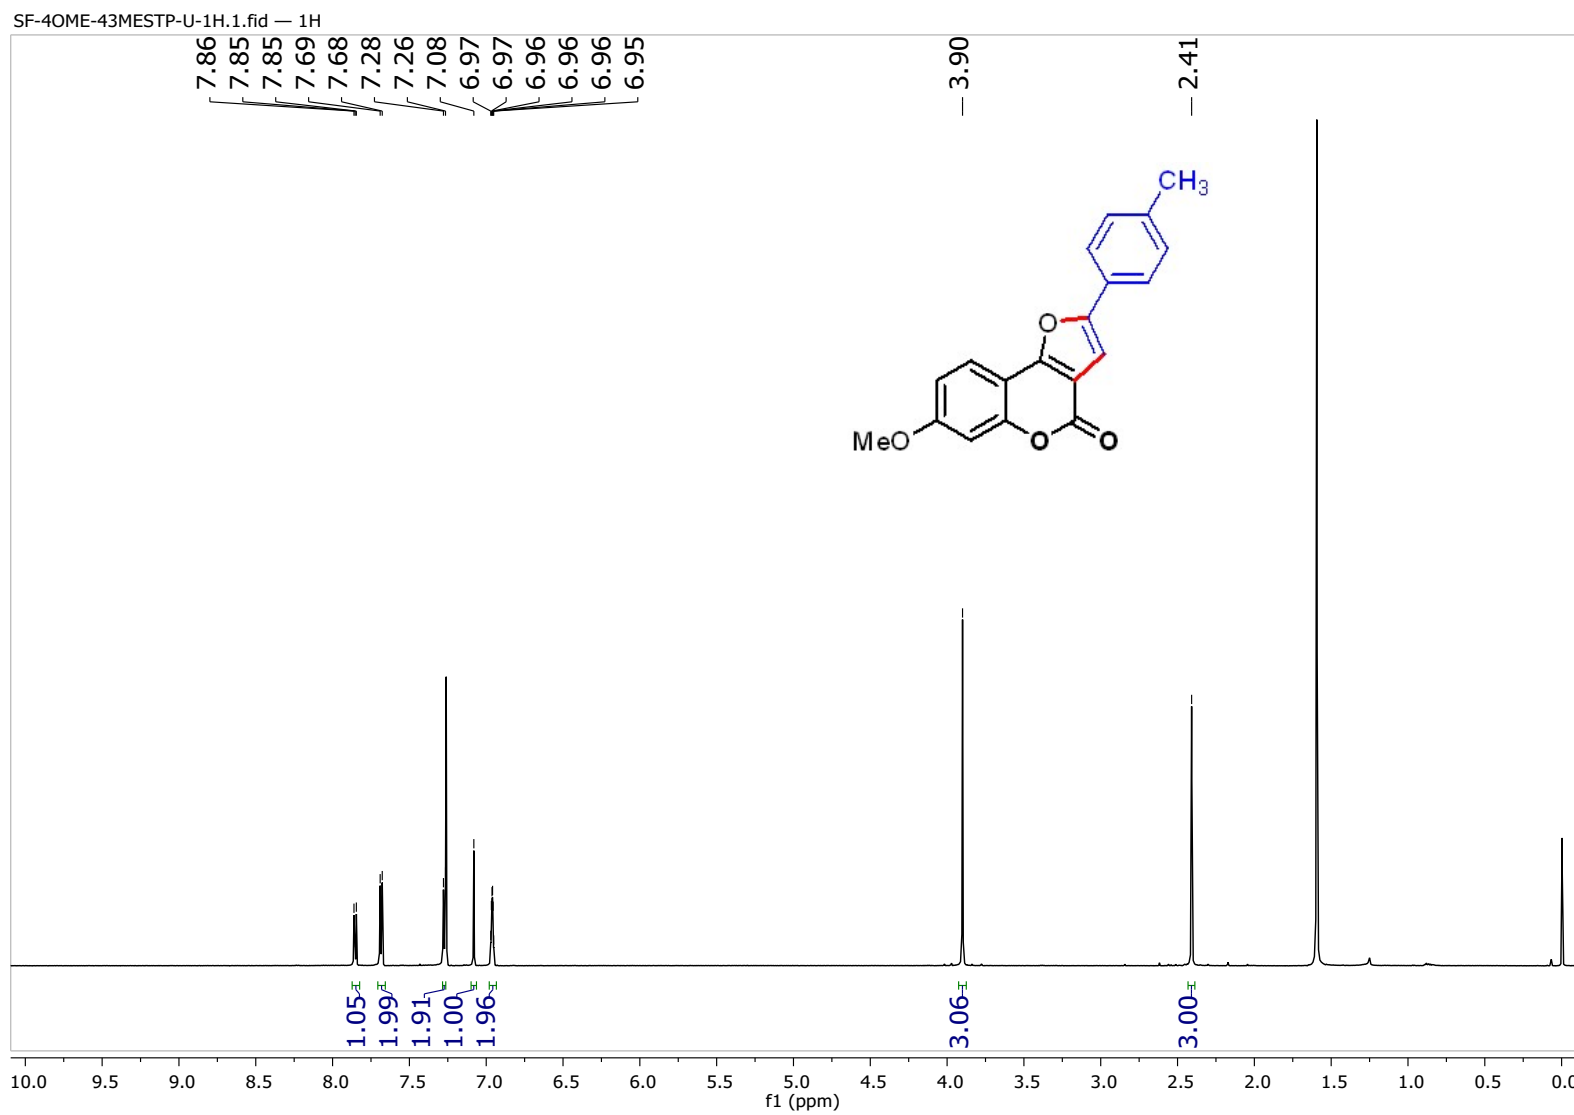

**<sup>13</sup>C NMR Spectrum of 7-Methoxy-2-(*p*-tolyl)-4*H*-furo[3,2-*c*]chromen-4-one (3n)**

SF-4OME-43MESTP-U-13C.1.fid — 13C

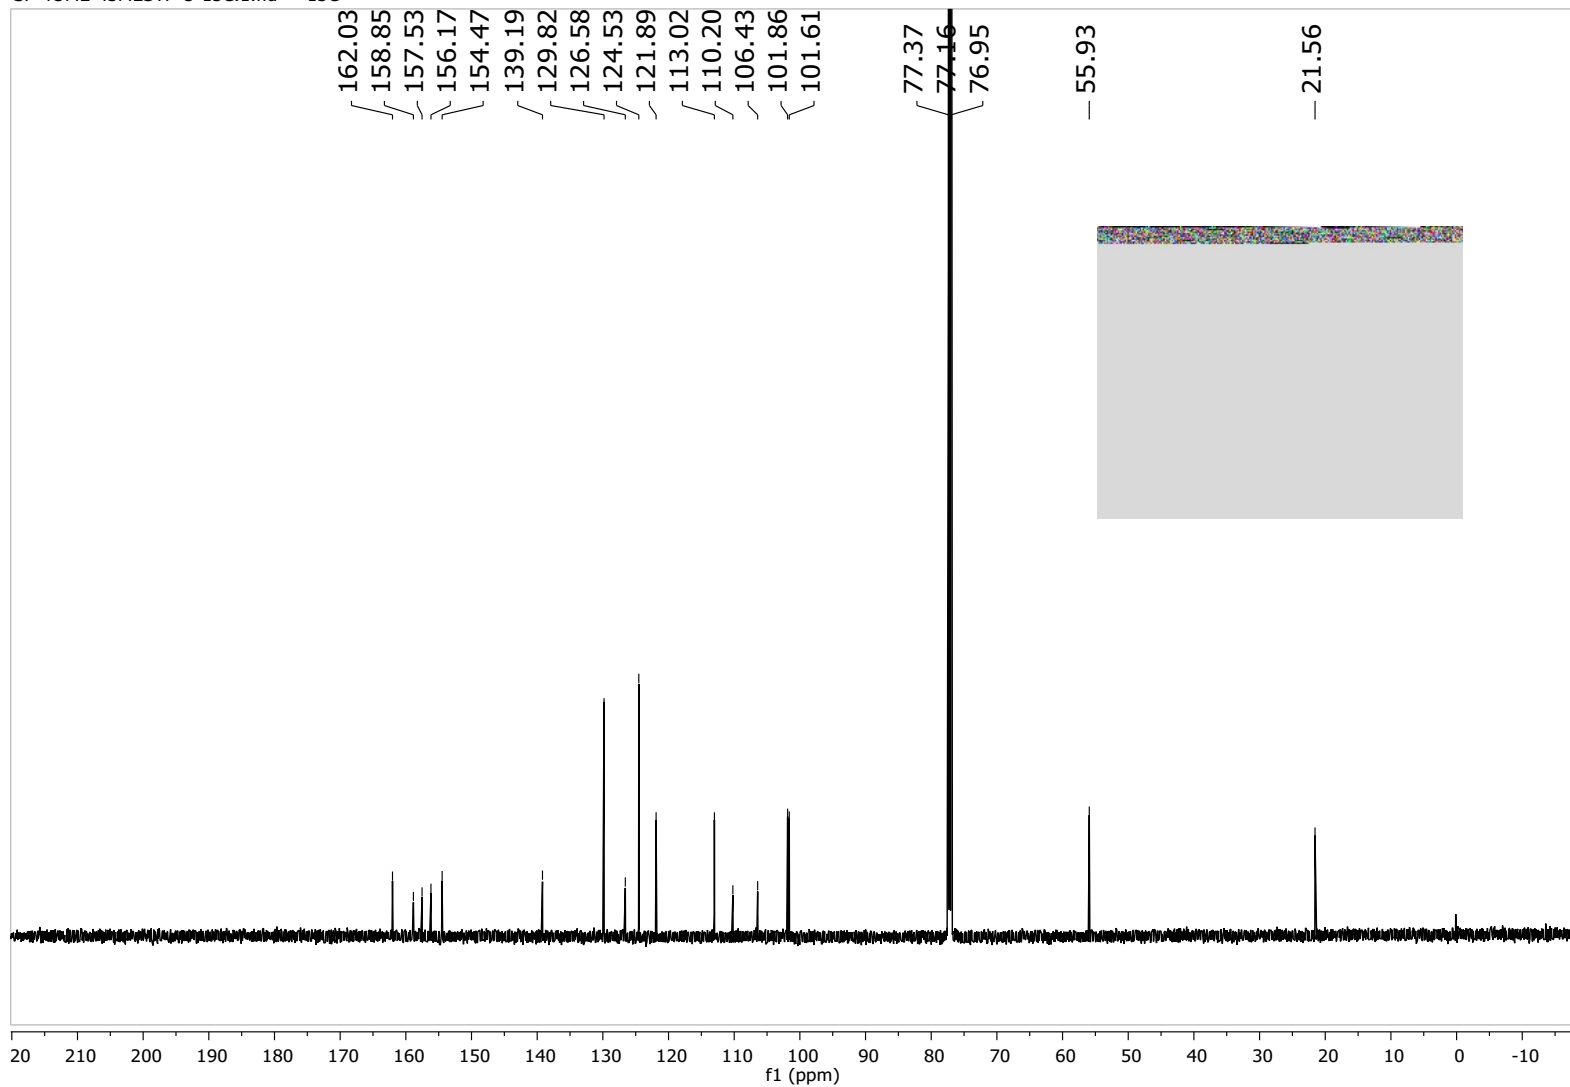

## HRMS Spectrum of 7-Methoxy-2-(*p*-tolyl)-4*H*-furo[3,2-*c*]chromen-4-one (3n)

|                    |                             |                               |         |                        |                                 |
|--------------------|-----------------------------|-------------------------------|---------|------------------------|---------------------------------|
| <b>Sample Name</b> | Sample6                     | <b>Position</b>               | P1-A6   | <b>Instrument Name</b> | QTOF                            |
| <b>User Name</b>   | SYSTEM (SYSTEM)             | <b>Inj Vol</b>                | 5       | <b>InjPosition</b>     |                                 |
| <b>Sample Type</b> | Sample                      | <b>IRM Calibration Status</b> | Success | <b>Data Filename</b>   | SF6551.d                        |
| <b>ACQ Method</b>  | DIRECT MASS_POSITIVE_01_1.m | <b>Comment</b>                |         | <b>Acquired Time</b>   | 13-07-2023 10:58:12 (UTC+05:30) |

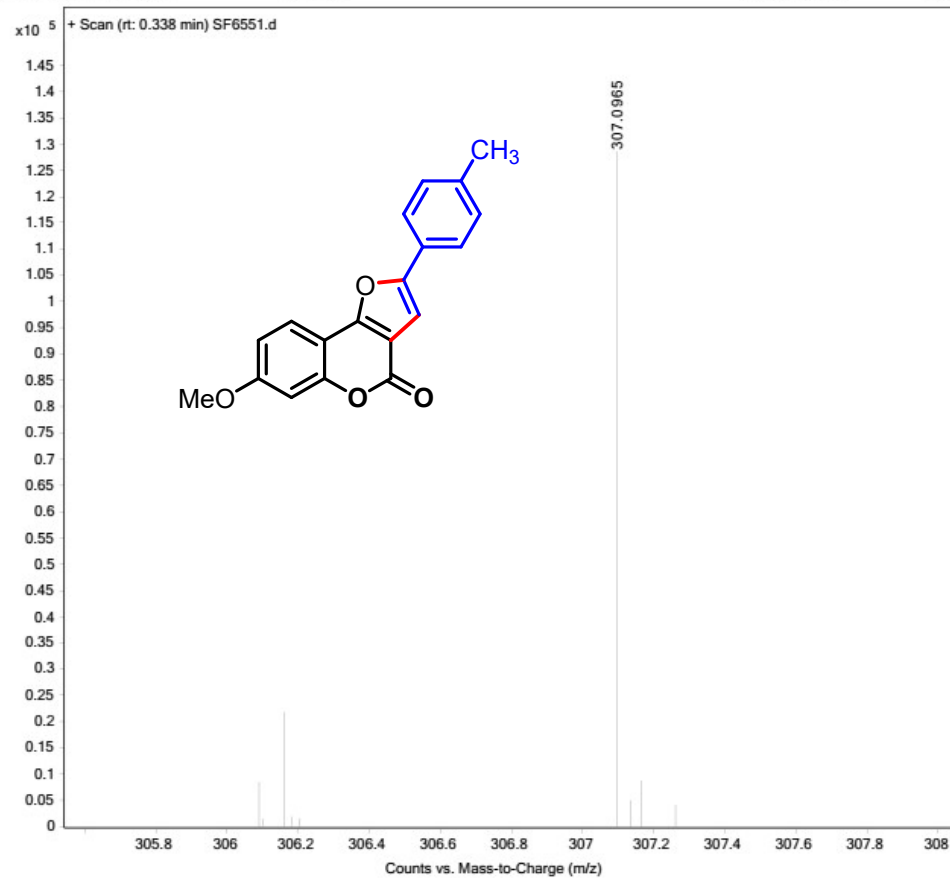

# <sup>1</sup>H NMR Spectrum of 7-Methoxy-2-(*m*-tolyl)-4*H*-furo[3,2-*c*]chromen-4-one (3o)

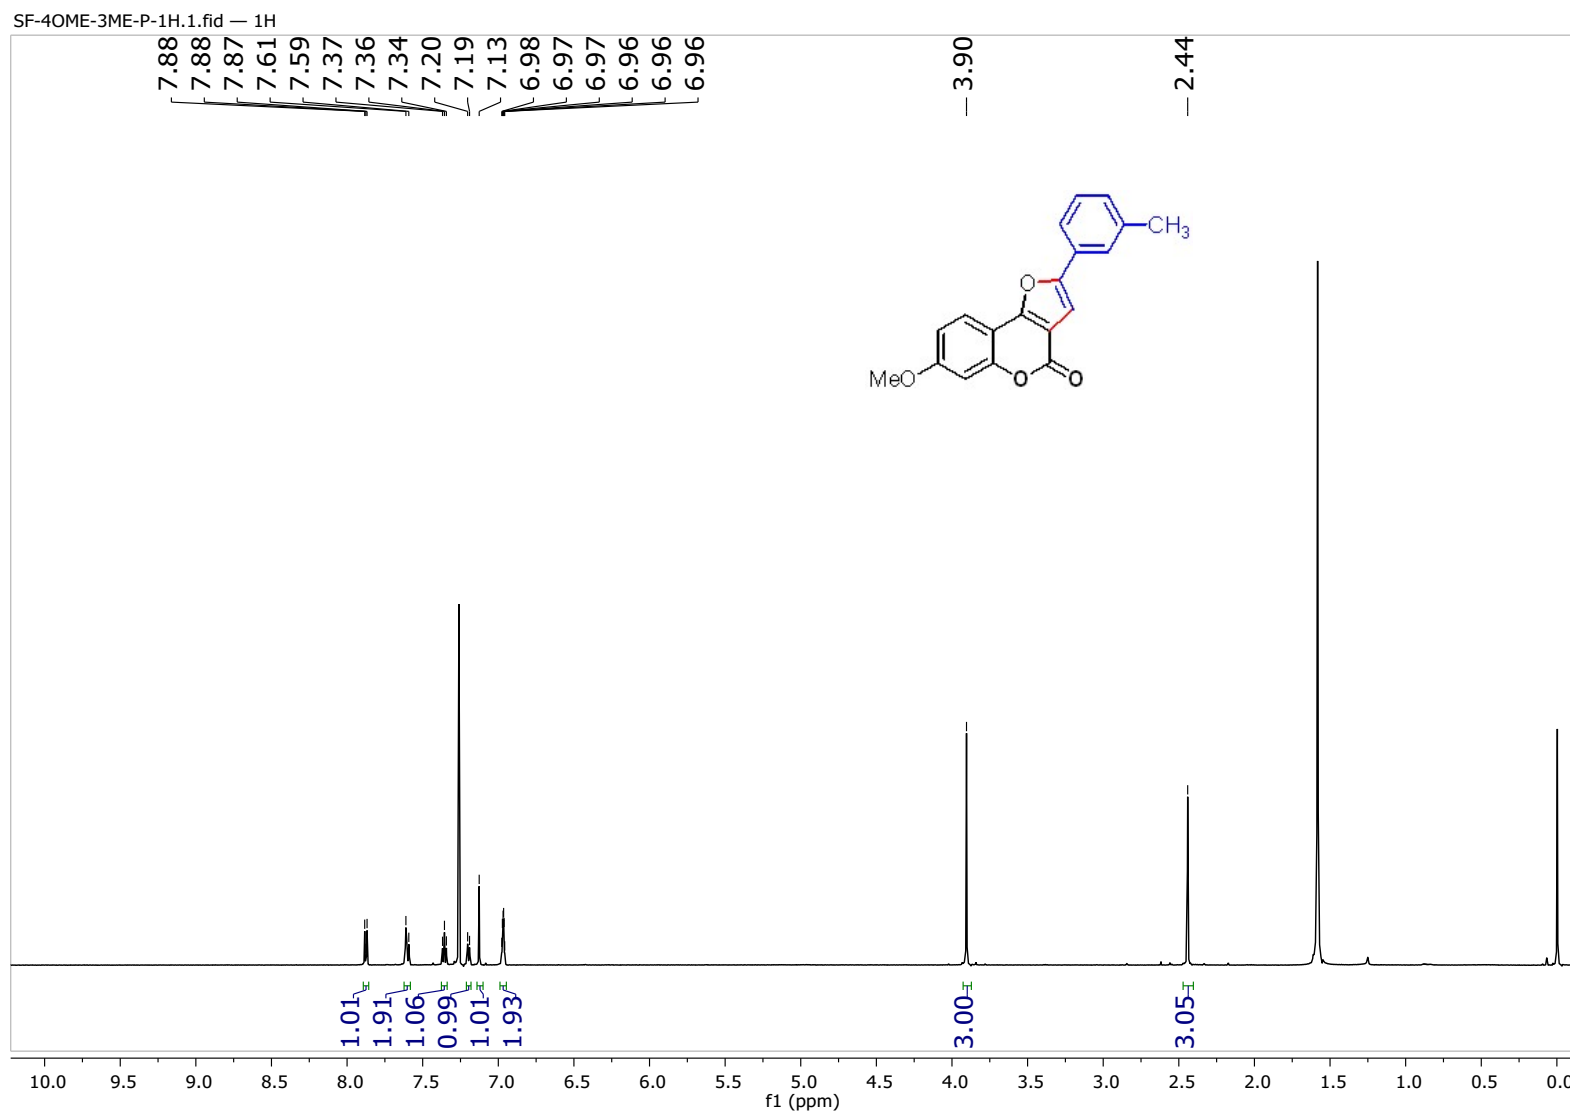



**<sup>13</sup>C NMR Spectrum of 7-Methoxy-2-(*m*-tolyl)-4*H*-furo[3,2-*c*]chromen-4-one (3o)**

SF-4OME-3ME-P-13C.3.fid — 13C

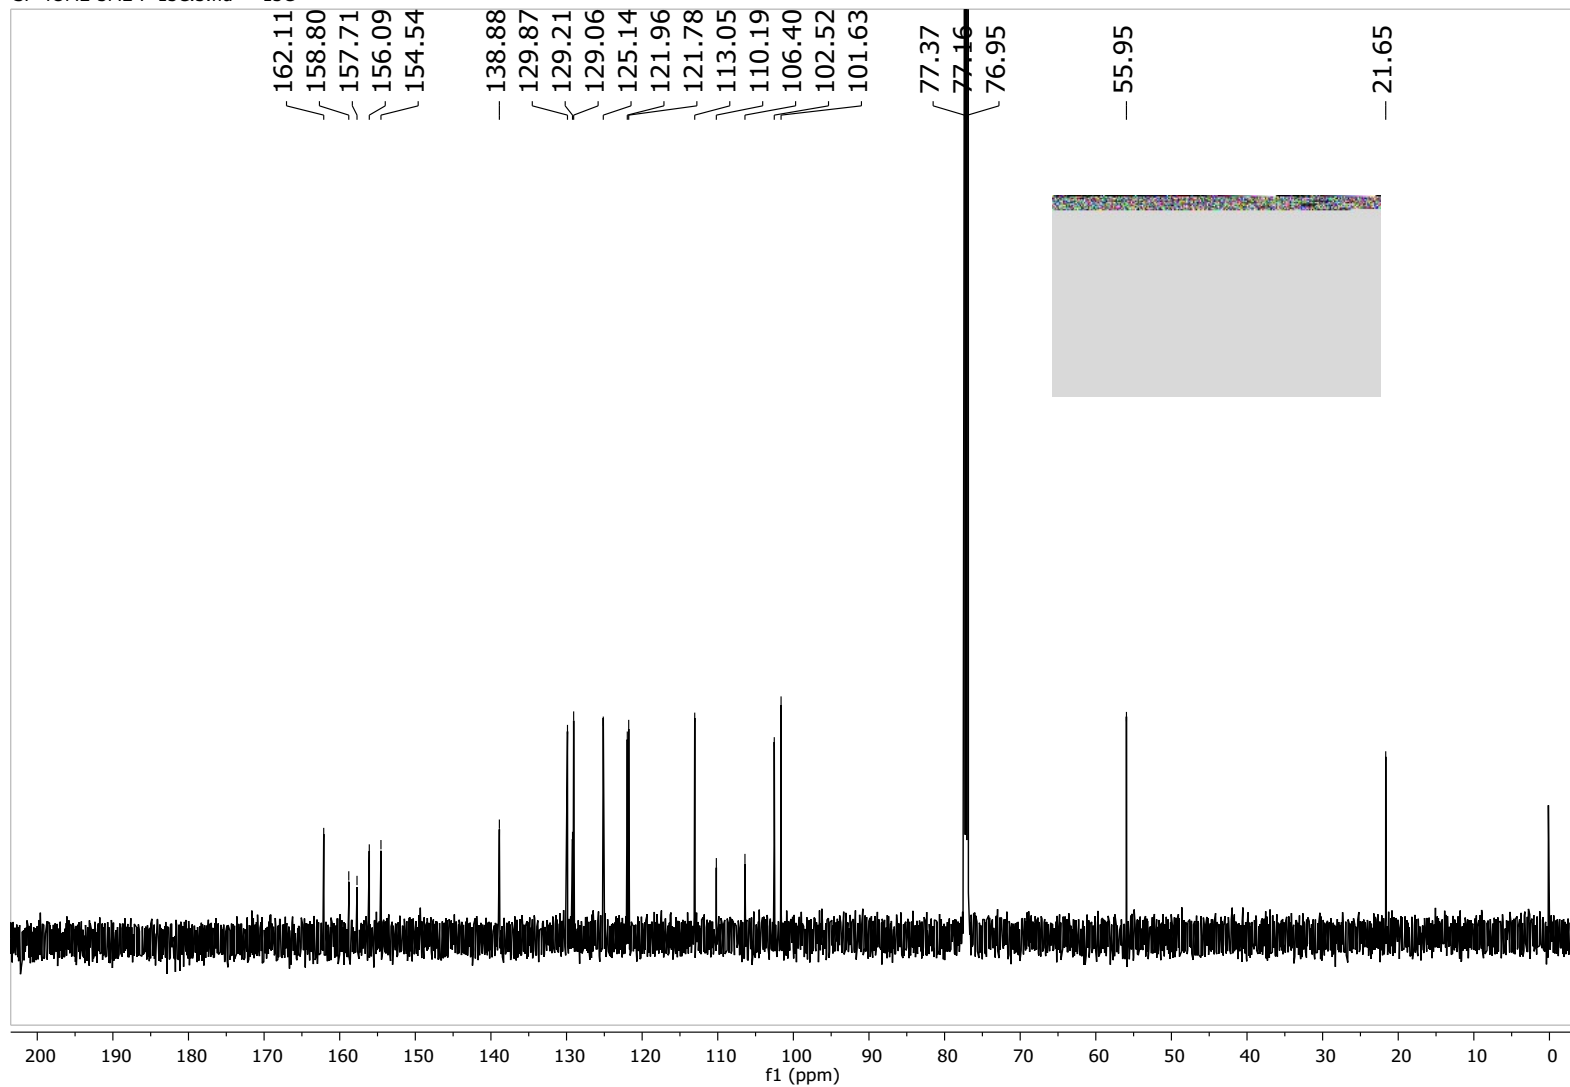

## HRMS Spectrum of 7-Methoxy-2-(*m*-tolyl)-4*H*-furo[3,2-*c*]chromen-4-one (3o)

|                    |                             |                               |         |                        |                                 |
|--------------------|-----------------------------|-------------------------------|---------|------------------------|---------------------------------|
| <b>Sample Name</b> | Sample7                     | <b>Position</b>               | P1-A7   | <b>Instrument Name</b> | QTOF                            |
| <b>User Name</b>   | SYSTEM (SYSTEM)             | <b>Inj Vol</b>                | 5       | <b>InjPosition</b>     |                                 |
| <b>Sample Type</b> | Sample                      | <b>IRM Calibration Status</b> | Success | <b>Data Filename</b>   | SF6552.d                        |
| <b>ACQ Method</b>  | DIRECT MASS_POSITIVE_01_1.m | <b>Comment</b>                |         | <b>Acquired Time</b>   | 13-07-2023 11:00:16 (UTC+05:30) |

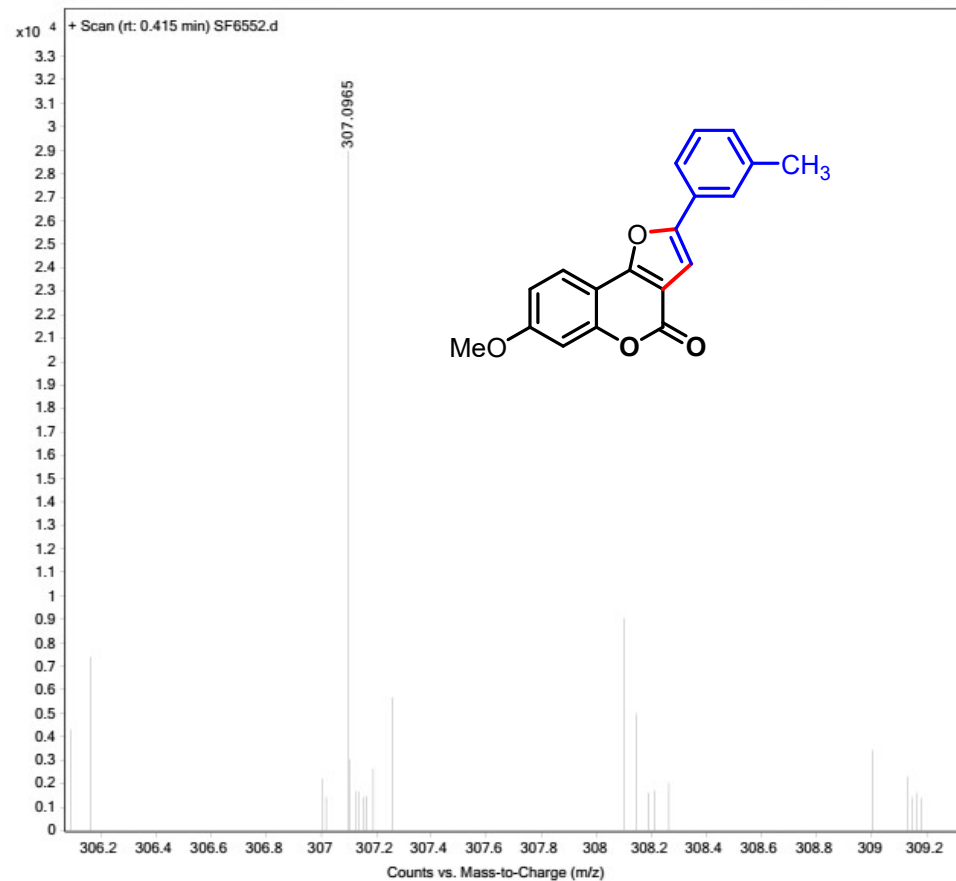

# <sup>1</sup>H NMR Spectrum of 8-Chloro-2-phenyl-4H-furo[3,2-c]chromen-4-one (3p)

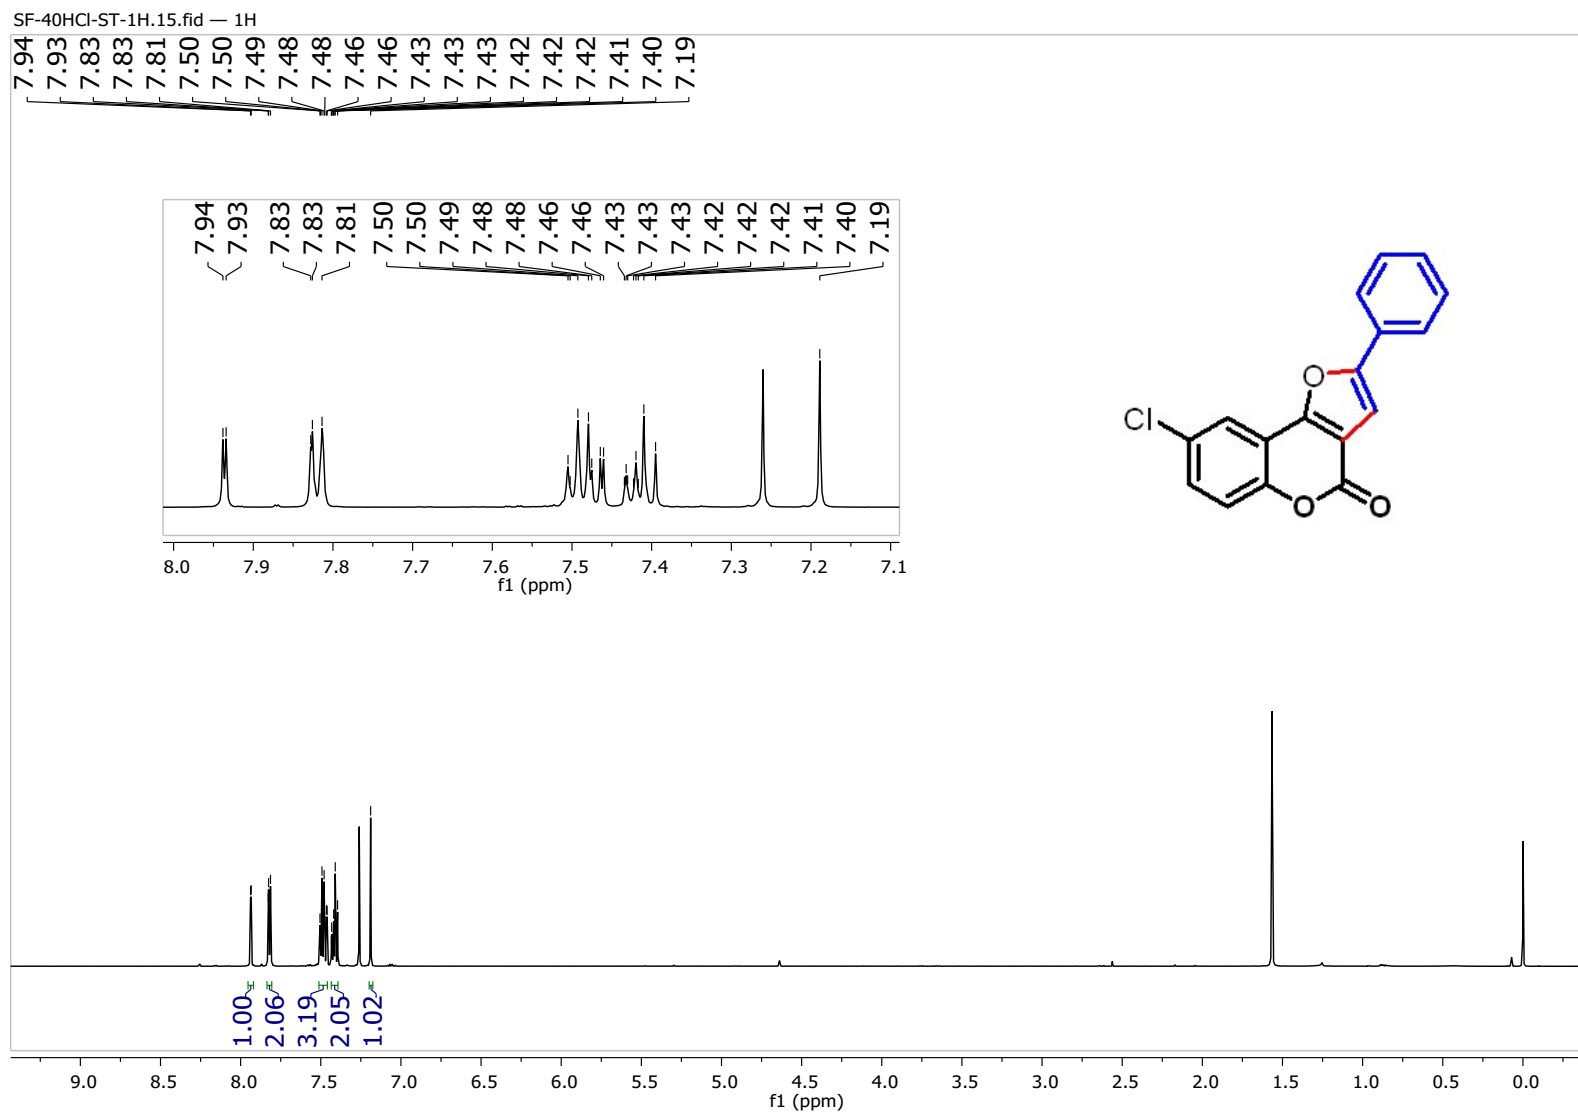

**<sup>13</sup>C NMR Spectrum of 8-Chloro-2-phenyl-4*H*-furo[3,2-*c*]chromen-4-one (3p)**

SF-40HCl-ST-13C.17.fid — 13C

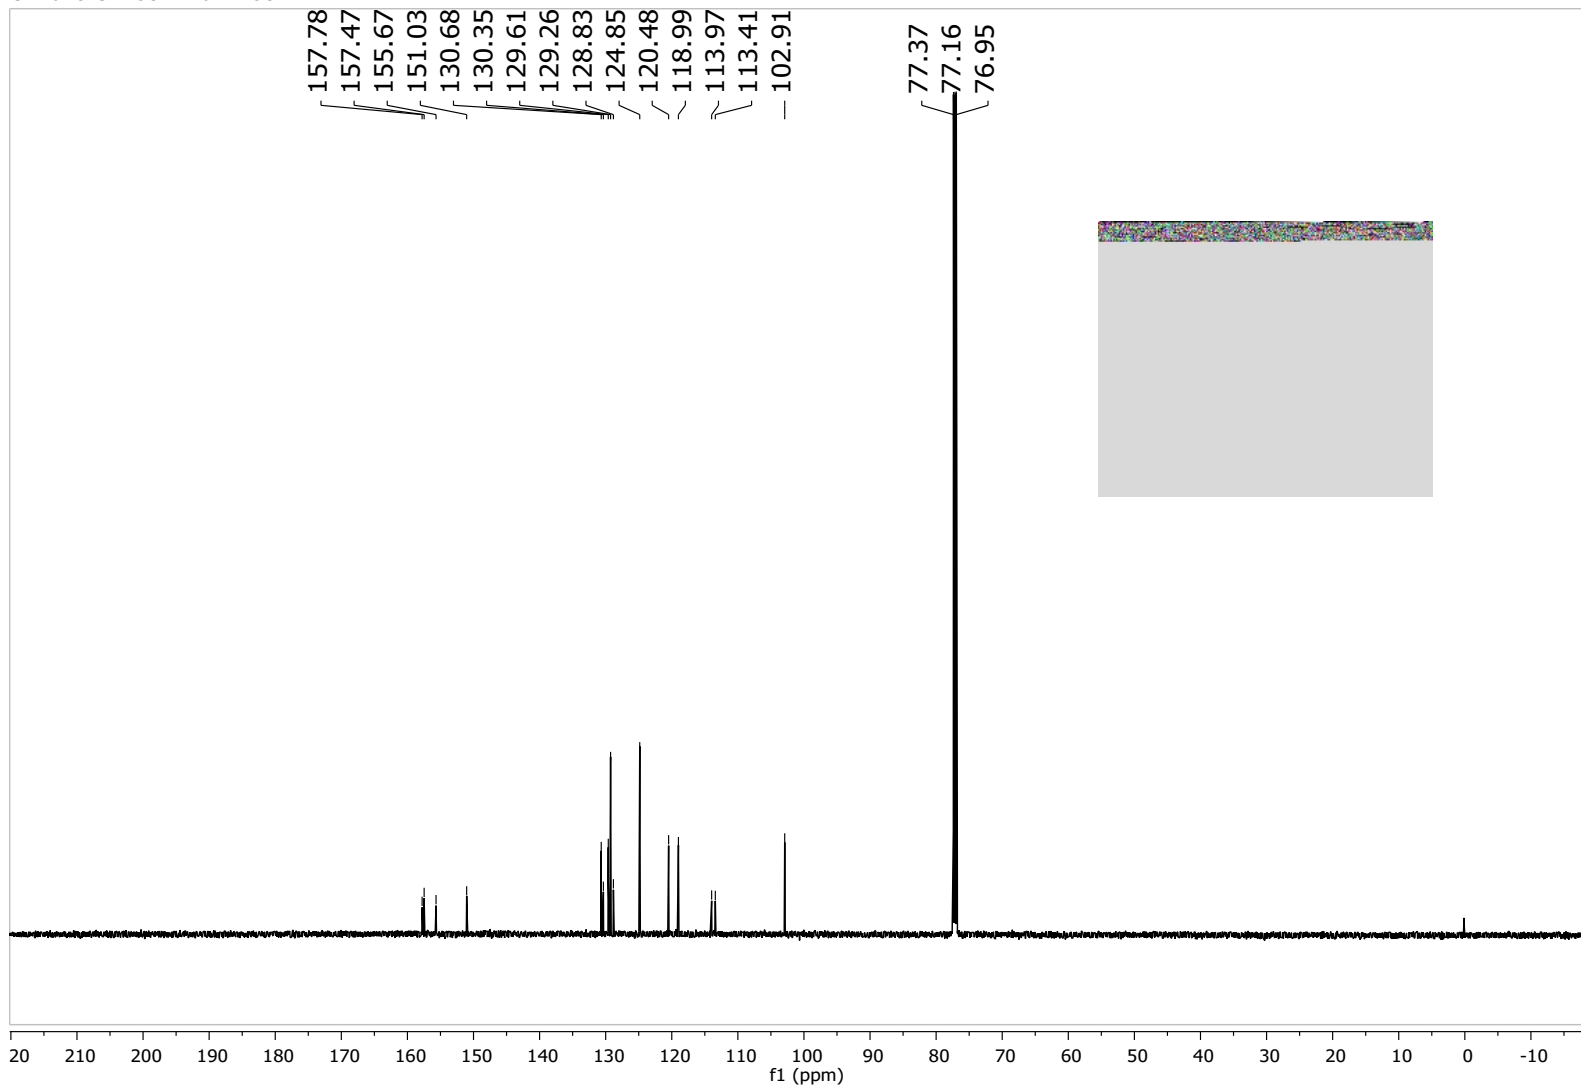

## HRMS Spectrum of 8-Chloro-2-phenyl-4*H*-furo[3,2-*c*]chromen-4-one (3p)

|                    |                                 |                               |         |                        |                                 |
|--------------------|---------------------------------|-------------------------------|---------|------------------------|---------------------------------|
| <b>Sample Name</b> | Sample13                        | <b>Position</b>               | P1-B1   | <b>Instrument Name</b> | QTOF                            |
| <b>User Name</b>   | SYSTEM (SYSTEM)                 | <b>Inj Vol</b>                | 5       | <b>InjPosition</b>     |                                 |
| <b>Sample Type</b> | Sample                          | <b>IRM Calibration Status</b> | Success | <b>Data Filename</b>   | sf6355.d                        |
| <b>ACQ Method</b>  | DIRECT MASS_POSITIVE_100_1500.m | <b>Comment</b>                |         | <b>Acquired Time</b>   | 12-07-2023 15:18:08 (UTC+05:30) |

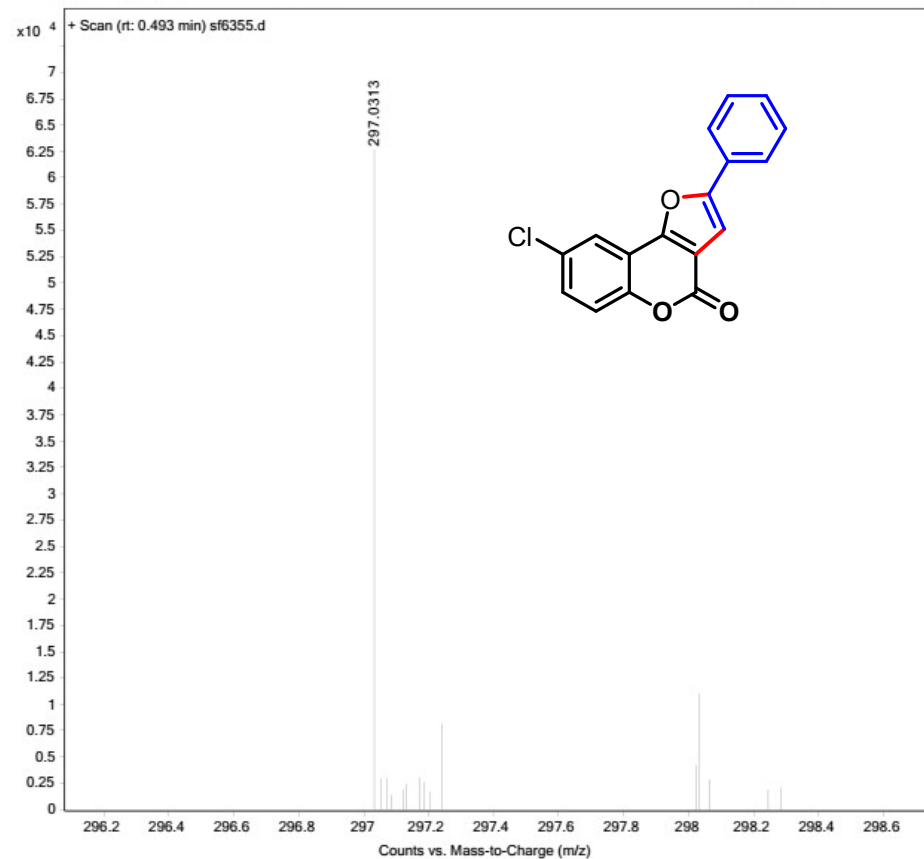

# <sup>1</sup>H NMR Spectrum of 8-Chloro-2-(4-fluorophenyl)-4H-furo[3,2-c]chromen-4-one (3q)

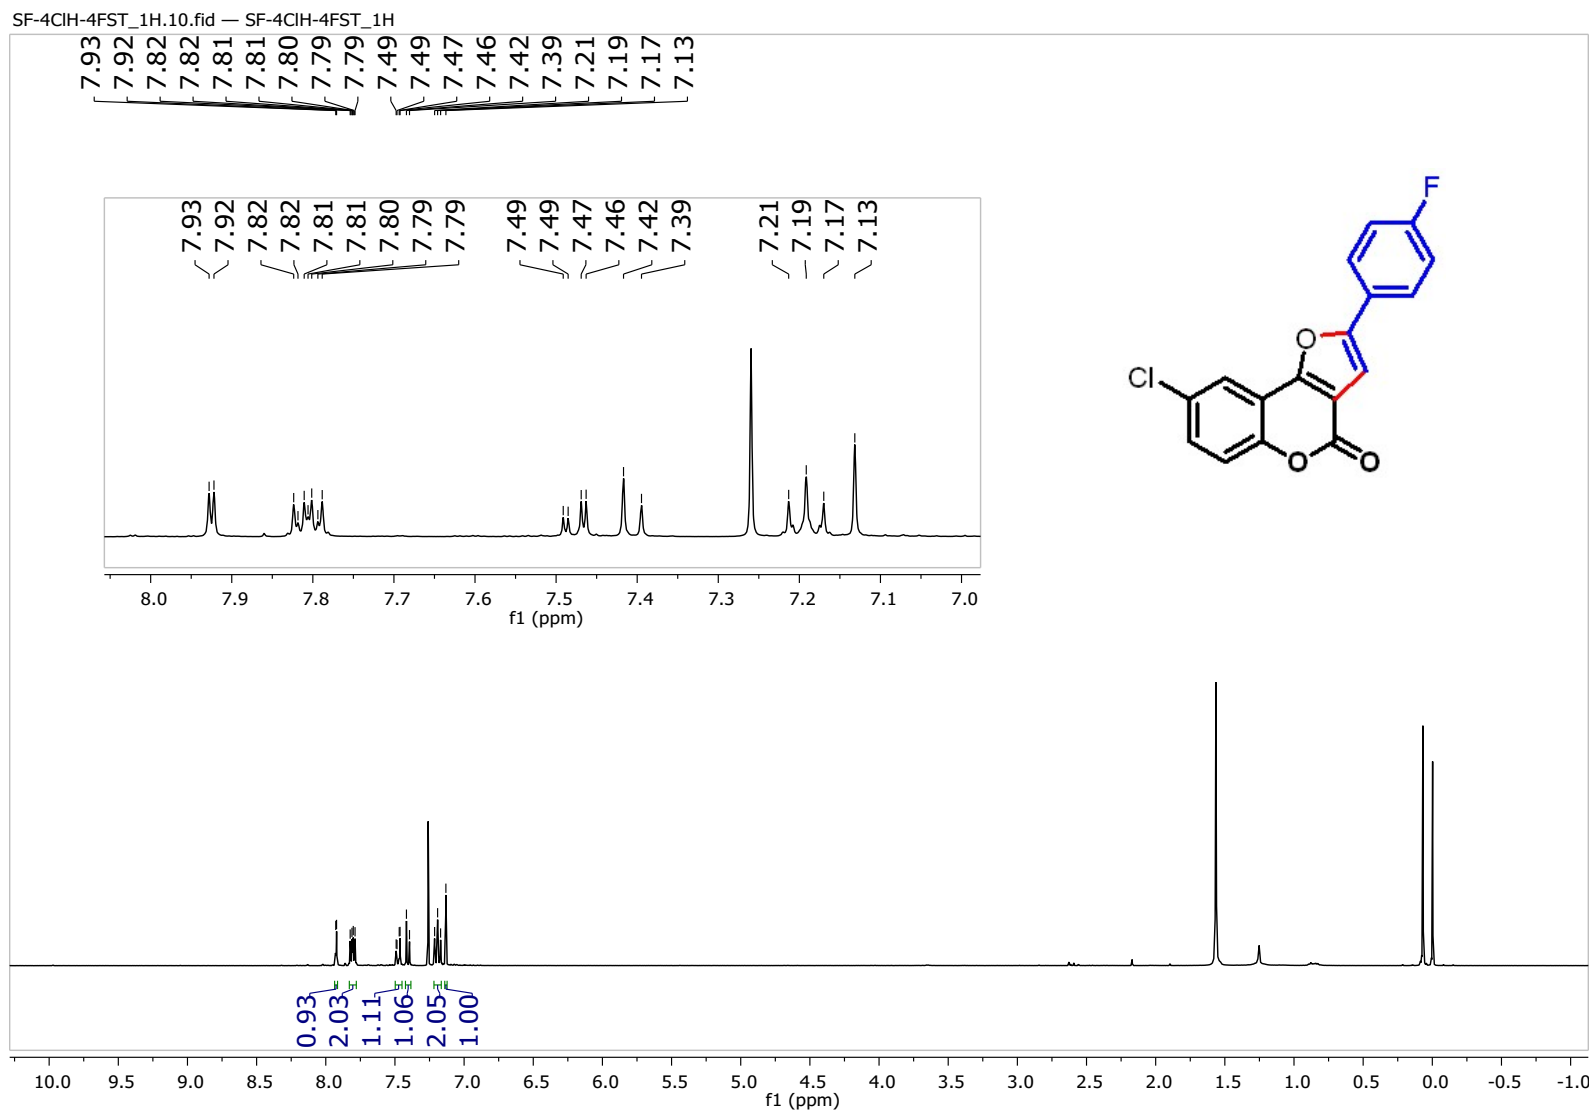

**<sup>13</sup>C NMR Spectrum of 8-Chloro-2-(4-fluorophenyl)-4H-furo[3,2-c]chromen-4-one (3q)**

SF-4CIH-4FST\_13C.12.fid — SF-4CIH-4FST\_13C

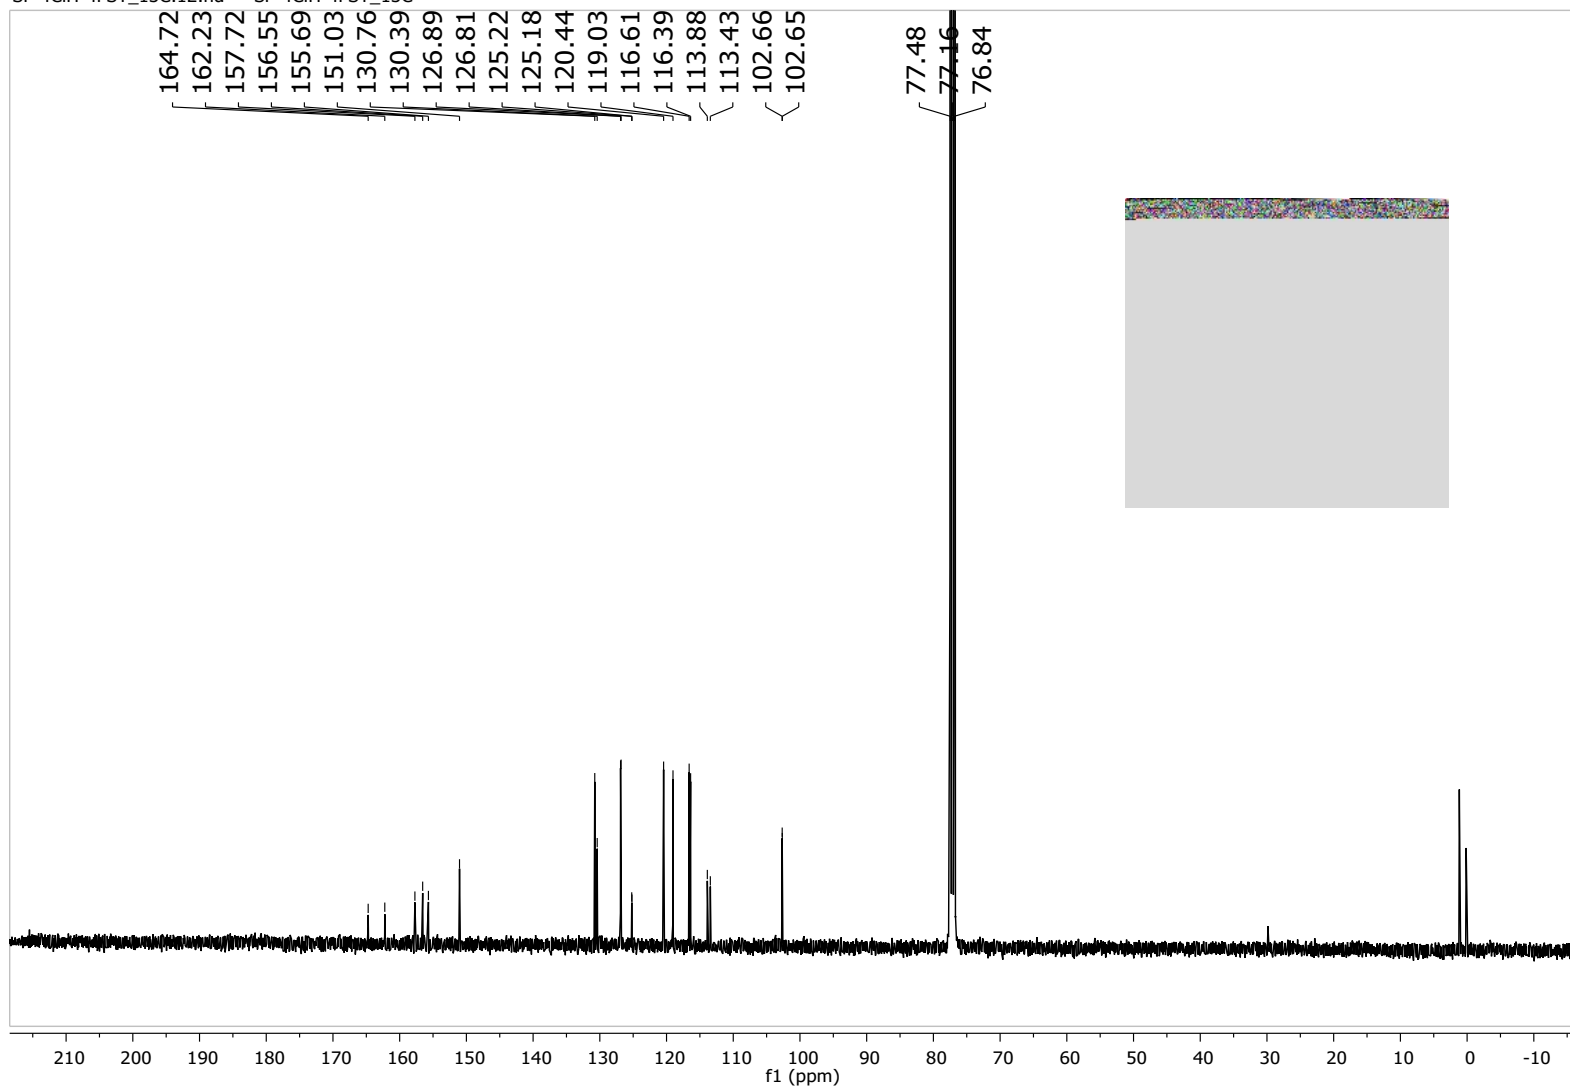

**<sup>19</sup>F NMR Spectrum of 8-Chloro-2-(4-fluorophenyl)-4*H*-furo[3,2-*c*]chromen-4-one (3q)**

SF-4CIH-4FST\_19F.14.fid — SF-4CIH-4FST\_19F

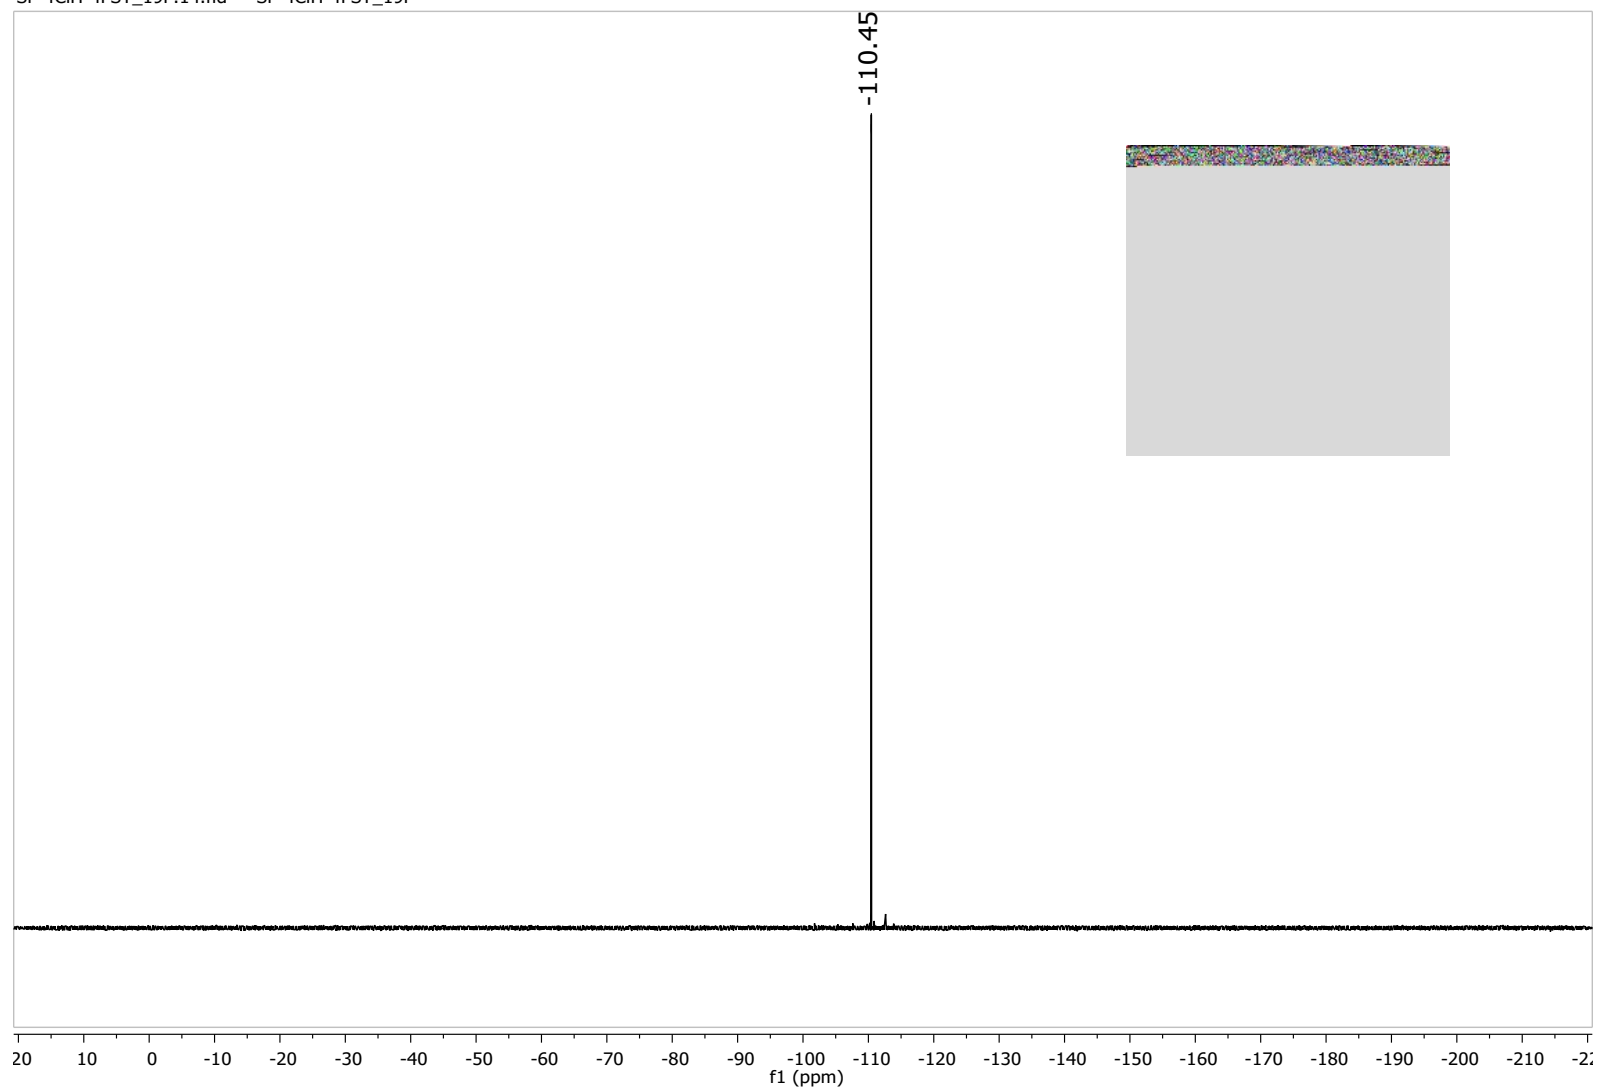



## HRMS Spectrum of 8-Chloro-2-(4-fluorophenyl)-4H-furo[3,2-c]chromen-4-one (3q)

|                    |                           |                               |         |                        |                                 |
|--------------------|---------------------------|-------------------------------|---------|------------------------|---------------------------------|
| <b>Sample Name</b> | Sample2                   | <b>Position</b>               | P1-A2   | <b>Instrument Name</b> | QTOF                            |
| <b>User Name</b>   | SYSTEM (SYSTEM)           | <b>Inj Vol</b>                | 5       | <b>InjPosition</b>     |                                 |
| <b>Sample Type</b> | Sample                    | <b>IRM Calibration Status</b> | Success | <b>Data Filename</b>   | SF24C21.d                       |
| <b>ACQ Method</b>  | DIRECT MASS_POSITIVE_01.m | <b>Comment</b>                |         | <b>Acquired Time</b>   | 18-04-2023 10:53:41 (UTC+05:30) |

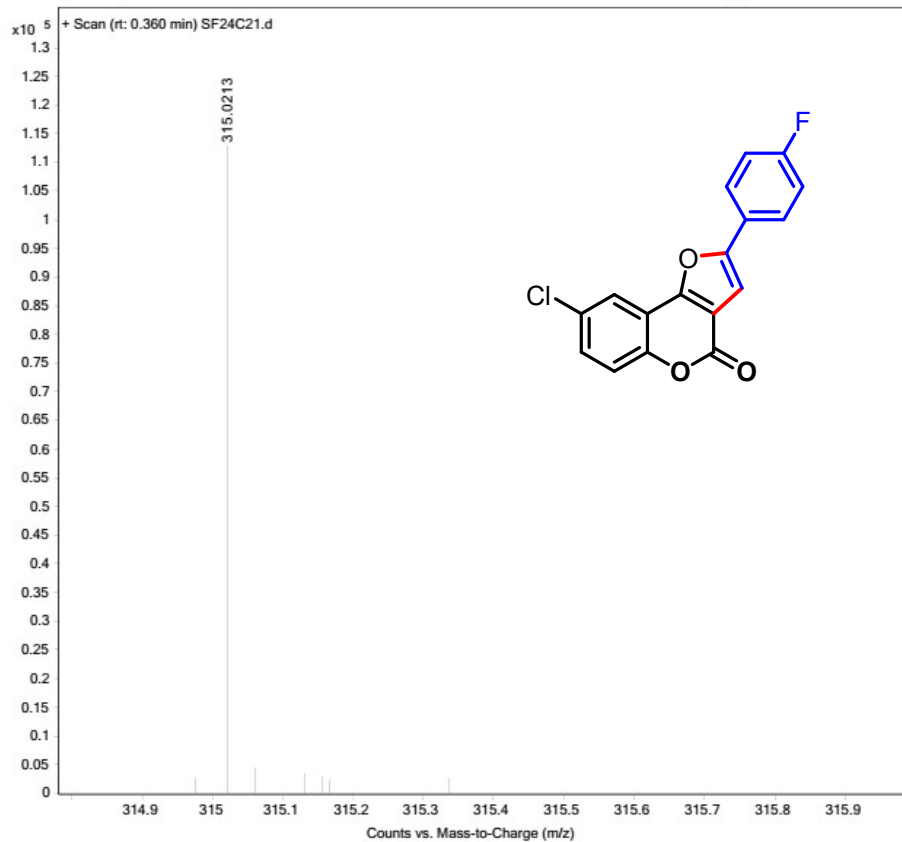

# <sup>1</sup>H NMR Spectrum of 8-Chloro-2-(4-chlorophenyl)-4H-furo[3,2-c]chromen-4-one (3r)

SF-4CLH-CLST-1H.1.fid - 1H

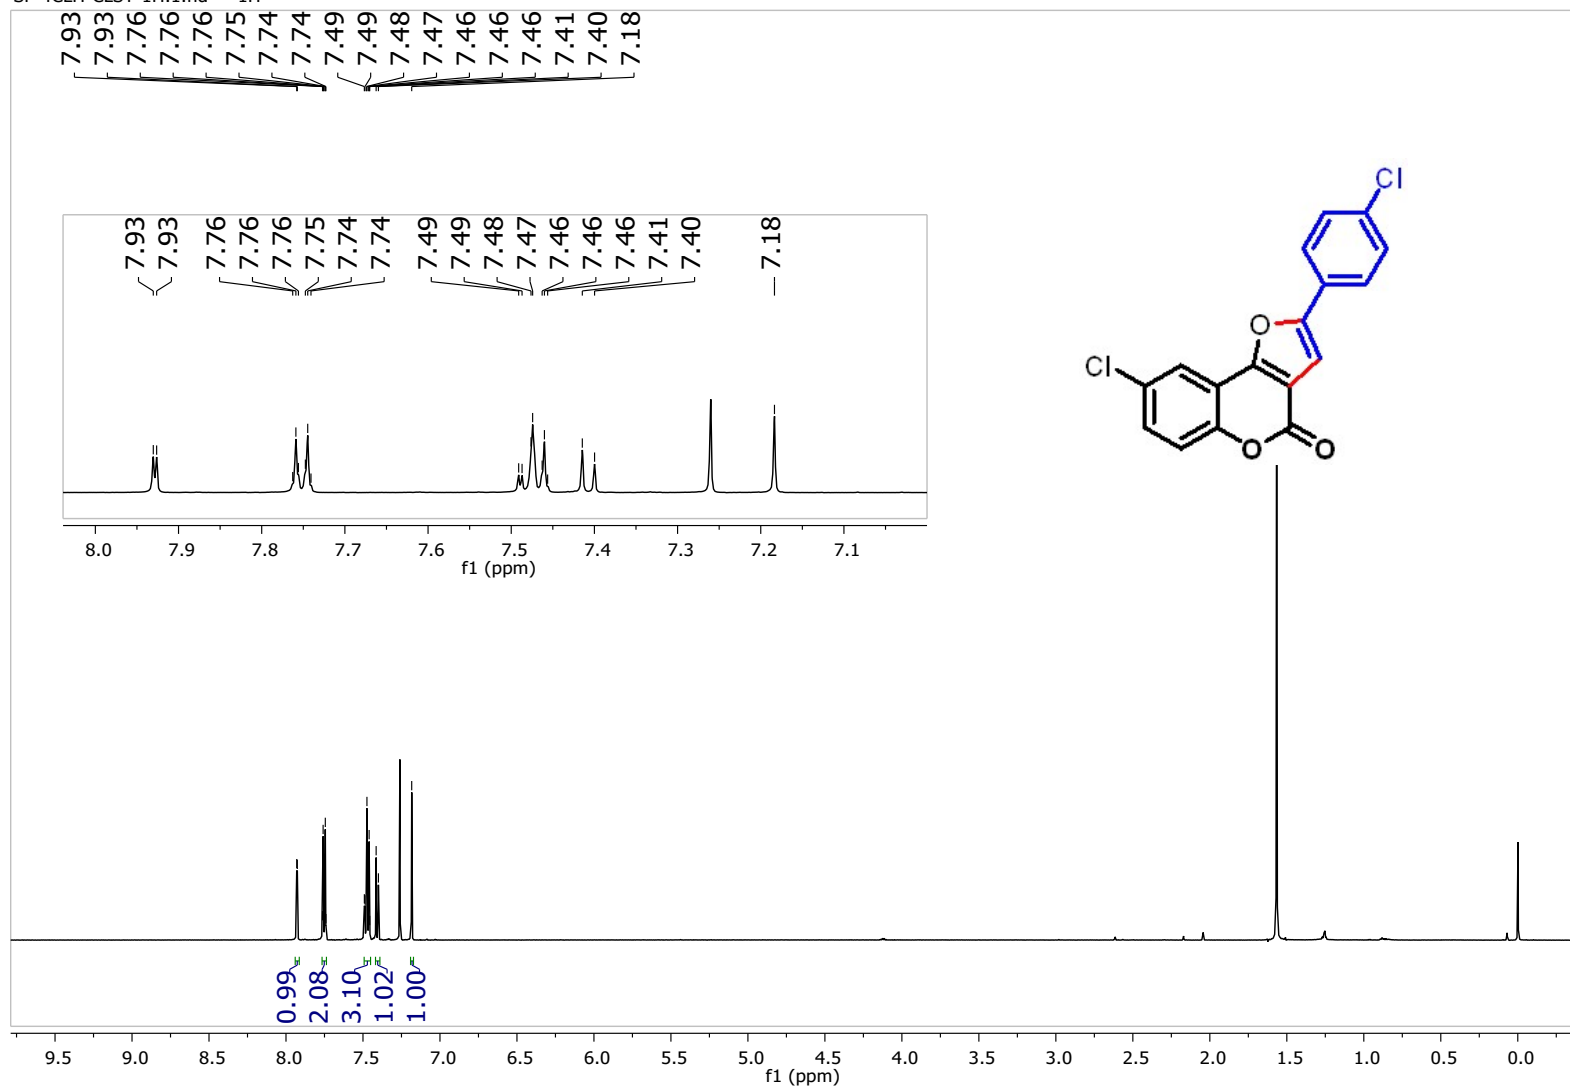

**<sup>13</sup>C NMR Spectrum of 8-Chloro-2-(4-chlorophenyl)-4H-furo[3,2-c]chromen-4-one (3r)**

SF-4CLH-CLST-13C.3.fid — 13C

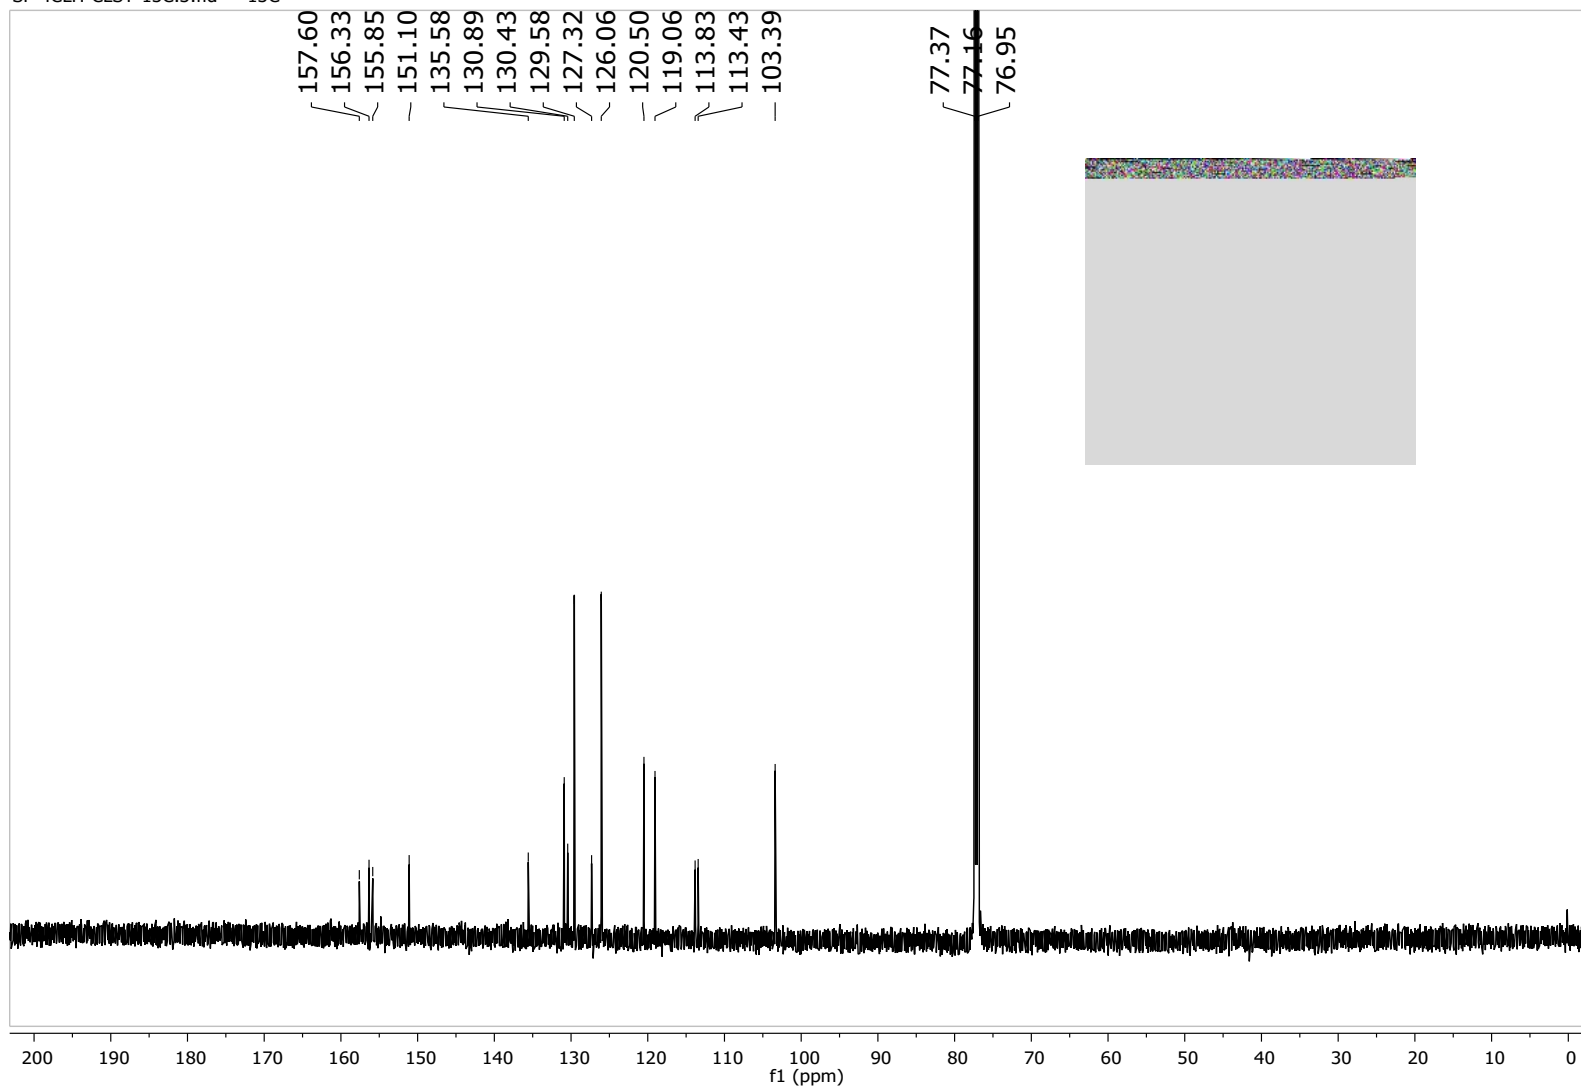

# HRMS Spectrum of 8-Chloro-2-(4-chlorophenyl)-4H-furo[3,2-c]chromen-4-one (3r)

|                    |                      |                               |         |                        |                                 |
|--------------------|----------------------|-------------------------------|---------|------------------------|---------------------------------|
| <b>Sample Name</b> | SF-PA-46E            | <b>Position</b>               | P2-D5   | <b>Instrument Name</b> | Instrument 1                    |
| <b>User Name</b>   |                      | <b>Inj Vol</b>                | 10      | <b>InjPosition</b>     |                                 |
| <b>Sample Type</b> | Sample               | <b>IRM Calibration Status</b> | Success | <b>Data Filename</b>   | SF-PA-46E_014.d                 |
| <b>ACQ Method</b>  | FULL SCAN-POSITIVE.m | <b>Comment</b>                |         | <b>Acquired Time</b>   | 30-04-2022 00:39:05 (UTC+05:30) |

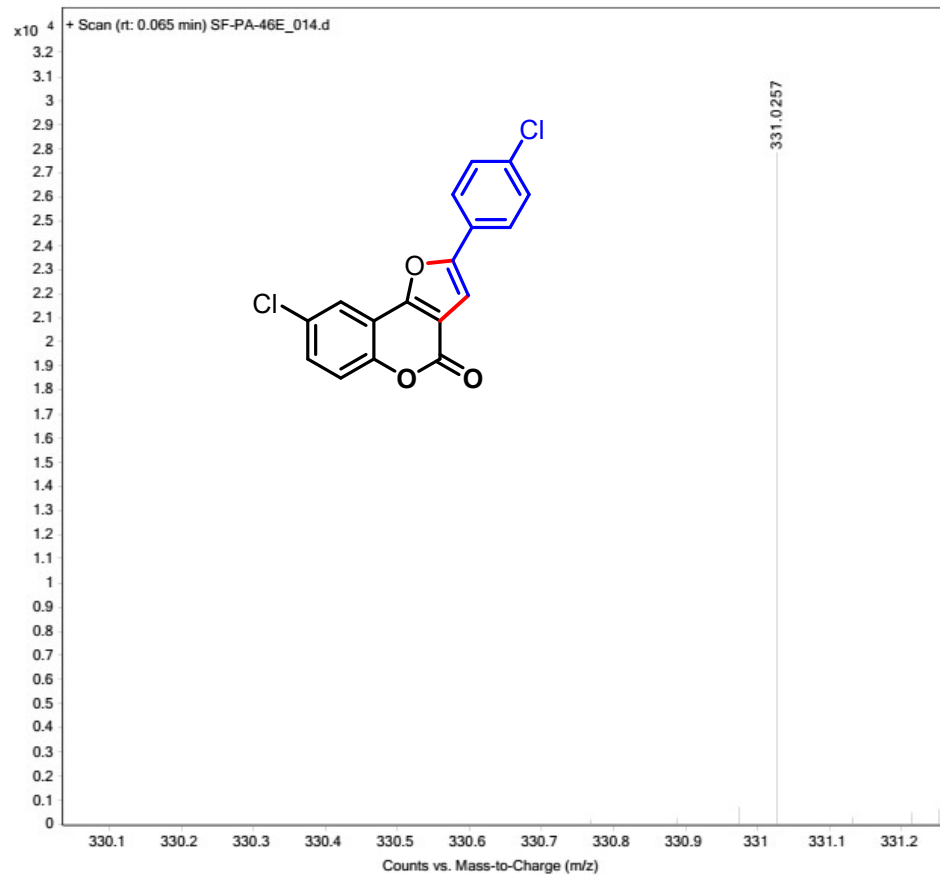

# <sup>1</sup>H NMR Spectrum of 8-Chloro-2-(*p*-tolyl)-4*H*-furo[3,2-*c*]chromen-4-one (3s)

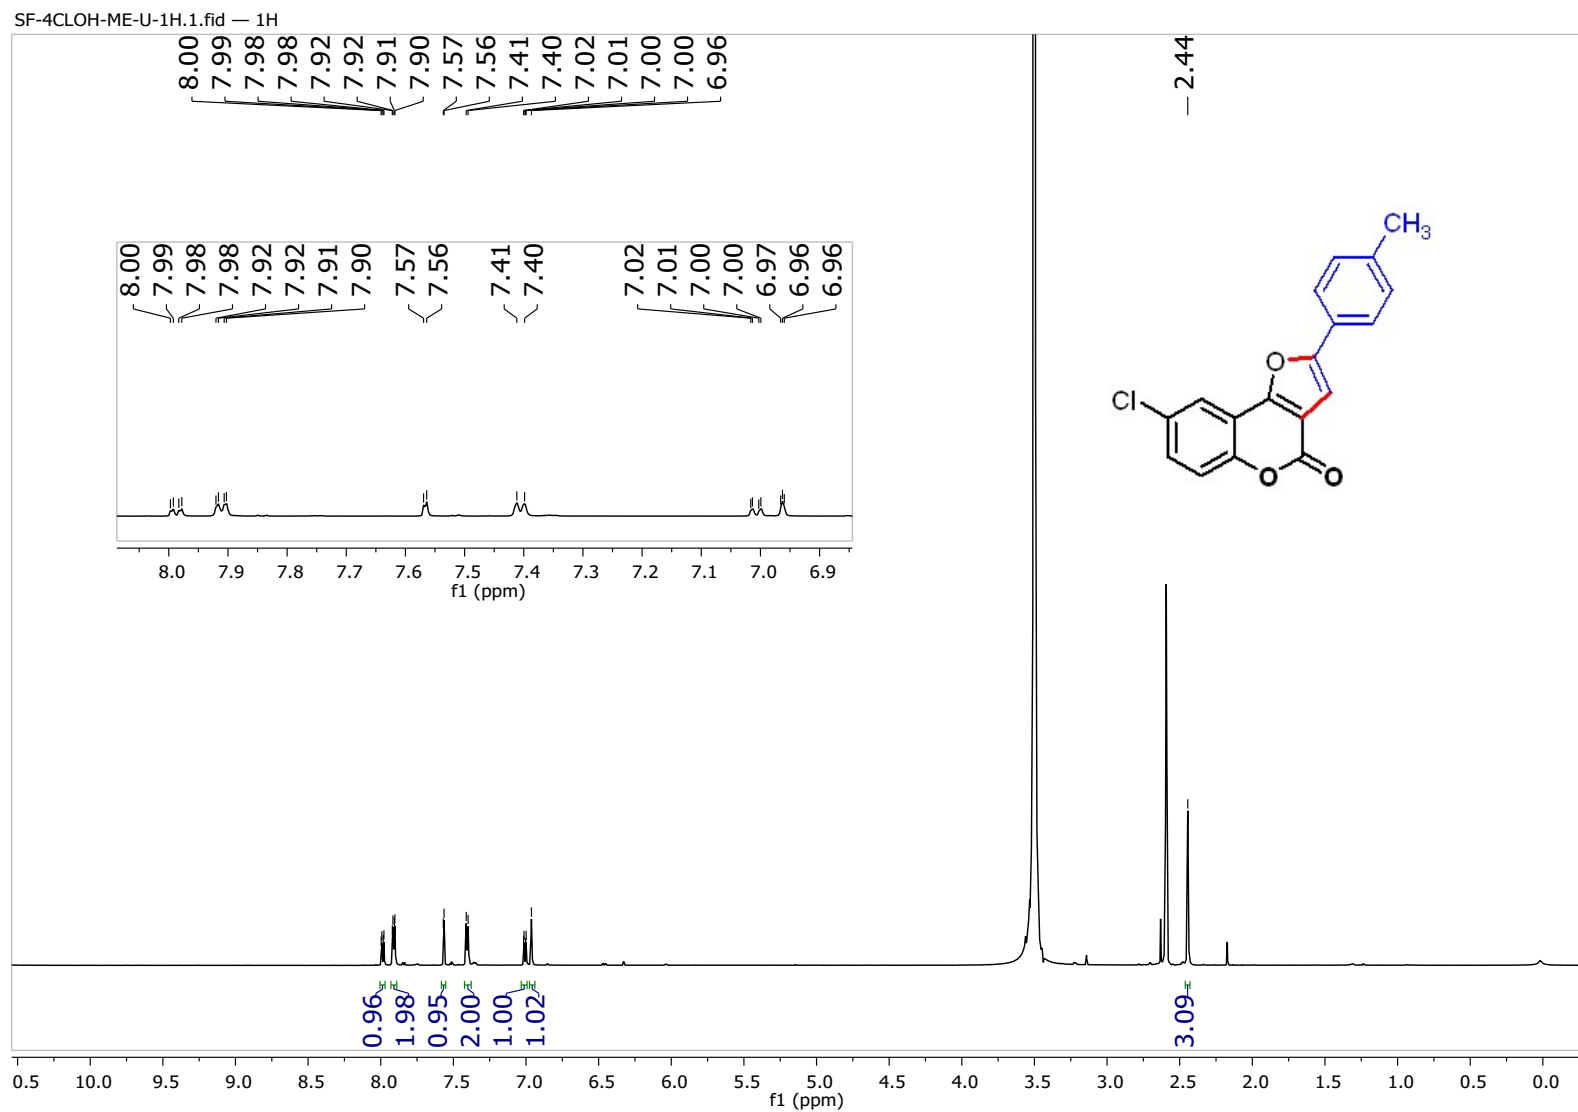

# <sup>13</sup>C NMR Spectrum of 8-Chloro-2-(*p*-tolyl)-4*H*-furo[3,2-*c*]chromen-4-one (3s)

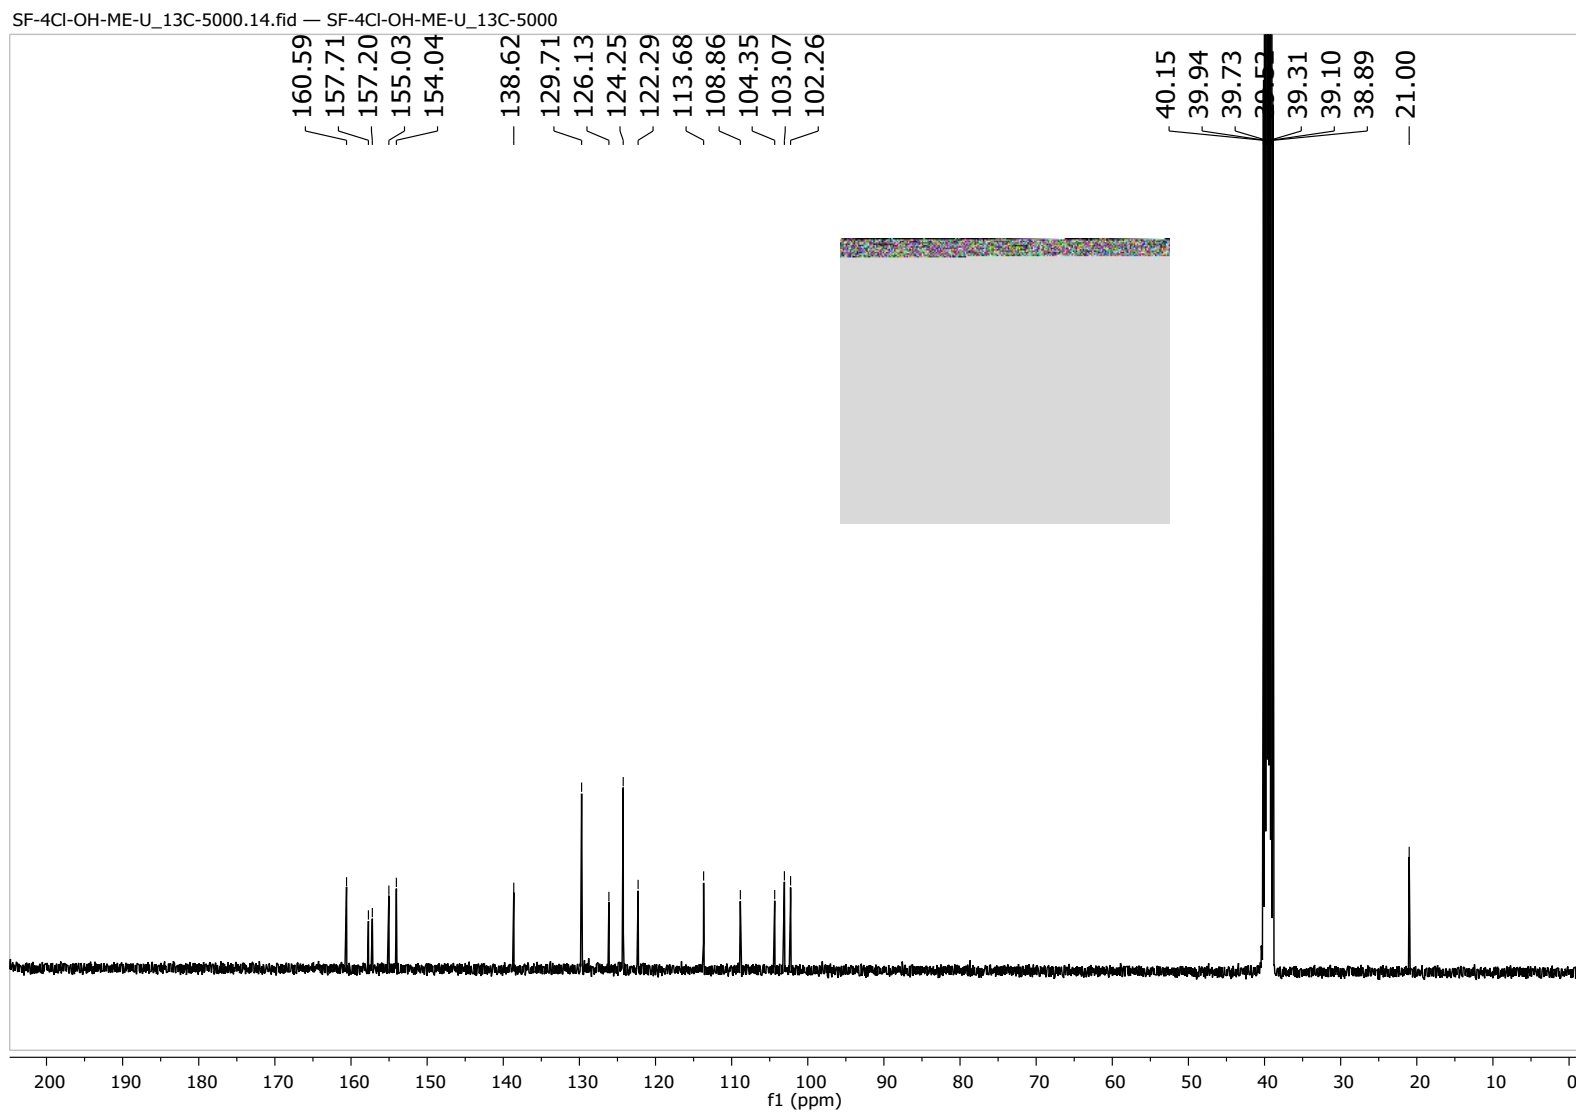

## HRMS Spectrum of 8-Chloro-2-(*p*-tolyl)-4*H*-furo[3,2-*c*]chromen-4-one (3s)

|             |                             |                        |         |                 |                                 |
|-------------|-----------------------------|------------------------|---------|-----------------|---------------------------------|
| Sample Name | Sample22                    | Position               | P1-B11  | Instrument Name | QTOF                            |
| User Name   | SYSTEM (SYSTEM)             | Inj Vol                | 5       | InjPosition     |                                 |
| Sample Type | Sample                      | IRM Calibration Status | Success | Data Filename   | SF_RJ_892.d                     |
| ACQ Method  | DIRECT MASS_POSITIVE_01_1.m | Comment                |         | Acquired Time   | 19-10-2023 10:58:11 (UTC+05:30) |

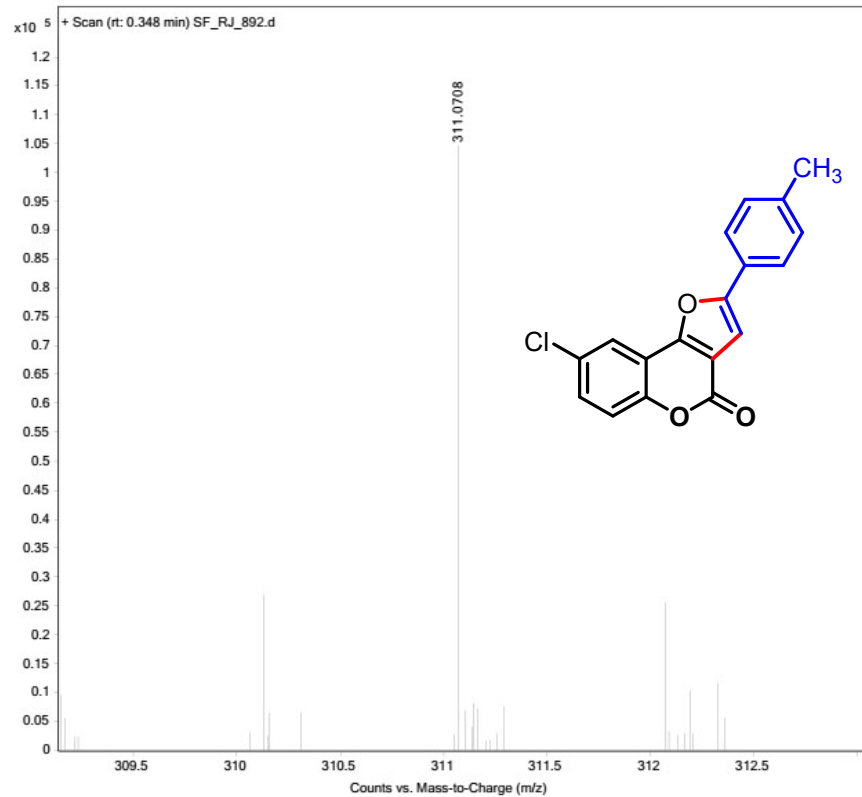

# <sup>1</sup>H NMR Spectrum of 8-Chloro-2-(*m*-tolyl)-4*H*-furo[3,2-*c*]chromen-4-one (3t)

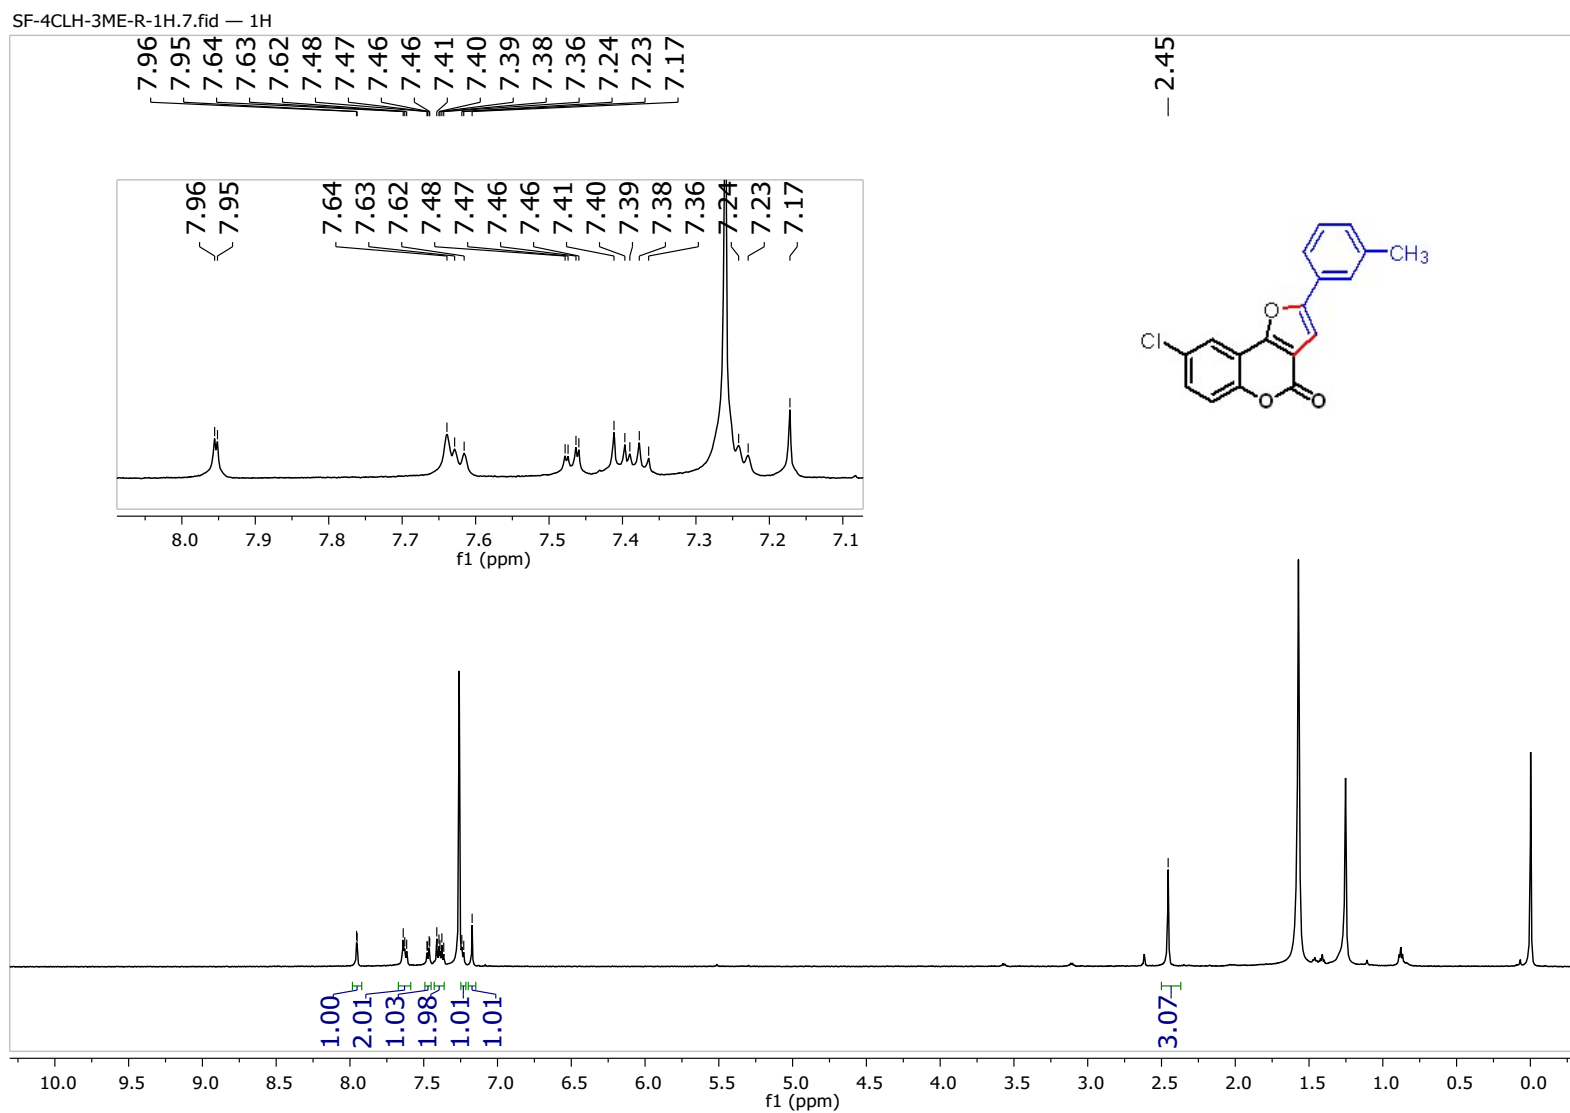



# <sup>13</sup>C NMR Spectrum of 8-Chloro-2-(*m*-tolyl)-4*H*-furo[3,2-*c*]chromen-4-one (3t)

SF-4CLH-3ME-R-13C.6.fid - 13C

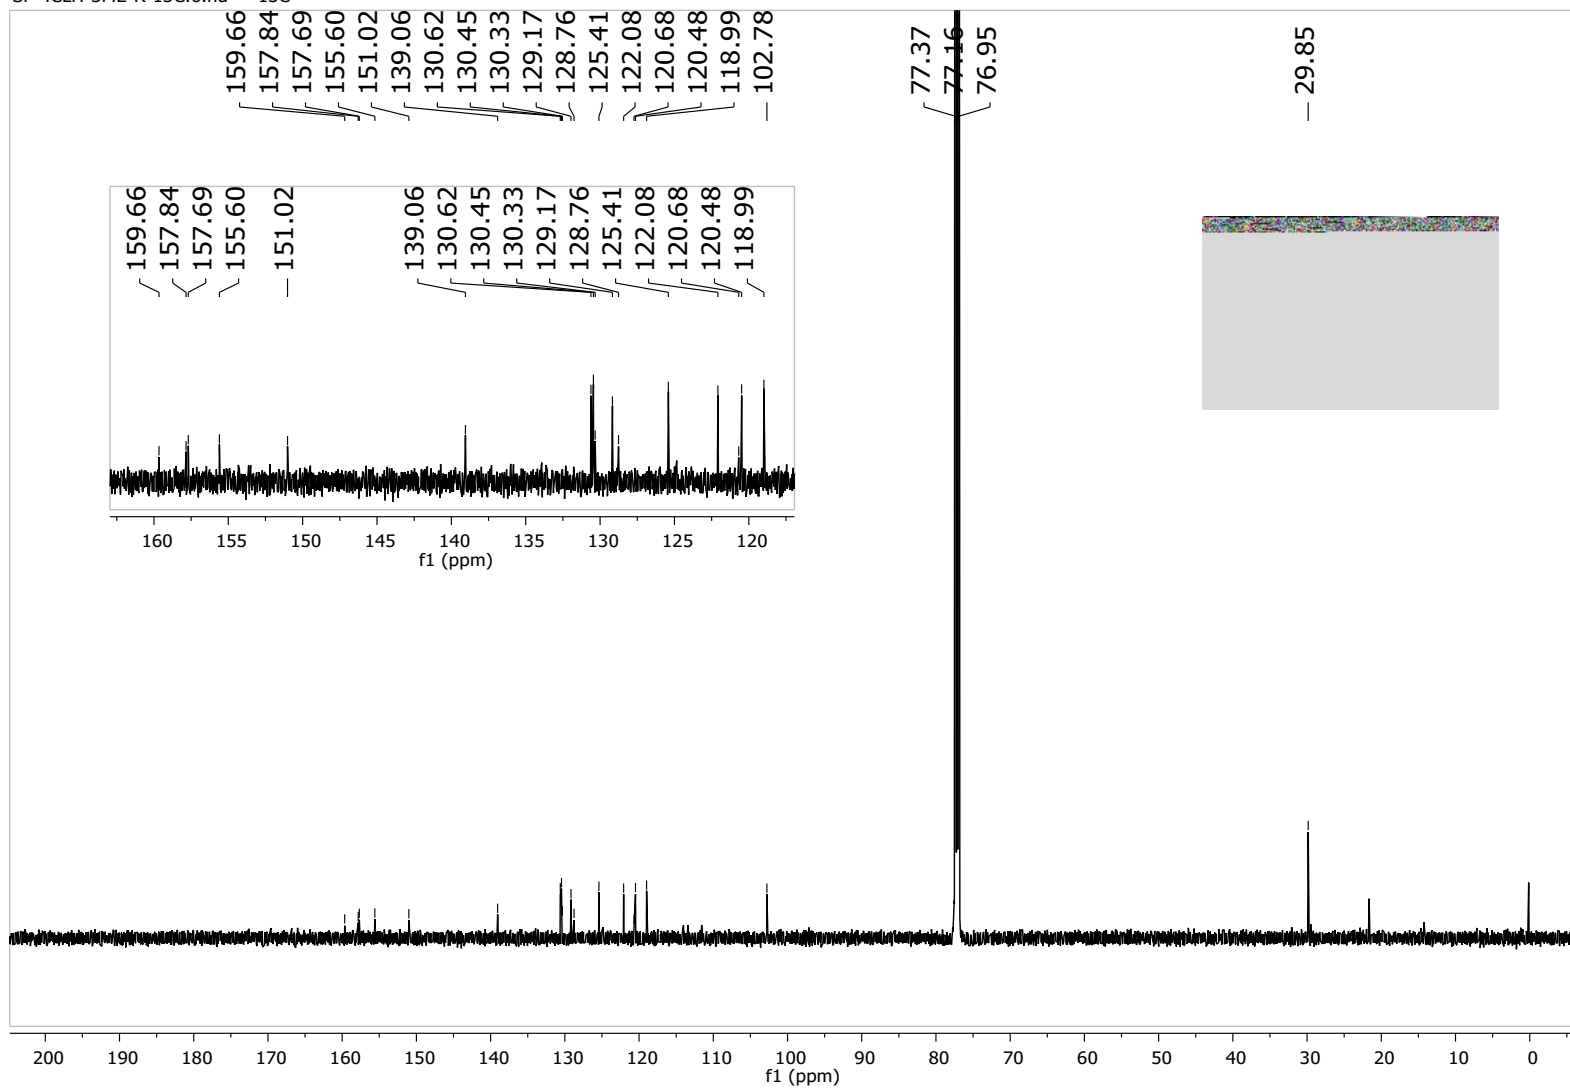

## HRMS Spectrum of 8-Chloro-2-(*m*-tolyl)-4*H*-furo[3,2-*c*]chromen-4-one (3t)

|             |                      |                        |         |                 |                                 |
|-------------|----------------------|------------------------|---------|-----------------|---------------------------------|
| Sample Name | SF-PA-3BR-E3         | Position               | P2-C9   | Instrument Name | Instrument 1                    |
| User Name   |                      | Inj Vol                | 10      | InjPosition     |                                 |
| Sample Type | Sample               | IRM Calibration Status | Success | Data Filename   | SF-PA-3BR-E3_009.d              |
| ACQ Method  | FULL SCAN-POSITIVE.m | Comment                |         | Acquired Time   | 30-04-2022 00:29:51 (UTC+05:30) |

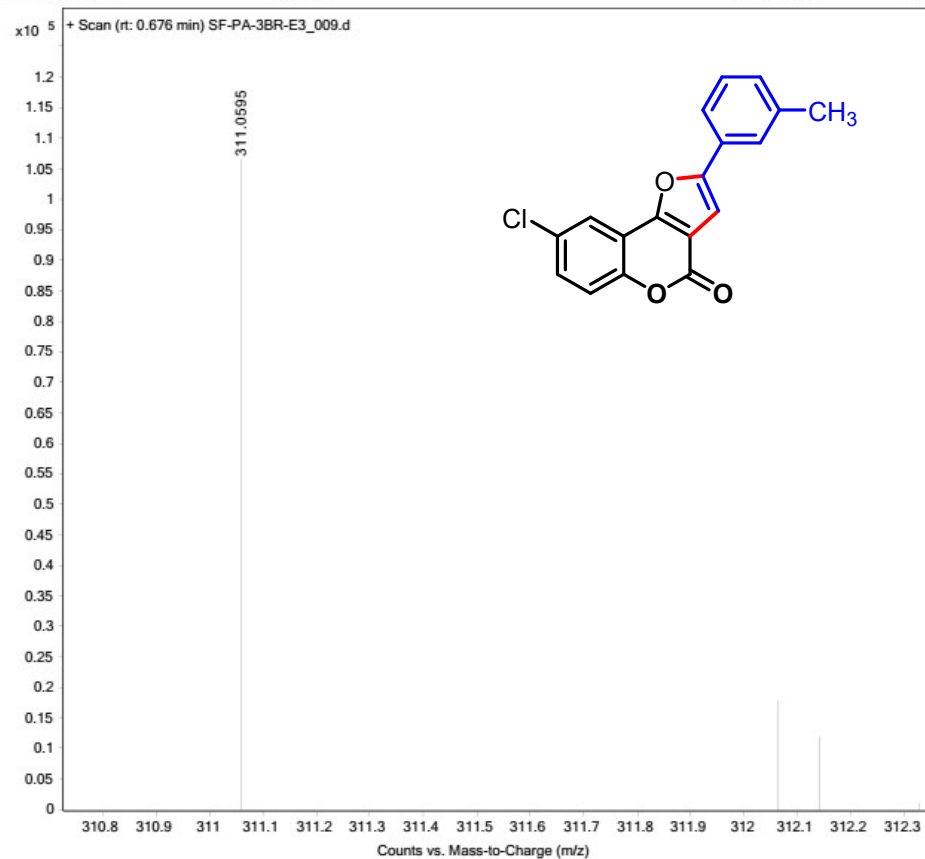

### <sup>1</sup>H NMR Spectrum of 8-Fluoro-2-phenyl-4*H*-furo[3,2-*c*]chromen-4-one (3u)

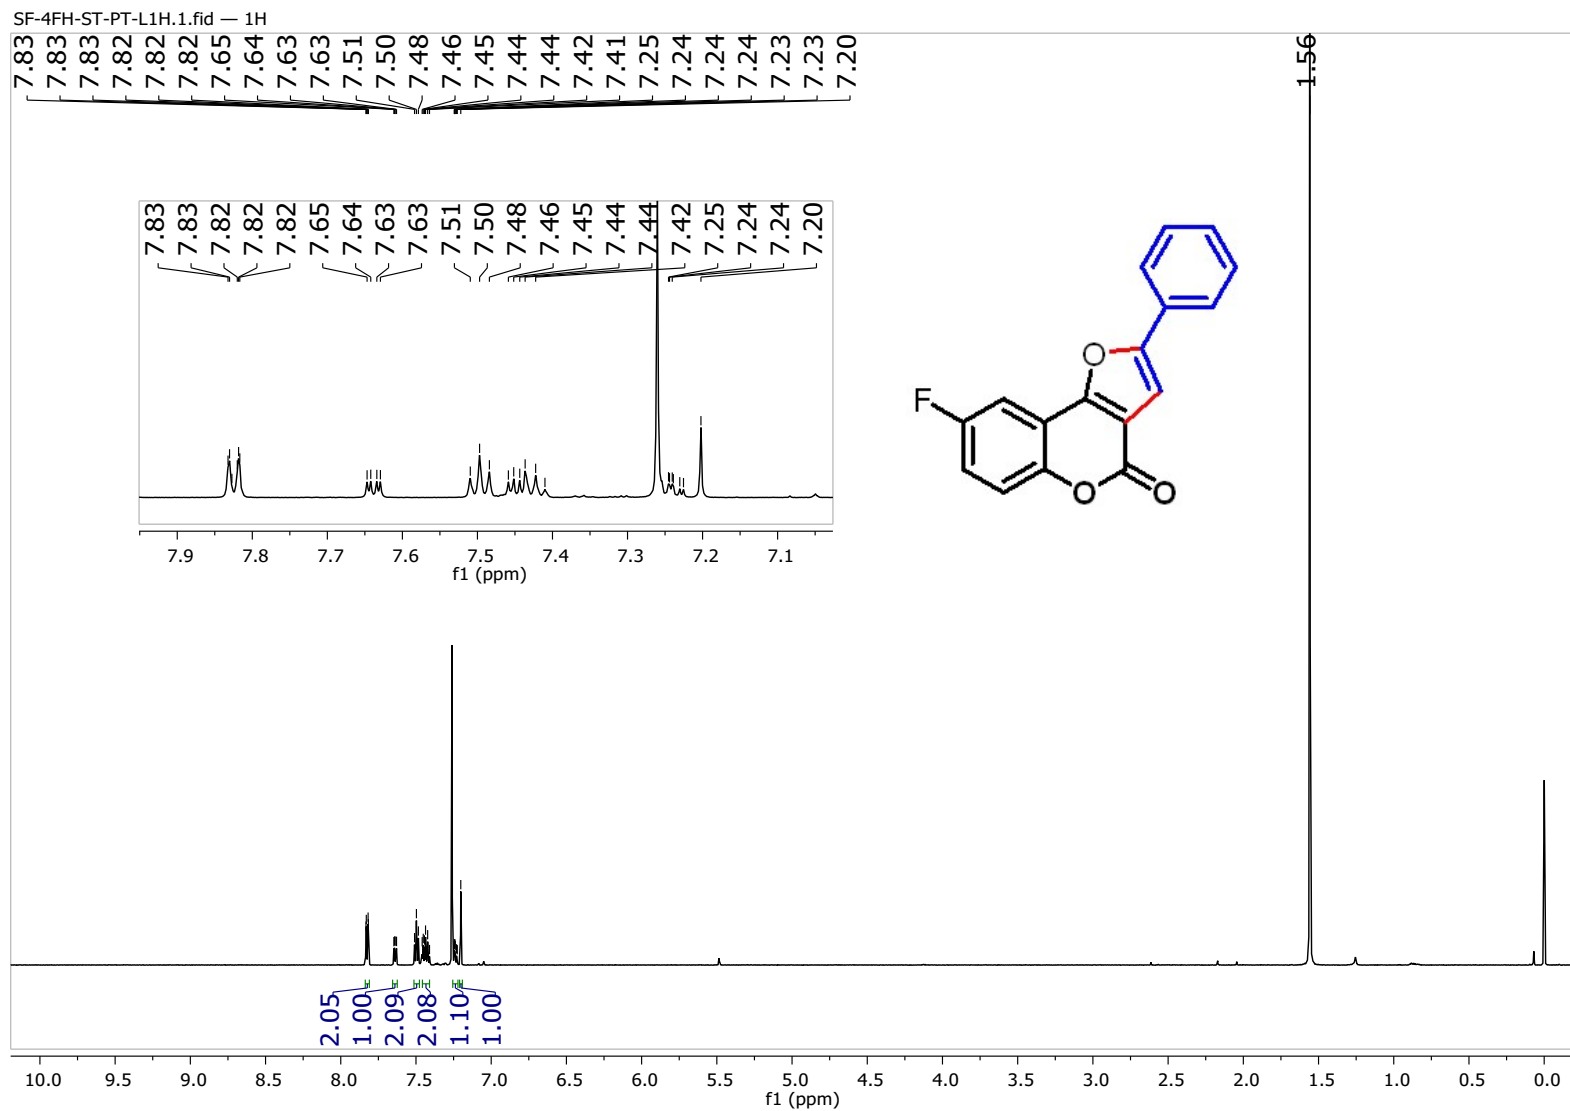

# <sup>13</sup>C NMR Spectrum of 8-Fluoro-2-phenyl-4H-furo[3,2-c]chromen-4-one (3u)

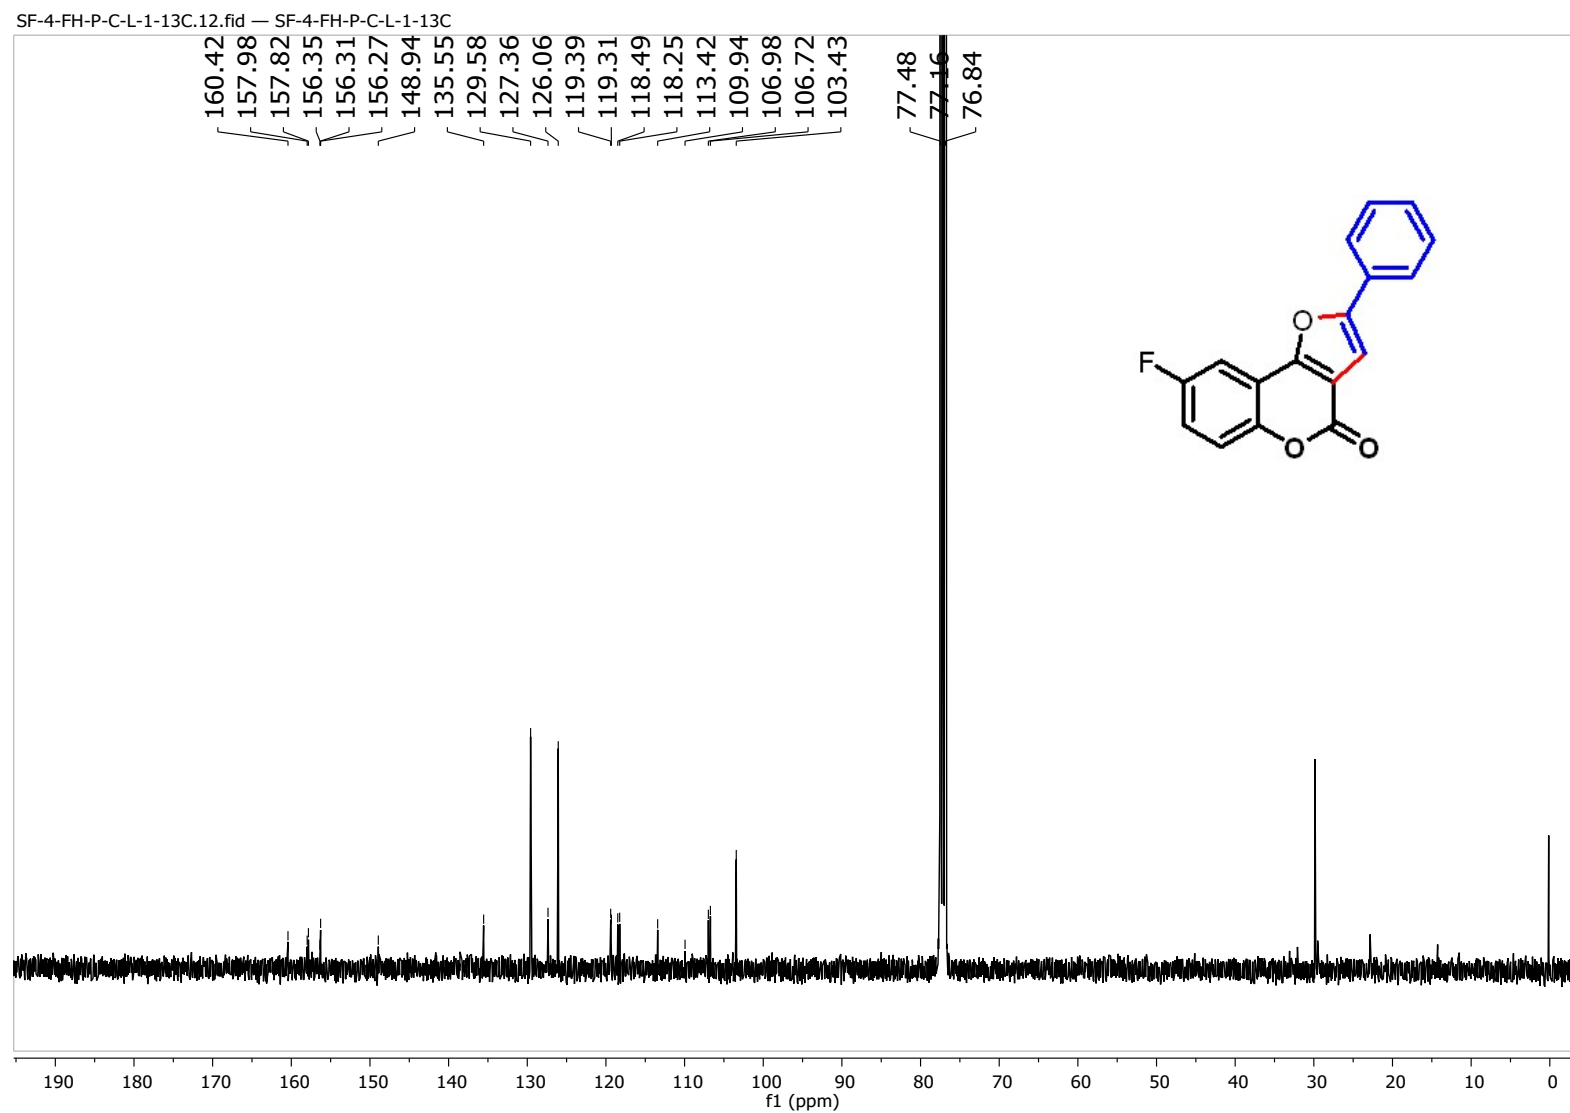

**<sup>19</sup>F NMR Spectrum of 8-Fluoro-2-phenyl-4*H*-furo[3,2-*c*]chromen-4-one (3u)**

SF-4FH-ST-PT-L-19F.1.fid — SF-4FH-ST-PT-L-19F

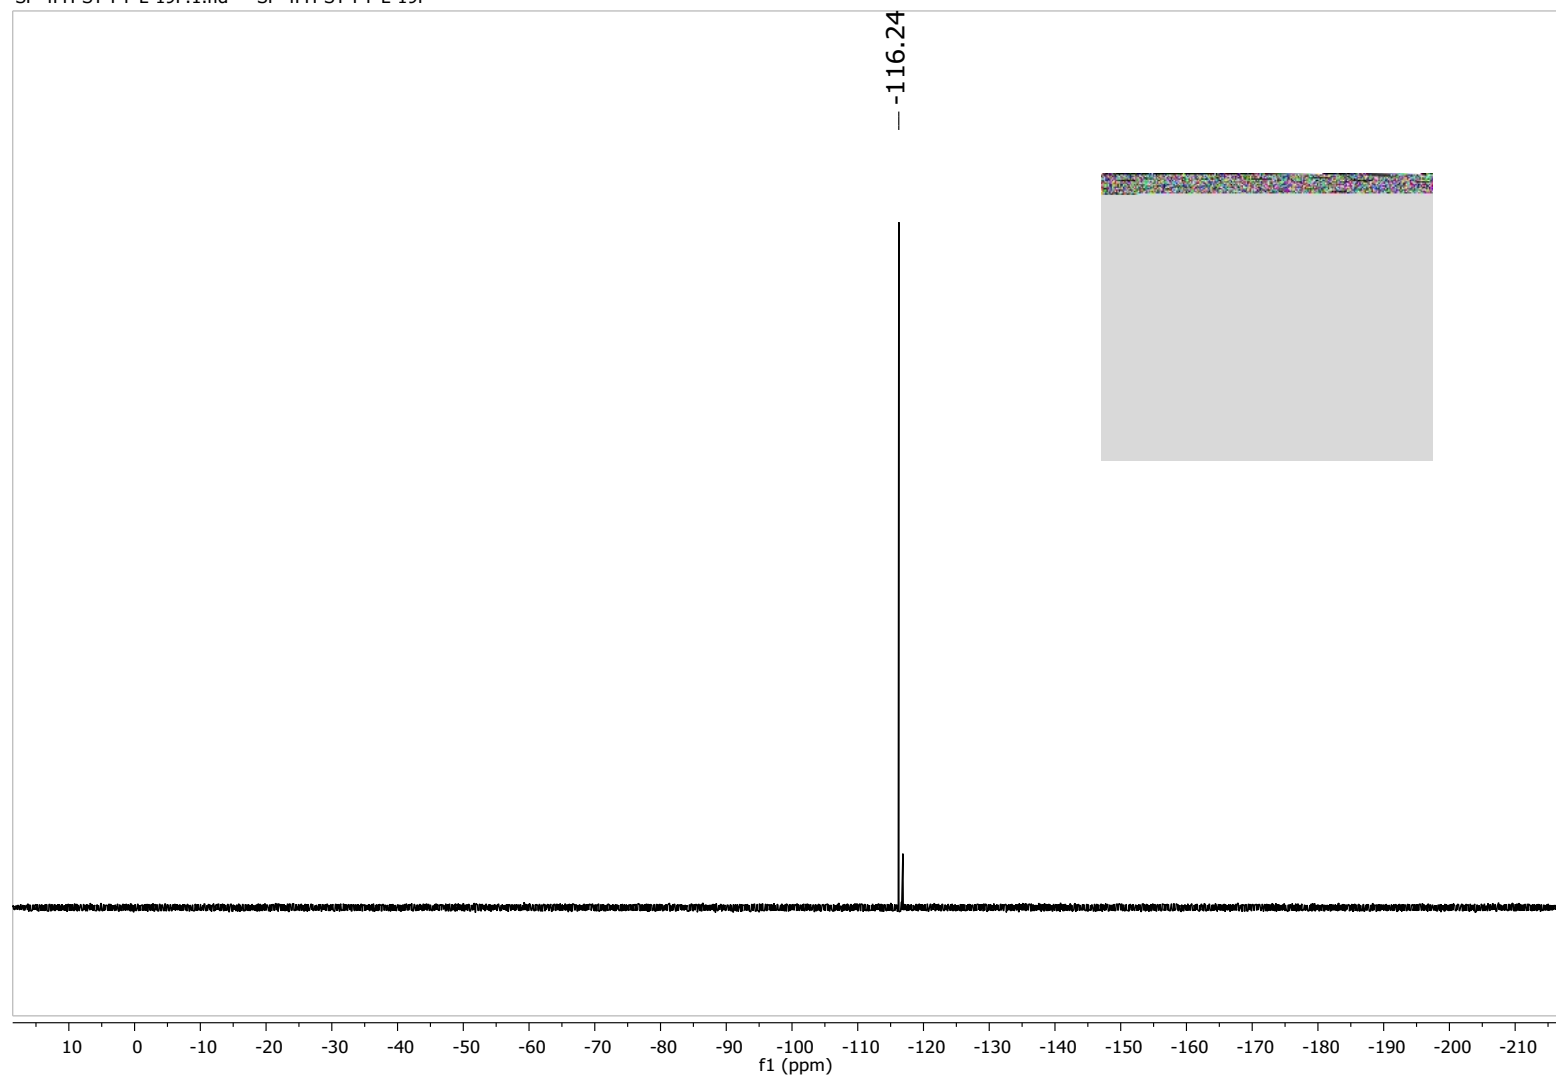

## HRMS Spectrum of 8-Fluoro-2-phenyl-4*H*-furo[3,2-*c*]chromen-4-one (3u)

|                    |                      |                               |         |                        |                                 |
|--------------------|----------------------|-------------------------------|---------|------------------------|---------------------------------|
| <b>Sample Name</b> | SF-PA-12A DOC        | <b>Position</b>               | P2-D6   | <b>Instrument Name</b> | Instrument 1                    |
| <b>User Name</b>   |                      | <b>Inj Vol</b>                | 10      | <b>InjPosition</b>     |                                 |
| <b>Sample Type</b> | Sample               | <b>IRM Calibration Status</b> | Success | <b>Data Filename</b>   | SF-PA-12A DOC_015.d             |
| <b>ACQ Method</b>  | FULL SCAN-POSITIVE.m | <b>Comment</b>                |         | <b>Acquired Time</b>   | 30-04-2022 00:40:58 (UTC+05:30) |

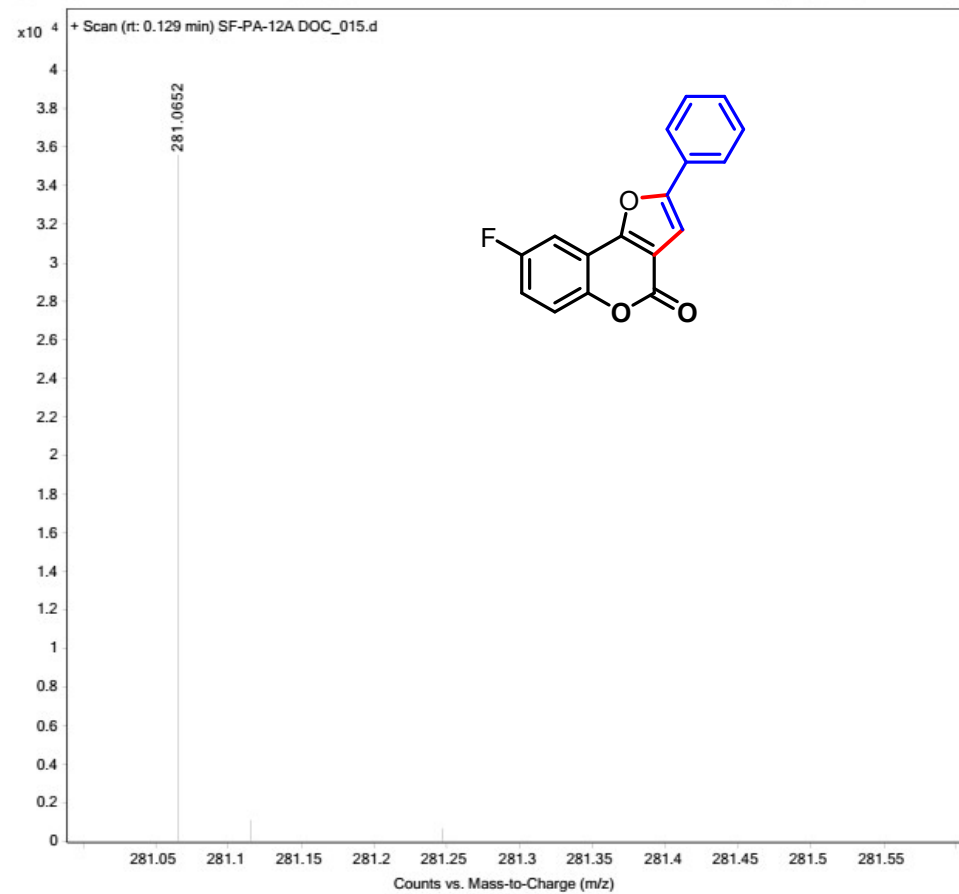

**<sup>1</sup>H NMR Spectrum of 2-(4-Chlorophenyl)-8-fluoro-4H-furo[3,2-c]chromen-4-one (3v)**

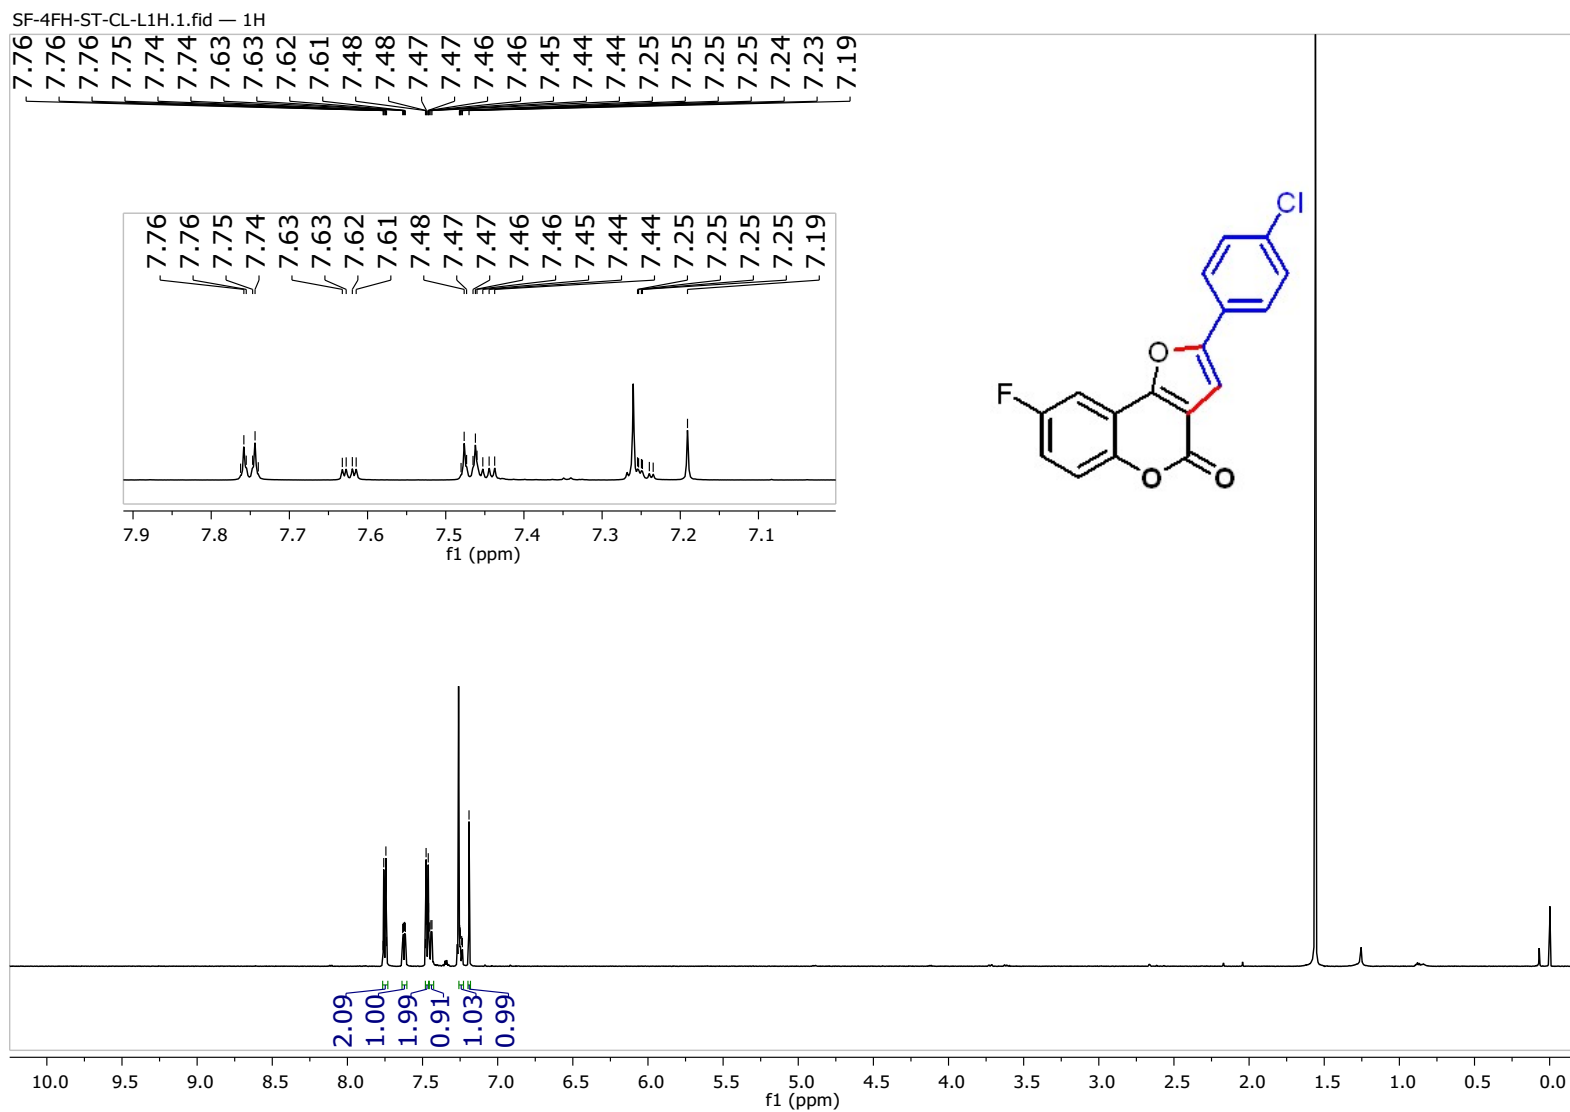

### <sup>13</sup>C NMR Spectrum of 2-(4-Chlorophenyl)-8-fluoro-4H-furo[3,2-c]chromen-4-one (3v)

SF-4FH-CLST-13C - Copy.4.fid — 13C

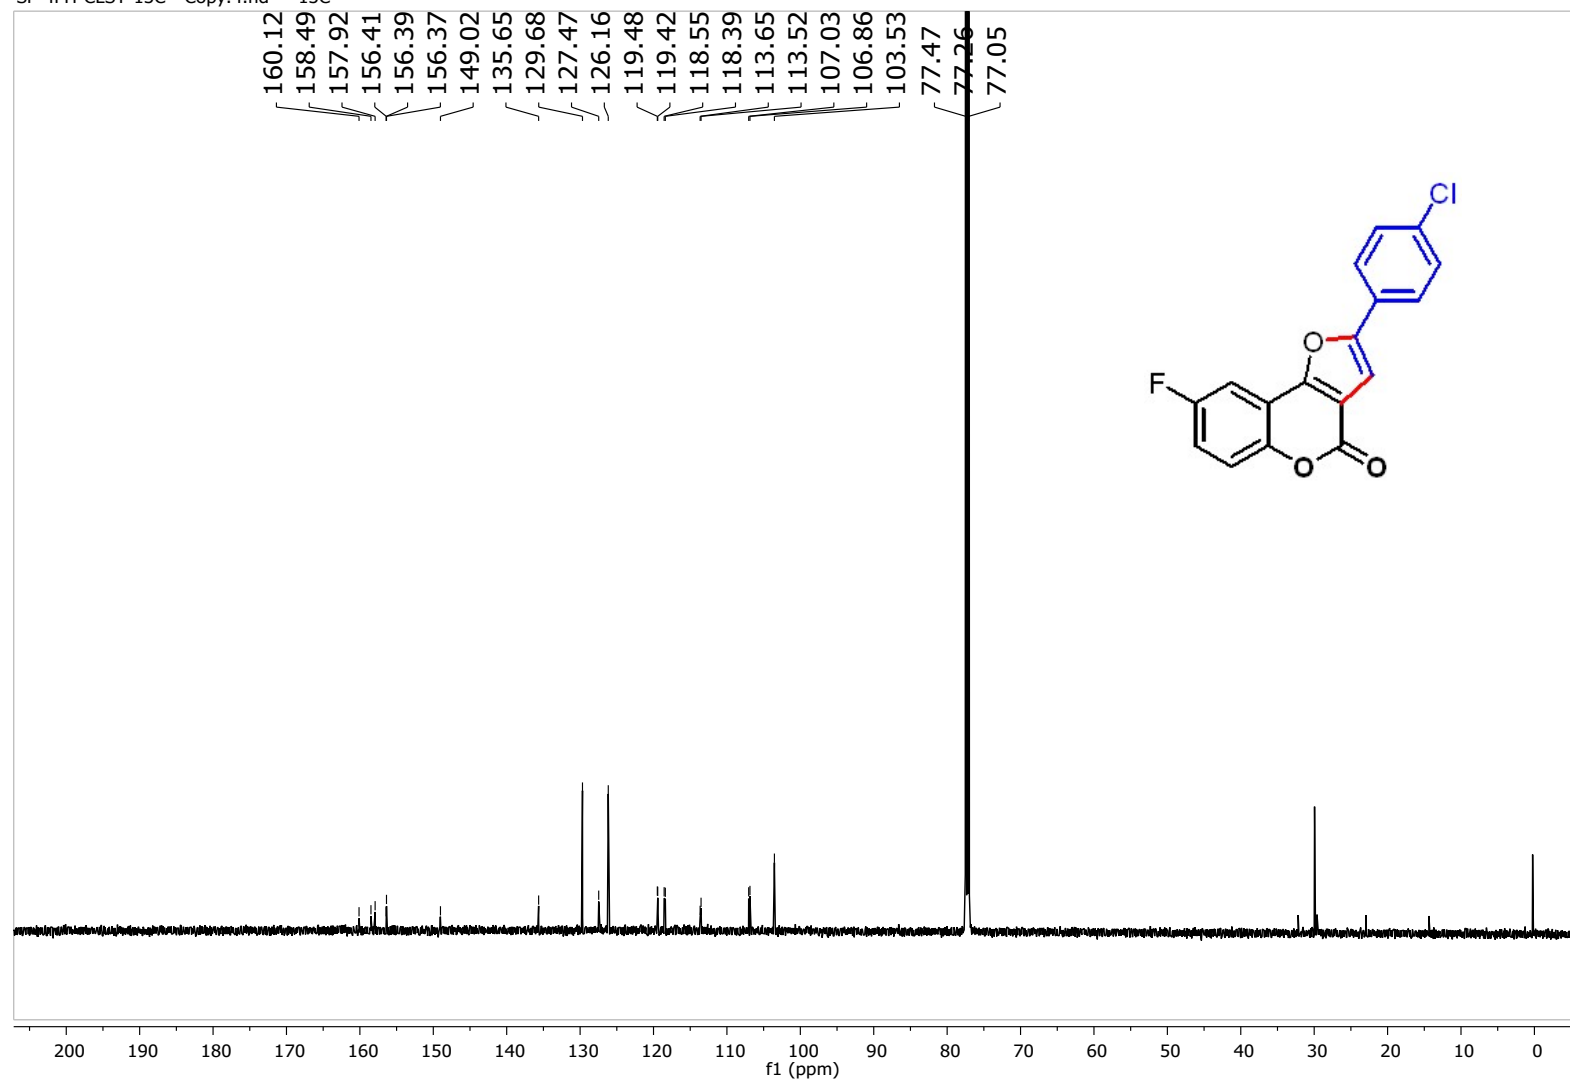



**<sup>19</sup>F NMR Spectrum of 2-(4-Chlorophenyl)-8-fluoro-4*H*-furo[3,2-*c*]chromen-4-one (3v)**

SF-4FH-ST4-19F.1.fid — SF-4FH-ST4-19F

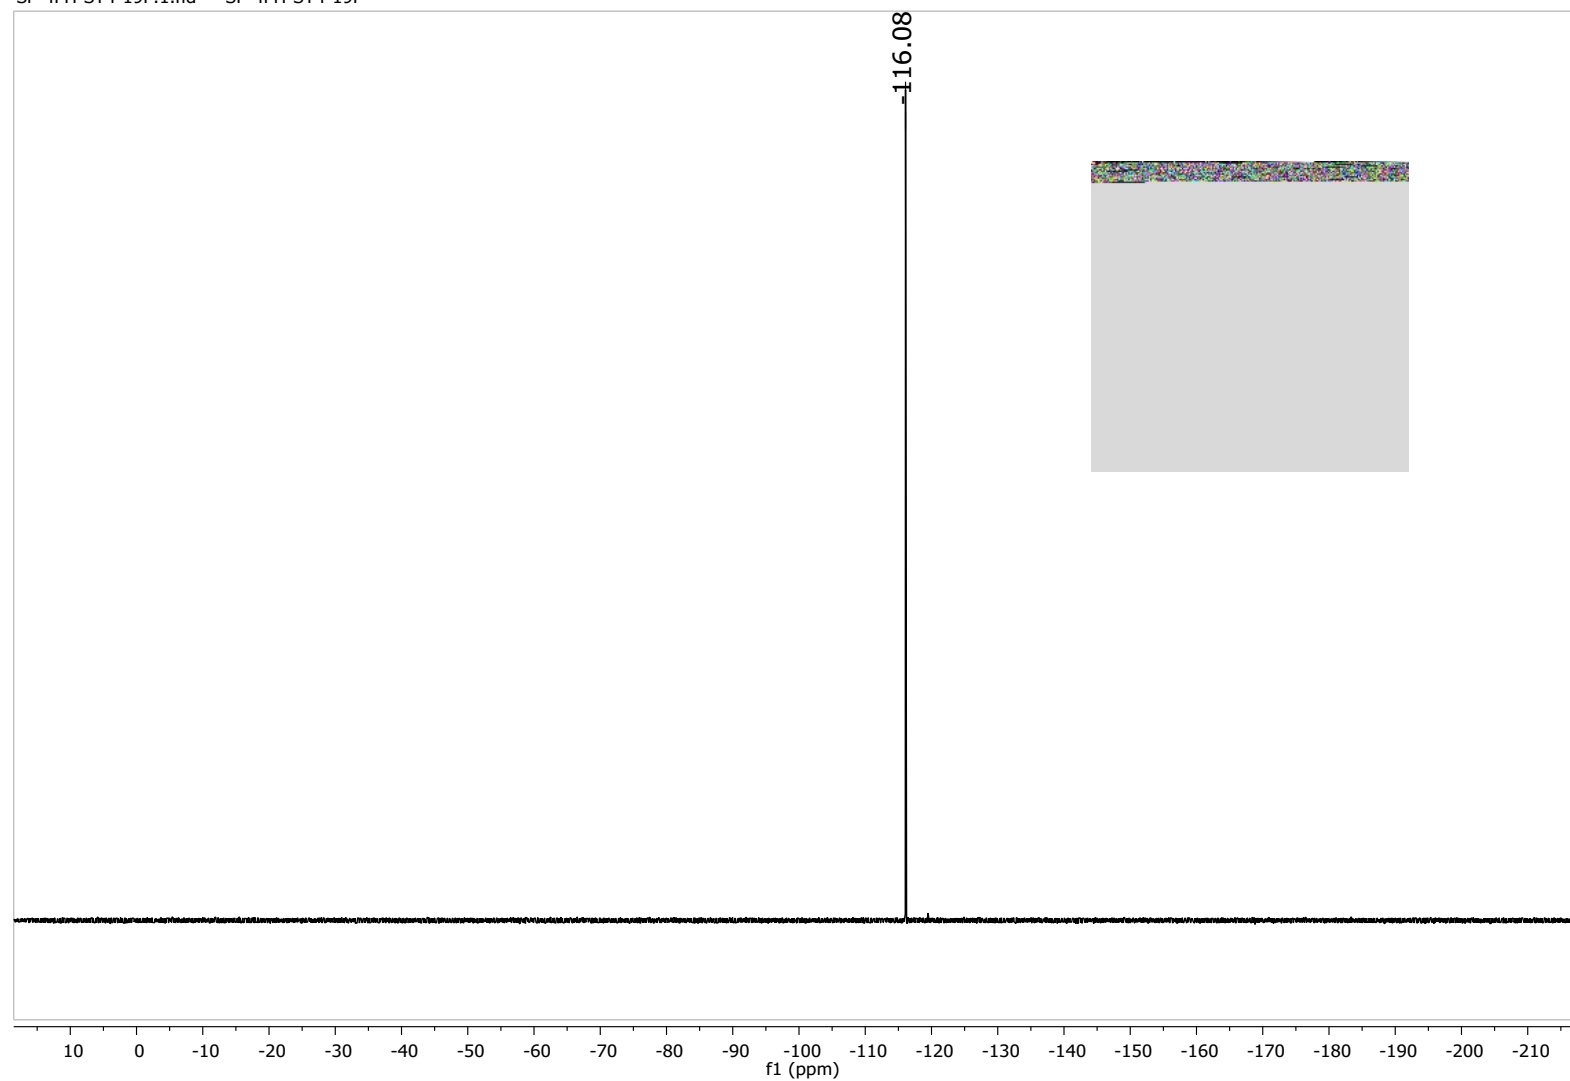

# HRMS Spectrum of 2-(4-Chlorophenyl)-8-fluoro-4H-furo[3,2-c]chromen-4-one (3v)

|             |                           |                        |         |                 |                                 |
|-------------|---------------------------|------------------------|---------|-----------------|---------------------------------|
| Sample Name | Sample1                   | Position               | P1-A1   | Instrument Name | QTOF                            |
| User Name   | SYSTEM (SYSTEM)           | Inj Vol                | 5       | InjPosition     |                                 |
| Sample Type | Sample                    | IRM Calibration Status | Success | Data Filename   | SF24C11.d                       |
| ACQ Method  | DIRECT MASS_POSITIVE_01.m | Comment                |         | Acquired Time   | 18-04-2023 10:51:33 (UTC+05:30) |

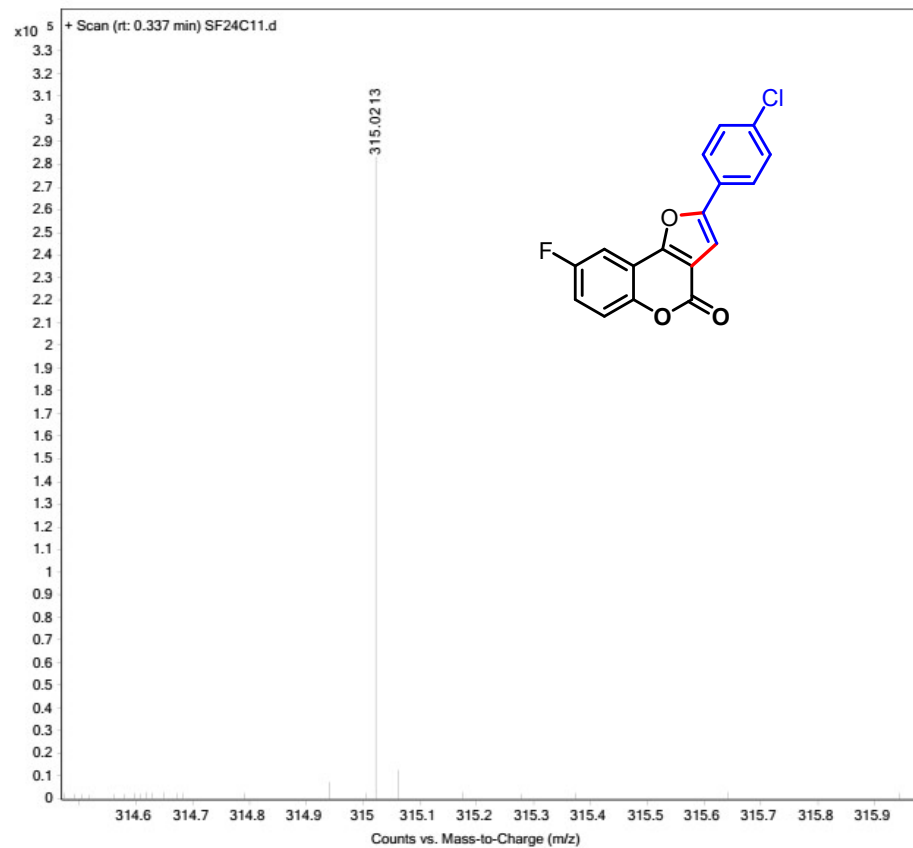

# <sup>1</sup>H NMR Spectrum of 8-Fluoro-2-(*p*-tolyl)-4*H*-furo[3,2-*c*]chromen-4-one (3w)

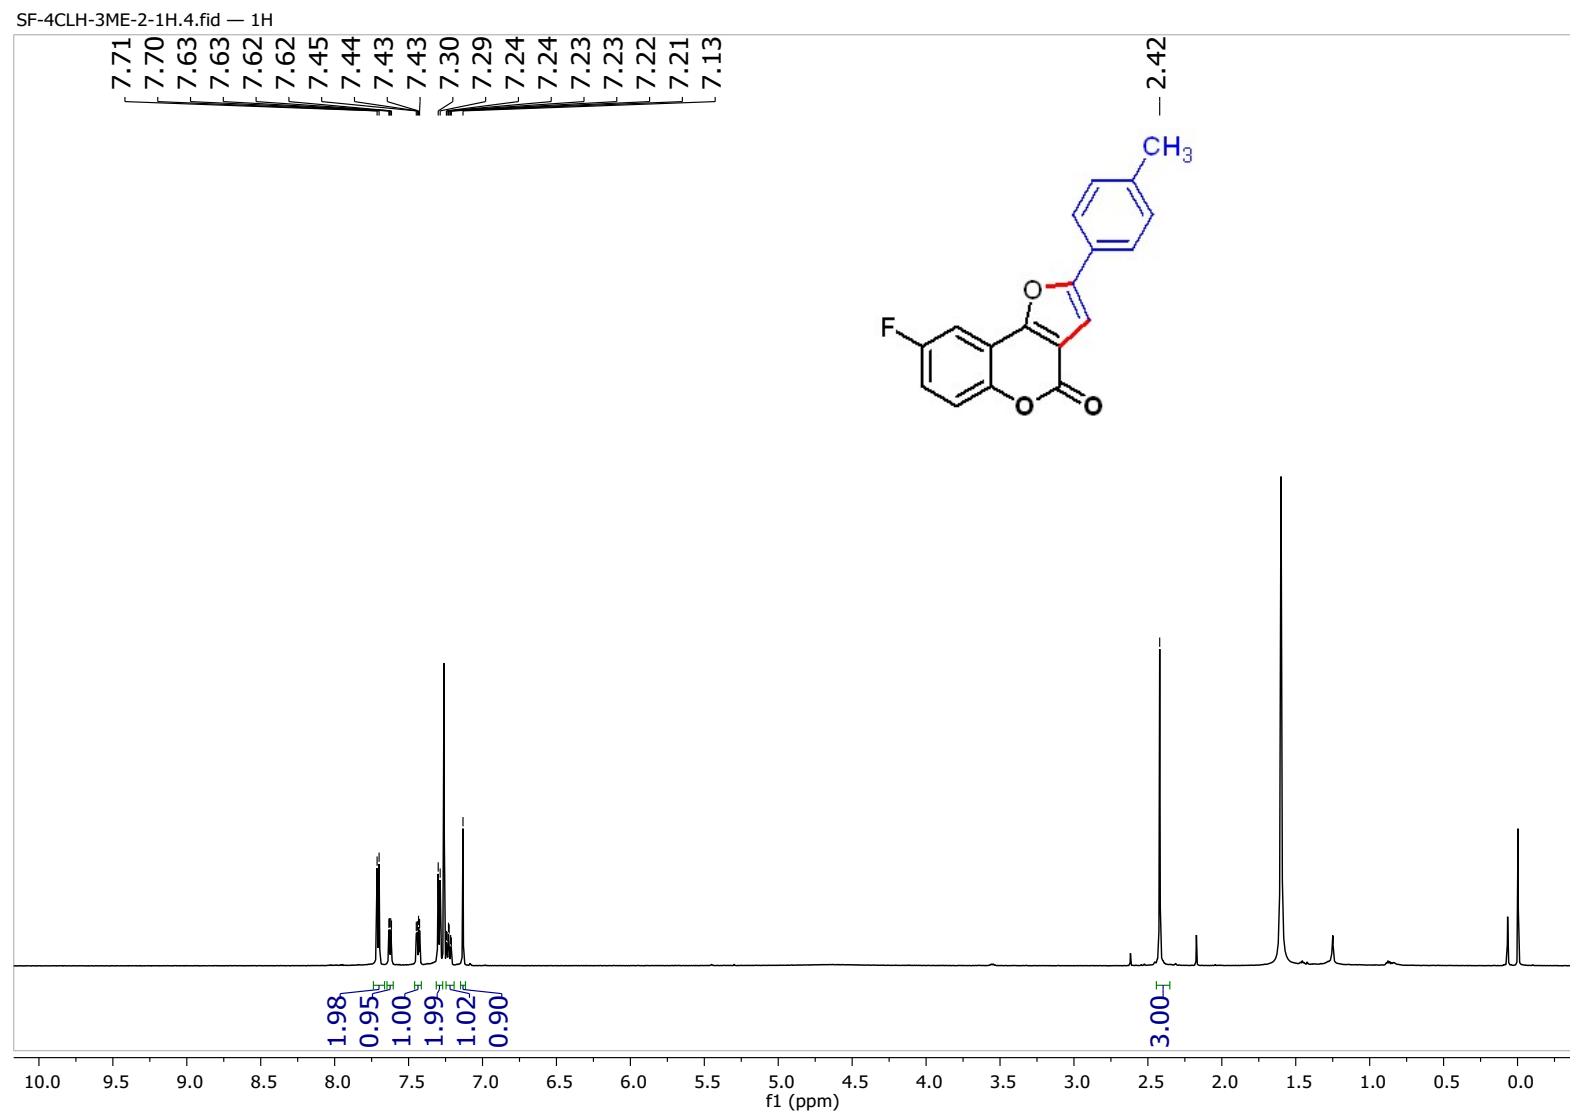

**<sup>13</sup>C NMR Spectrum of 8-Fluoro-2-(*p*-tolyl)-4*H*-furo[3,2-*c*]chromen-4-one (3w)**

SF-4CLH-3ME-2-13C.3.fid — 13C

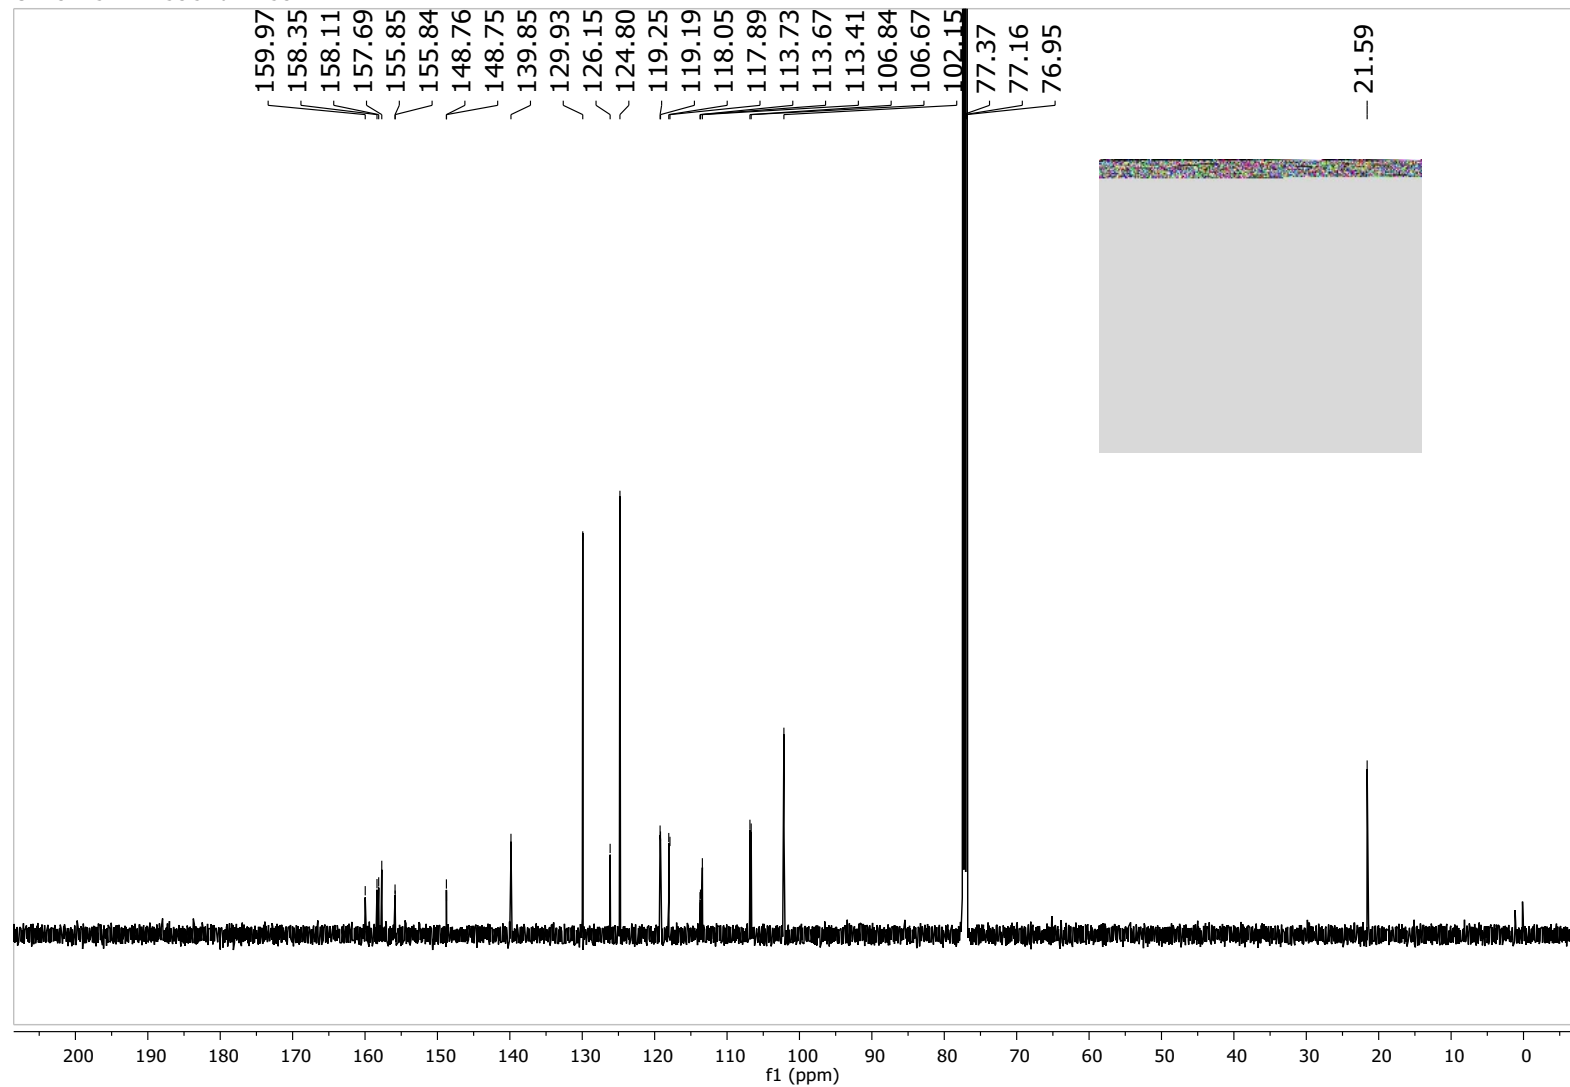

**<sup>19</sup>F NMR Spectrum of 8-Fluoro-2-(*p*-tolyl)-4*H*-furo[3,2-*c*]chromen-4-one (3w)**

SF-4CLH-3ME-2-19F.1.fid — 19F

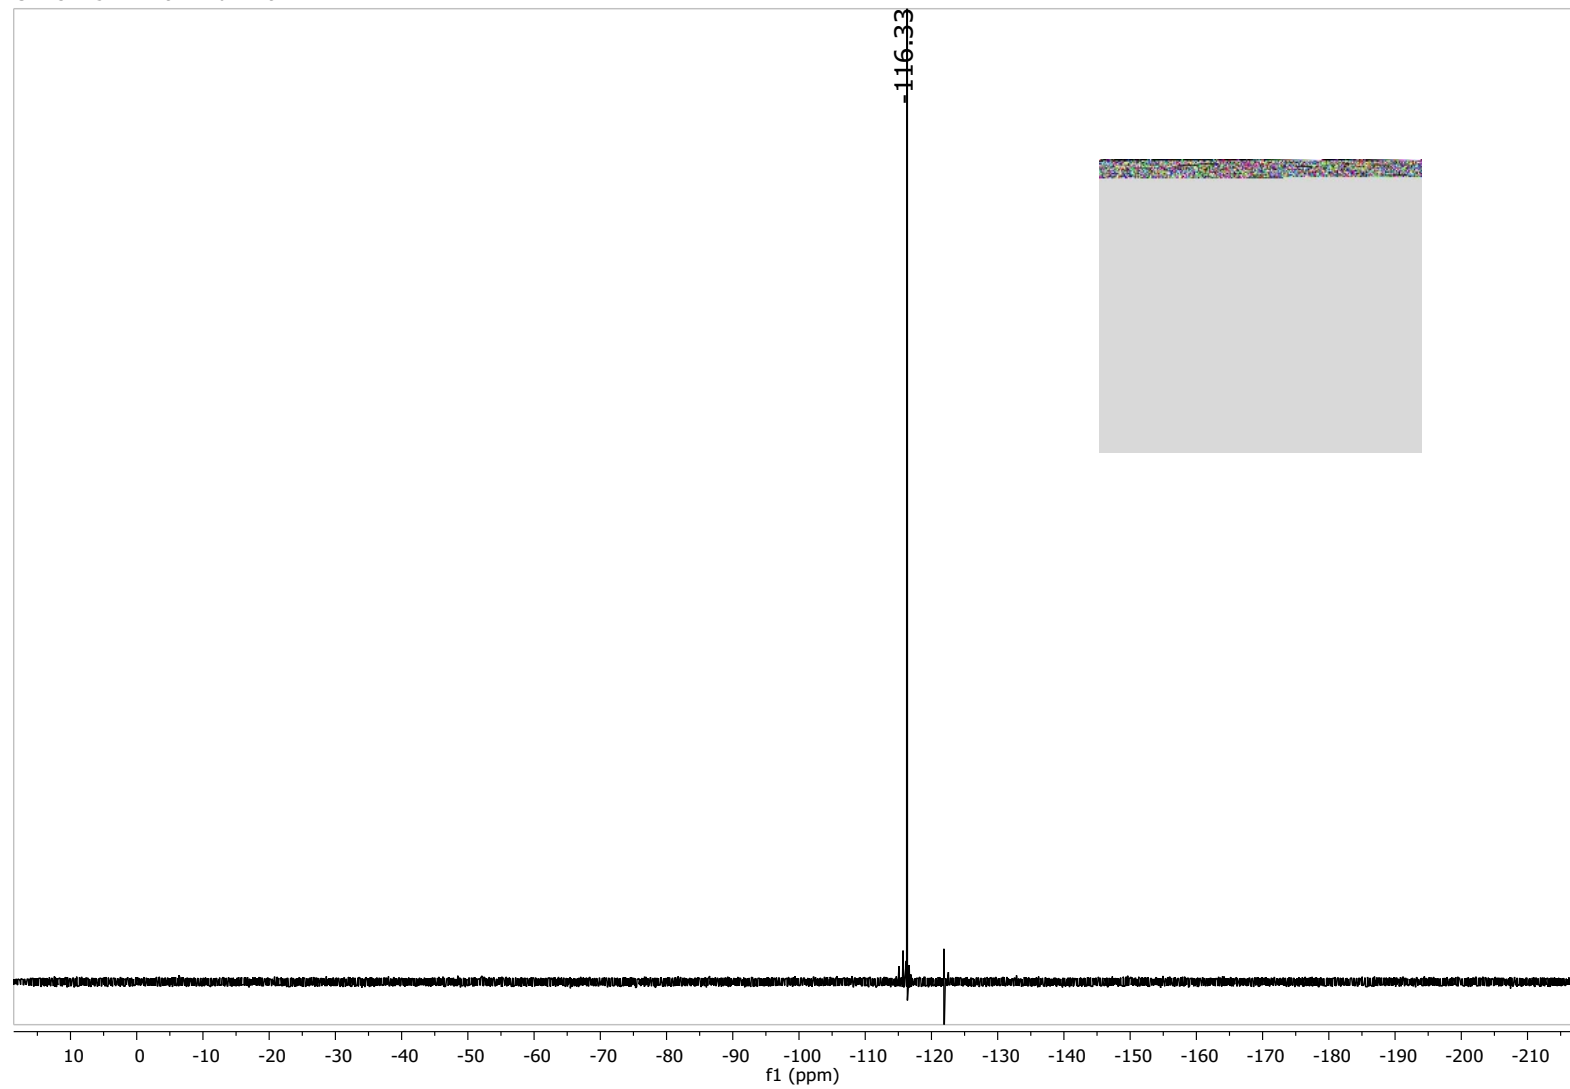

## HRMS Spectrum of 8-Fluoro-2-(*p*-tolyl)-4*H*-furo[3,2-*c*]chromen-4-one (3w)

|                    |                                 |                               |         |                        |                                 |
|--------------------|---------------------------------|-------------------------------|---------|------------------------|---------------------------------|
| <b>Sample Name</b> | Sample11                        | <b>Position</b>               | P1-A10  | <b>Instrument Name</b> | QTOF                            |
| <b>User Name</b>   | SYSTEM (SYSTEM)                 | <b>Inj Vol</b>                | 5       | <b>InjPosition</b>     |                                 |
| <b>Sample Type</b> | Sample                          | <b>IRM Calibration Status</b> | Success | <b>Data Filename</b>   | sf6325.d                        |
| <b>ACQ Method</b>  | DIRECT MASS_POSITIVE_100_1500.m | <b>Comment</b>                |         | <b>Acquired Time</b>   | 12-07-2023 15:14:28 (UTC+05:30) |

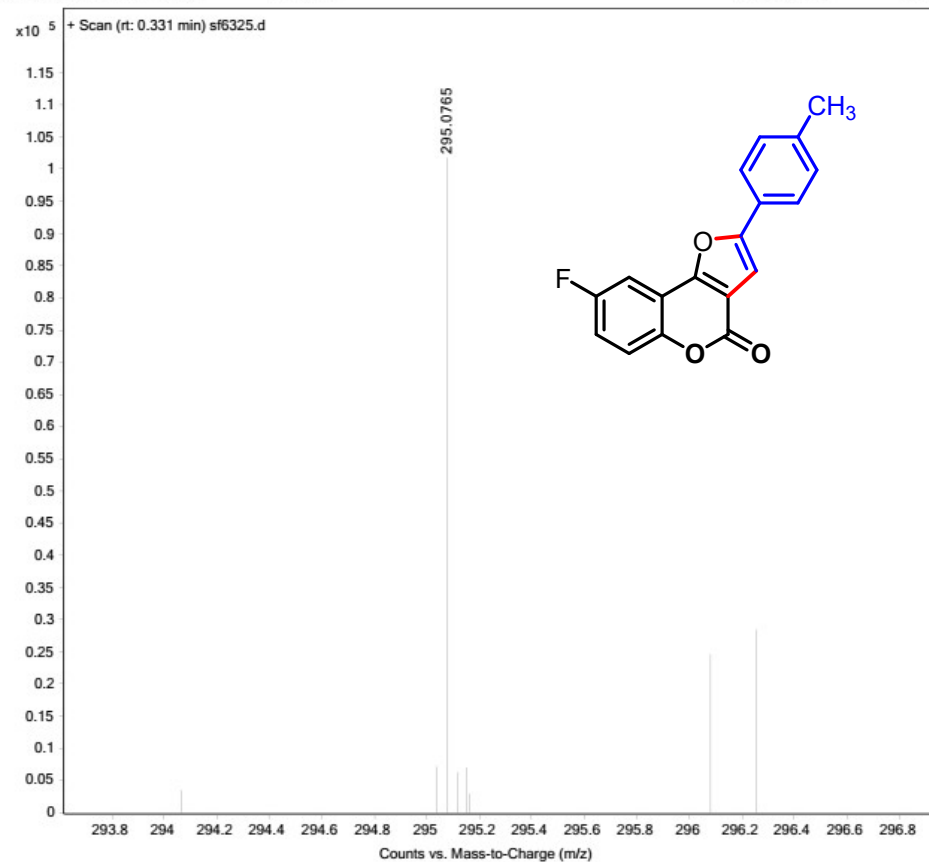

# <sup>1</sup>H NMR Spectrum of 2-(4-Fluorophenyl)-7-hydroxy-4H-furo[3,2-c]chromen-4-one (3x)

SF-400-4FS-2-1H.1.fid — 1H

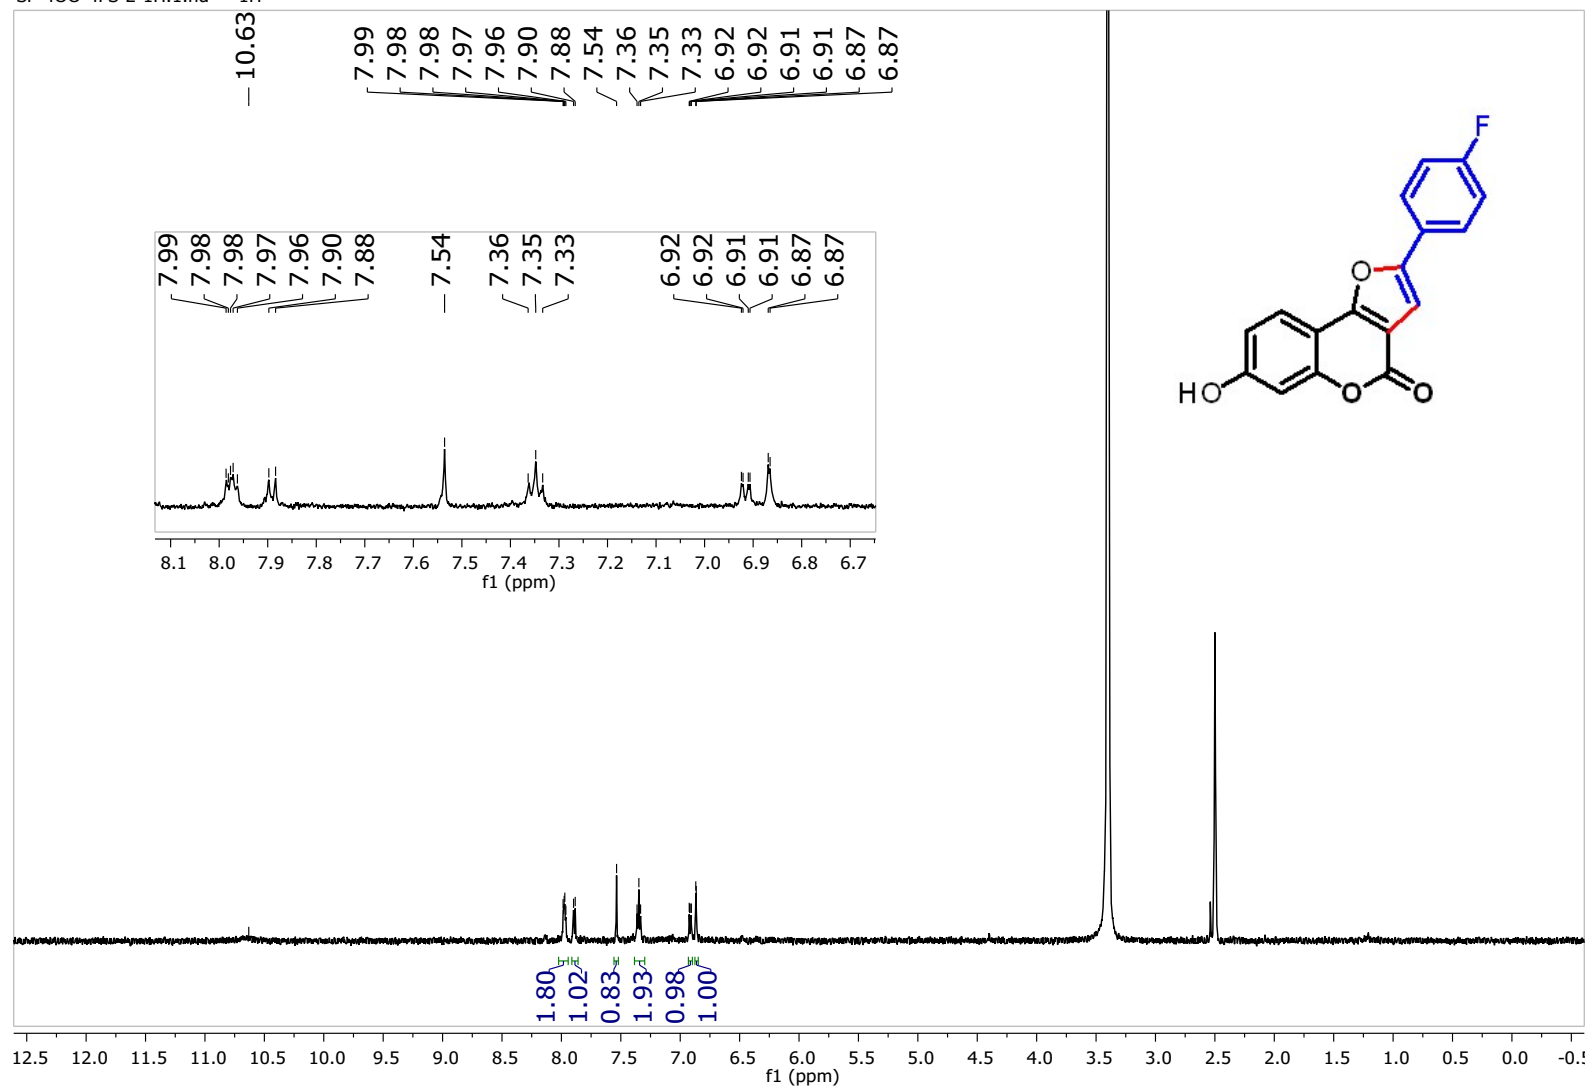

**<sup>13</sup>C NMR Spectrum of 2-(4-Fluorophenyl)-7-hydroxy-4*H*-furo[3,2-*c*]chromen-4-one (3x)**

SF-400-4FS-2-RE-13C.5.fid — 13C

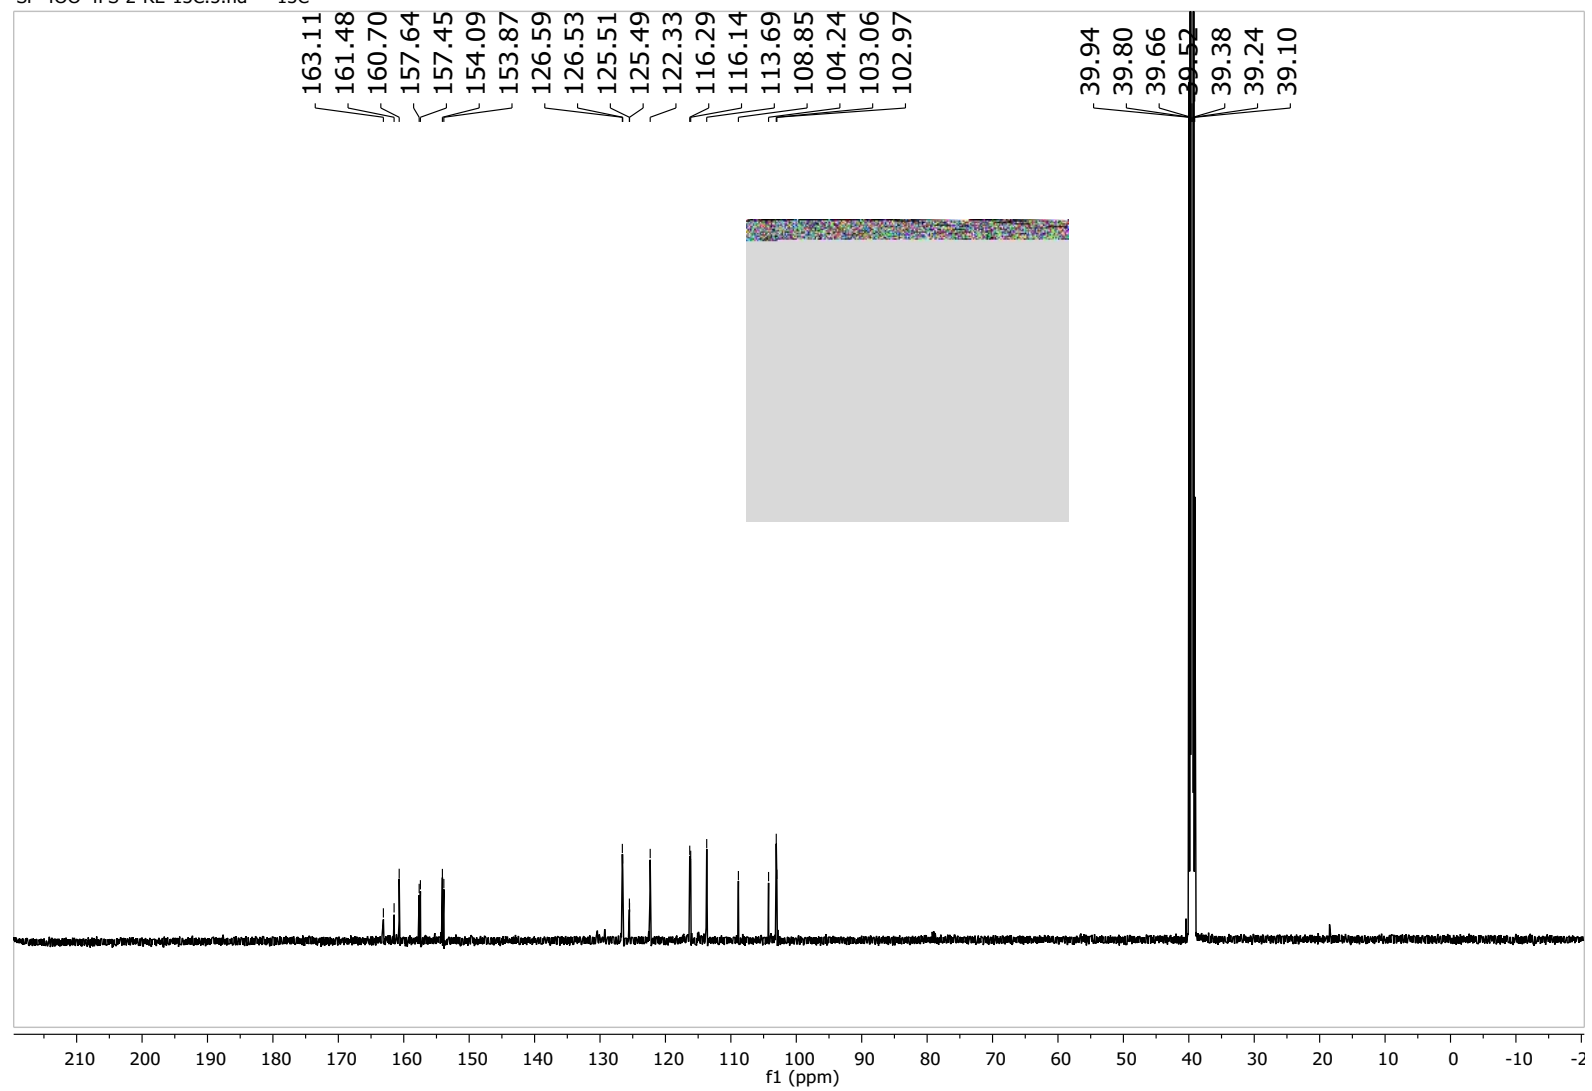



**<sup>19</sup>F NMR Spectrum of 2-(4-Fluorophenyl)-7-hydroxy-4*H*-furo[3,2-*c*]chromen-4-one (3x)**

SF-400-4FS-2-RE-19F.3.fid — 19F

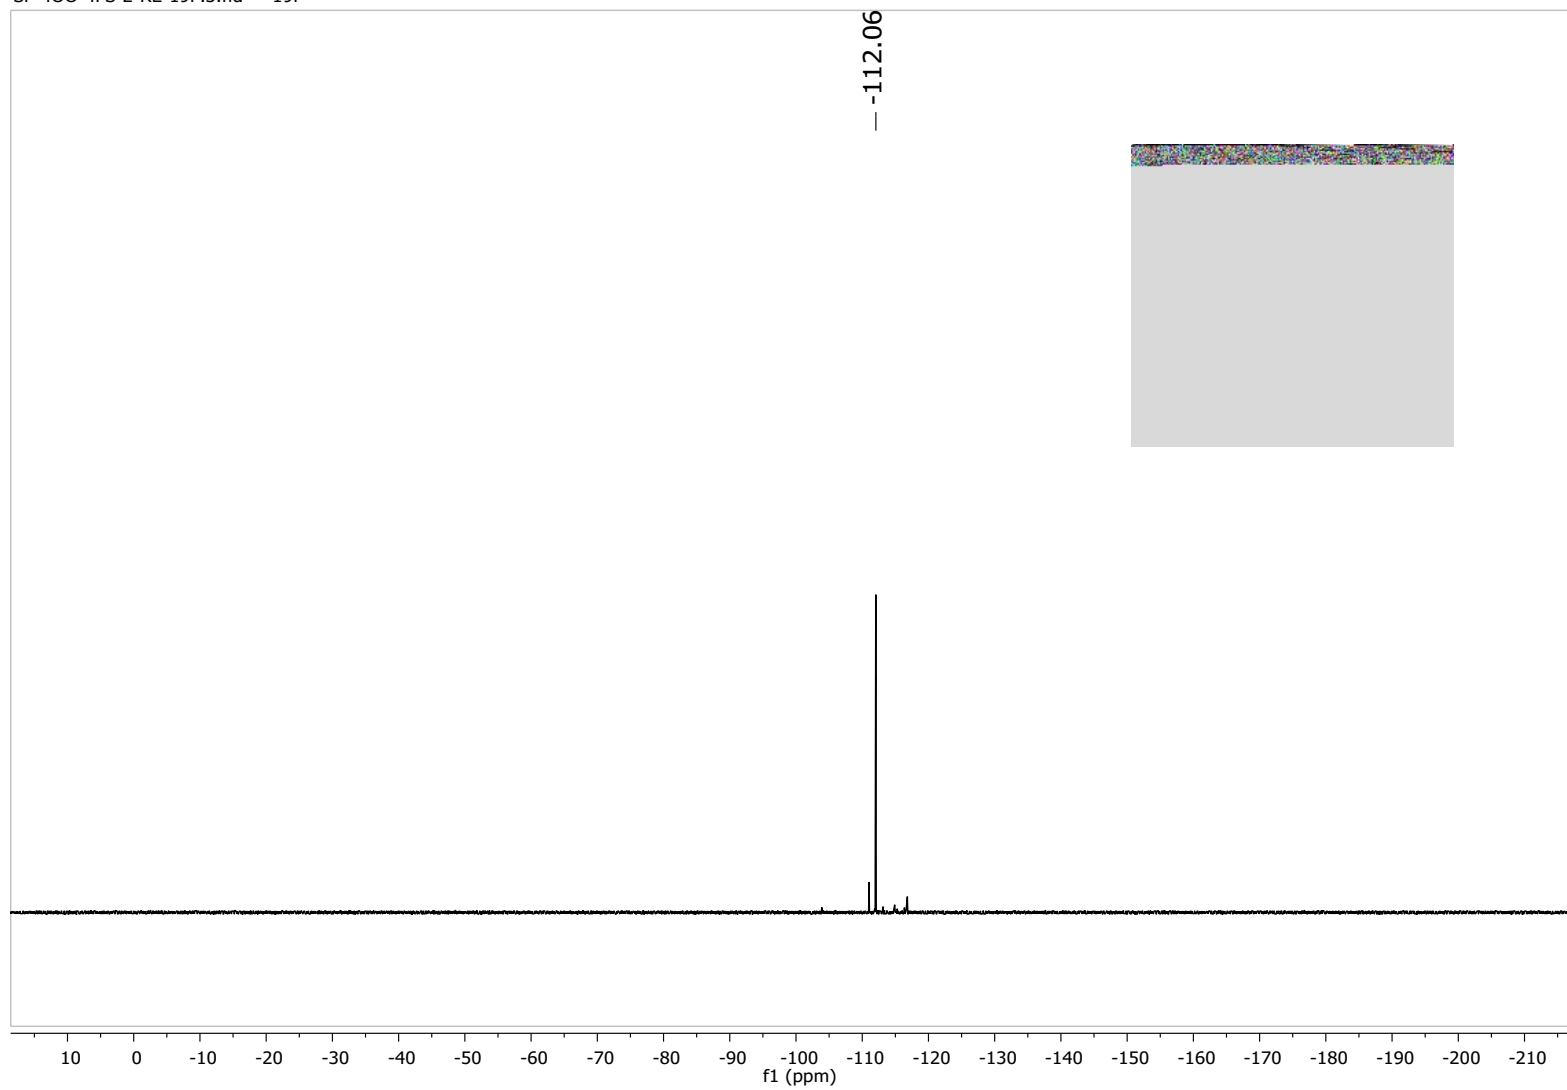

# HRMS Spectrum of 2-(4-Fluorophenyl)-7-hydroxy-4H-furo[3,2-c]chromen-4-one (3x)

|                    |                             |                               |         |                        |                                 |
|--------------------|-----------------------------|-------------------------------|---------|------------------------|---------------------------------|
| <b>Sample Name</b> |                             | <b>Position</b>               | P1-A11  | <b>Instrument Name</b> | QTOF                            |
| <b>User Name</b>   | SYSTEM (SYSTEM)             | <b>Inj Vol</b>                | 5       | <b>InjPosition</b>     |                                 |
| <b>Sample Type</b> | Sample                      | <b>IRM Calibration Status</b> | Success | <b>Data Filename</b>   | RFK31.d                         |
| <b>ACQ Method</b>  | DIRECT MASS_POSITIVE_01_1.m | <b>Comment</b>                |         | <b>Acquired Time</b>   | 01-08-2023 15:46:34 (UTC+05:30) |

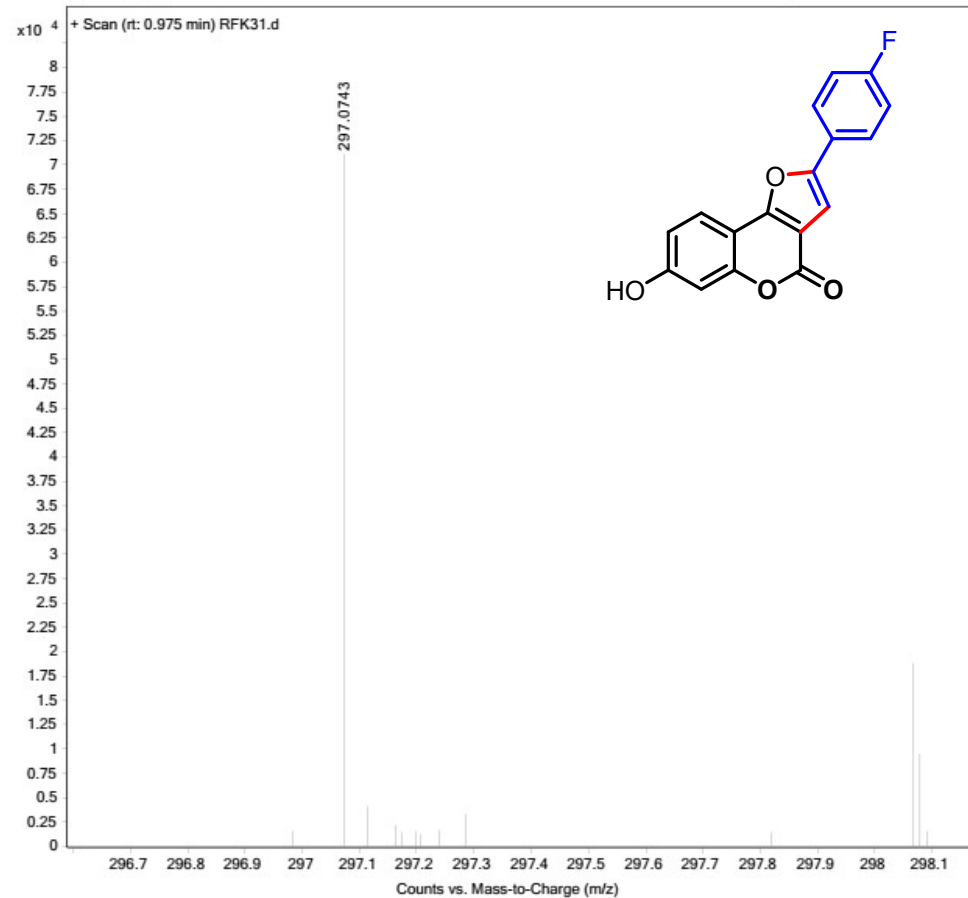

# <sup>1</sup>H NMR Spectrum of 2-(4-Chlorophenyl)-7-hydroxy-4H-furo[3,2-c]chromen-4-one (3y)

SF-400-4UST-U-1H.1.fid — 1H

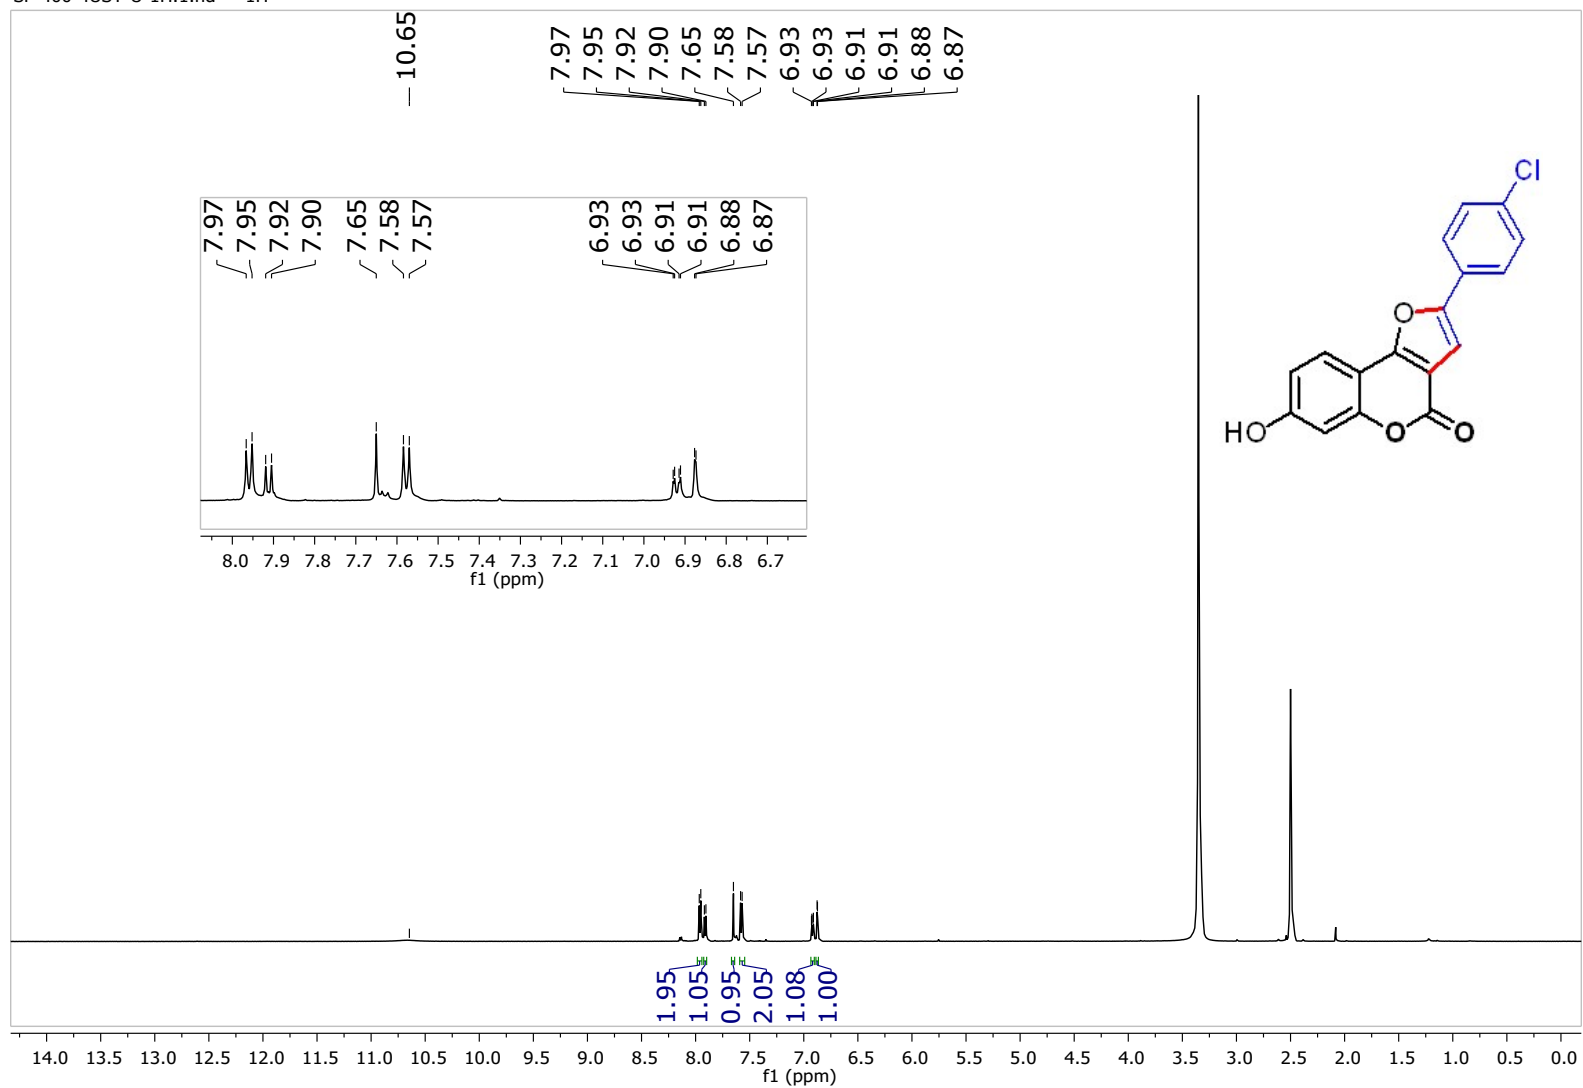

**<sup>13</sup>C NMR Spectrum of 2-(4-Chlorophenyl)-7-hydroxy-4*H*-furo[3,2-*c*]chromen-4-one (3y)**

SF-400-4UST-U-13C.1.fid - 13C

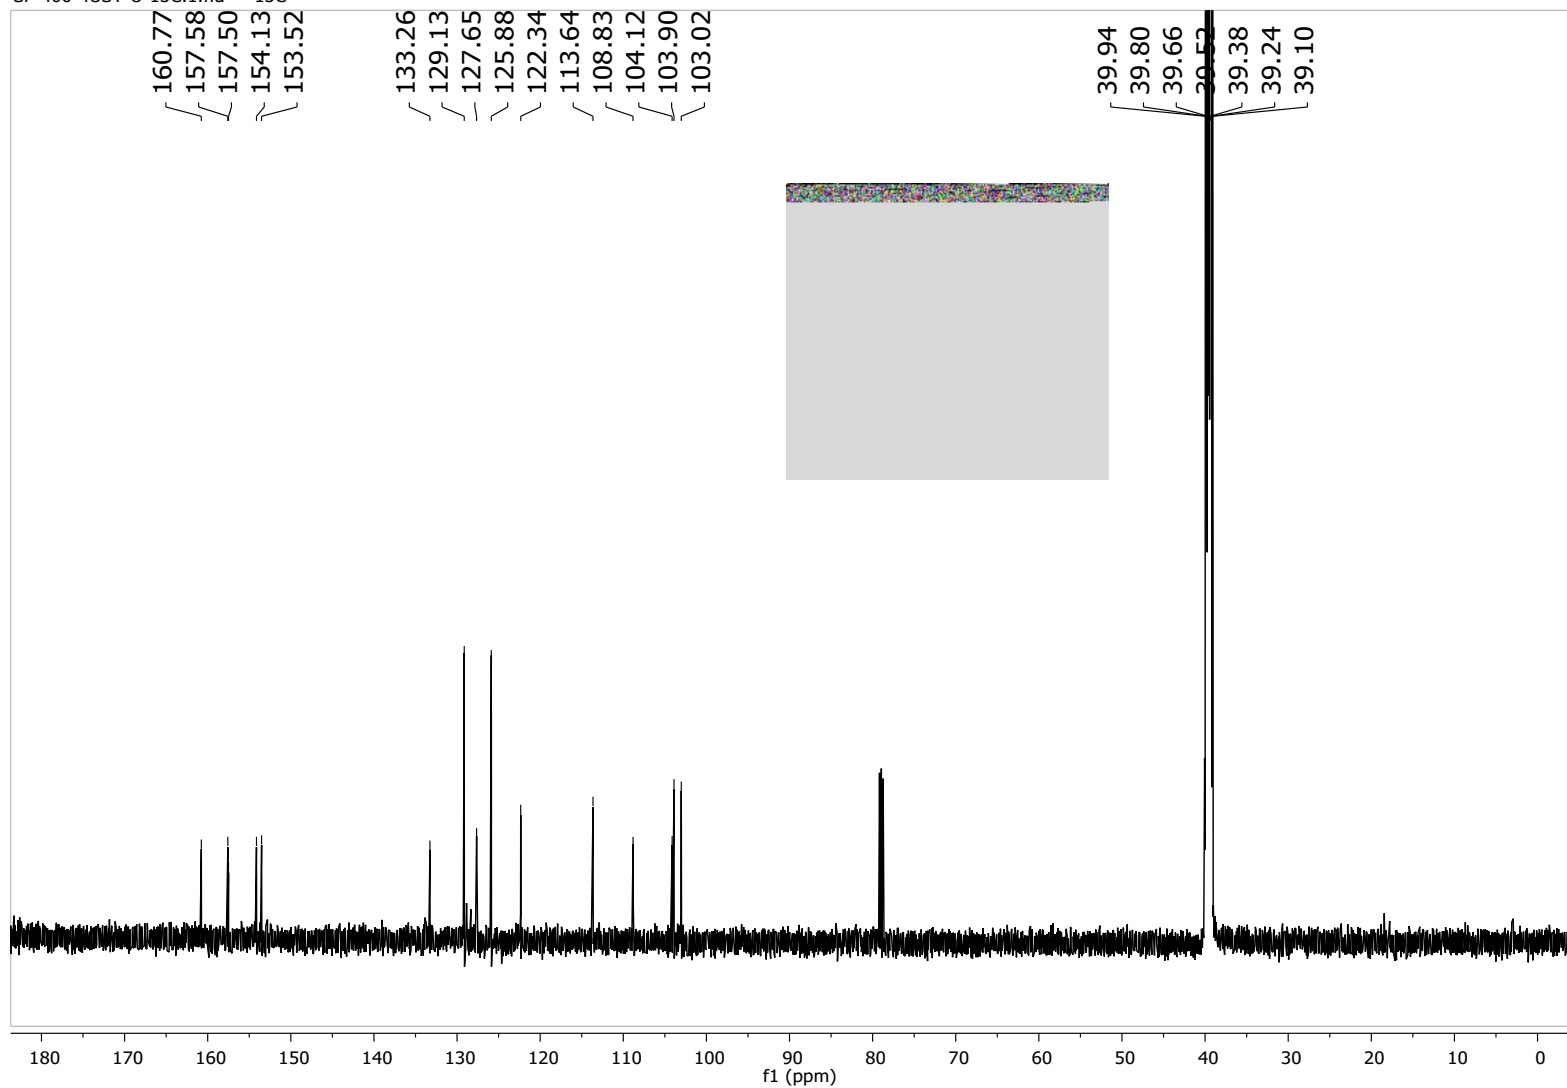

## HRMS Spectrum of 2-(4-Chlorophenyl)-7-hydroxy-4*H*-furo[3,2-*c*]chromen-4-one (3y)

|                    |                                 |                               |         |                        |                                 |
|--------------------|---------------------------------|-------------------------------|---------|------------------------|---------------------------------|
| <b>Sample Name</b> | Sample27                        | <b>Position</b>               | P1-C5   | <b>Instrument Name</b> | QTOF                            |
| <b>User Name</b>   | SYSTEM (SYSTEM)                 | <b>Inj Vol</b>                | 5       | <b>InjPosition</b>     |                                 |
| <b>Sample Type</b> | Sample                          | <b>IRM Calibration Status</b> | Success | <b>Data Filename</b>   | SFK-292.d                       |
| <b>ACQ Method</b>  | DIRECT MASS_POSITIVE_100_1500.m | <b>Comment</b>                |         | <b>Acquired Time</b>   | 03-07-2023 10:38:16 (UTC+05:30) |

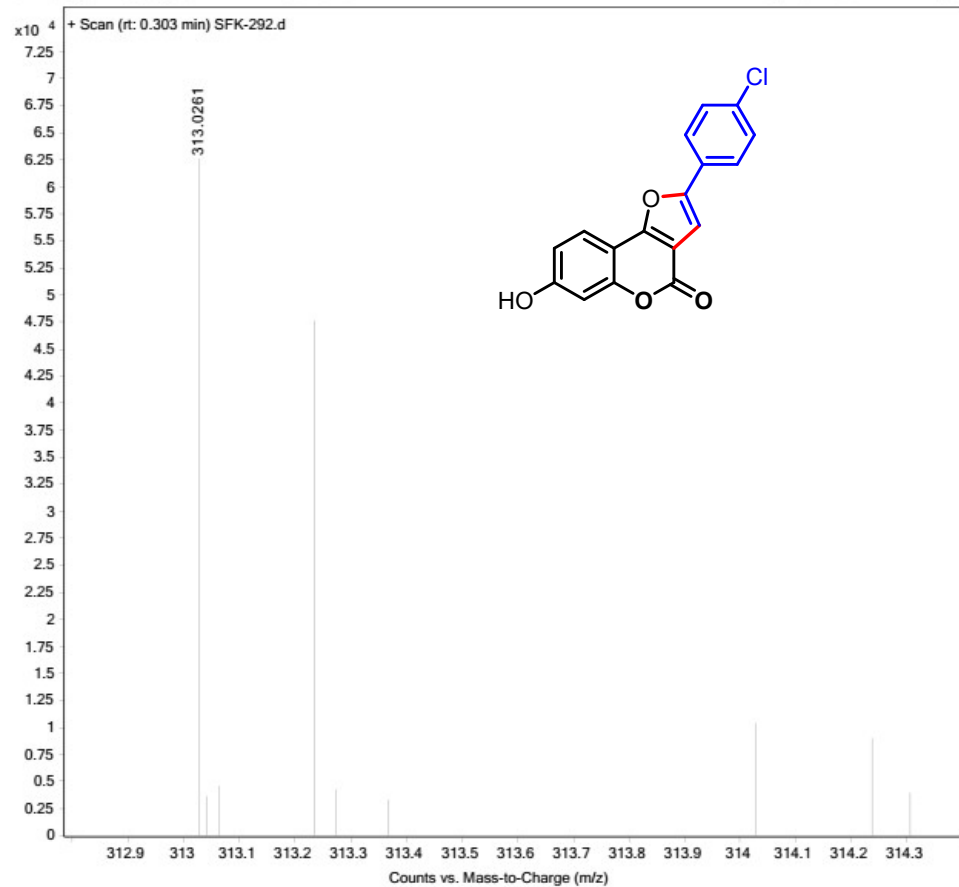

# <sup>1</sup>H NMR Spectrum of 7-Hydroxy-2-(*p*-tolyl)-4*H*-furo[3,2-*c*]chromen-4-one (3z)

SF-4CLOH-ME-U-1H.1.fid — 1H

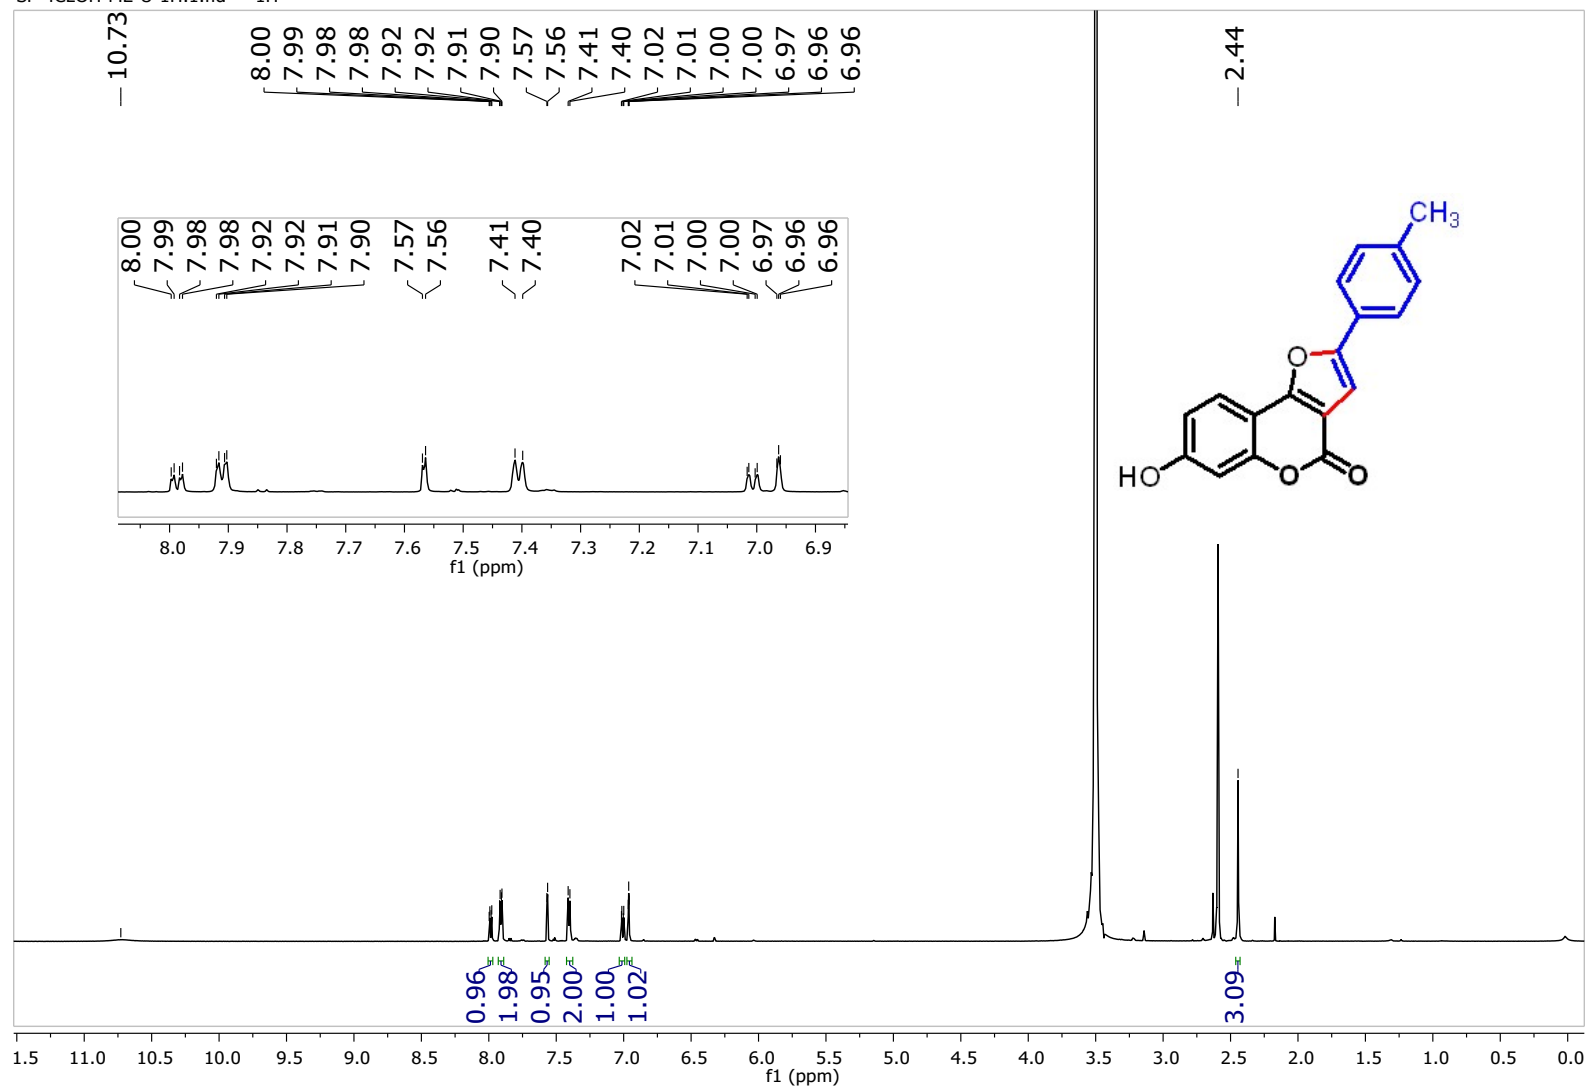

**<sup>13</sup>C NMR Spectrum of 7-Hydroxy-2-(*p*-tolyl)-4*H*-furo[3,2-*c*]chromen-4-one (3z)**

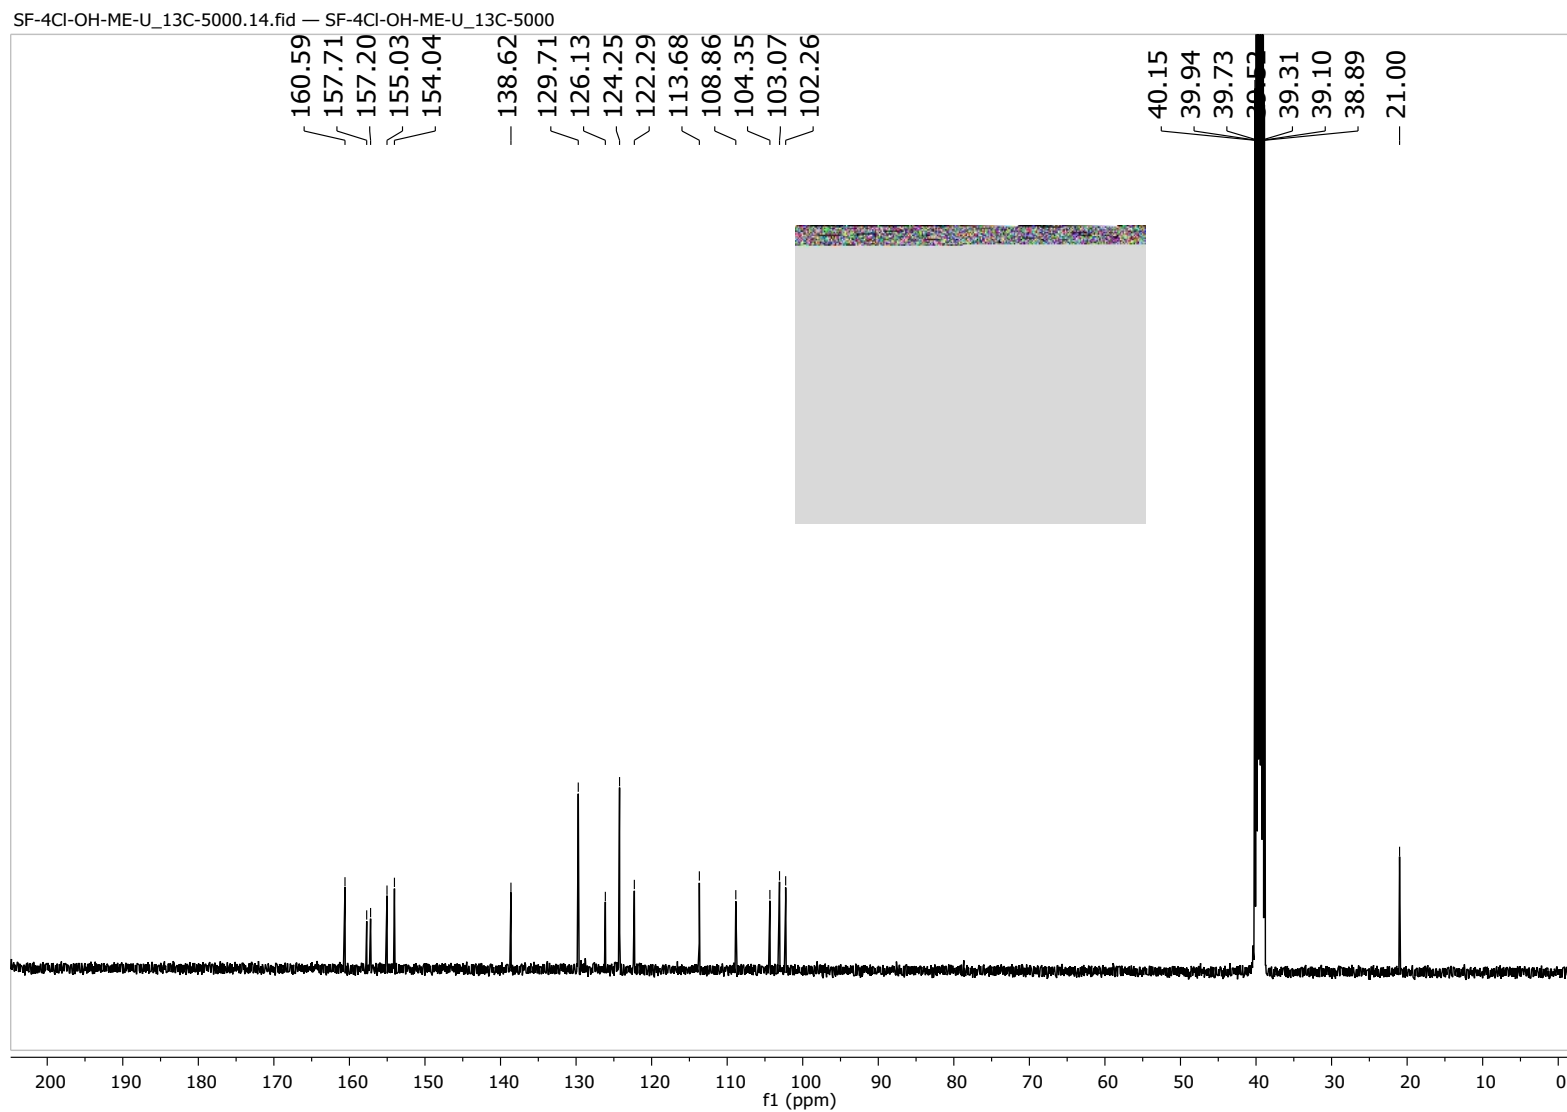

## HRMS Spectrum of 7-Hydroxy-2-(*p*-tolyl)-4*H*-furo[3,2-*c*]chromen-4-one (3z)

|                    |                             |                               |         |                        |                                 |
|--------------------|-----------------------------|-------------------------------|---------|------------------------|---------------------------------|
| <b>Sample Name</b> |                             | <b>Position</b>               | P1-A3   | <b>Instrument Name</b> | QTOF                            |
| <b>User Name</b>   | SYSTEM (SYSTEM)             | <b>Inj Vol</b>                | 5       | <b>InjPosition</b>     |                                 |
| <b>Sample Type</b> | Sample                      | <b>IRM Calibration Status</b> | Success | <b>Data Filename</b>   | SF6C11.d                        |
| <b>ACQ Method</b>  | DIRECT MASS_POSITIVE_01_1.m | <b>Comment</b>                |         | <b>Acquired Time</b>   | 18-07-2023 16:12:02 (UTC+05:30) |

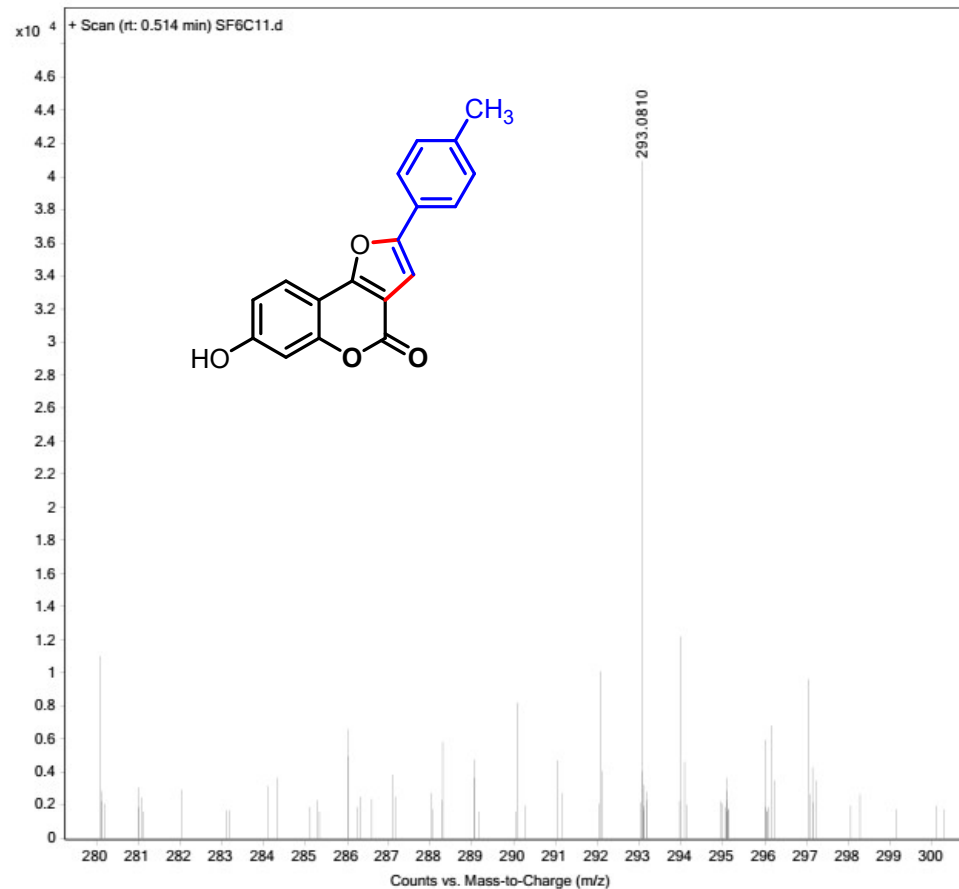



# <sup>1</sup>H NMR Spectrum of 2-(Naphthalen-2-yl)-4H-furo[3,2-c]chromen-4-one (4a)

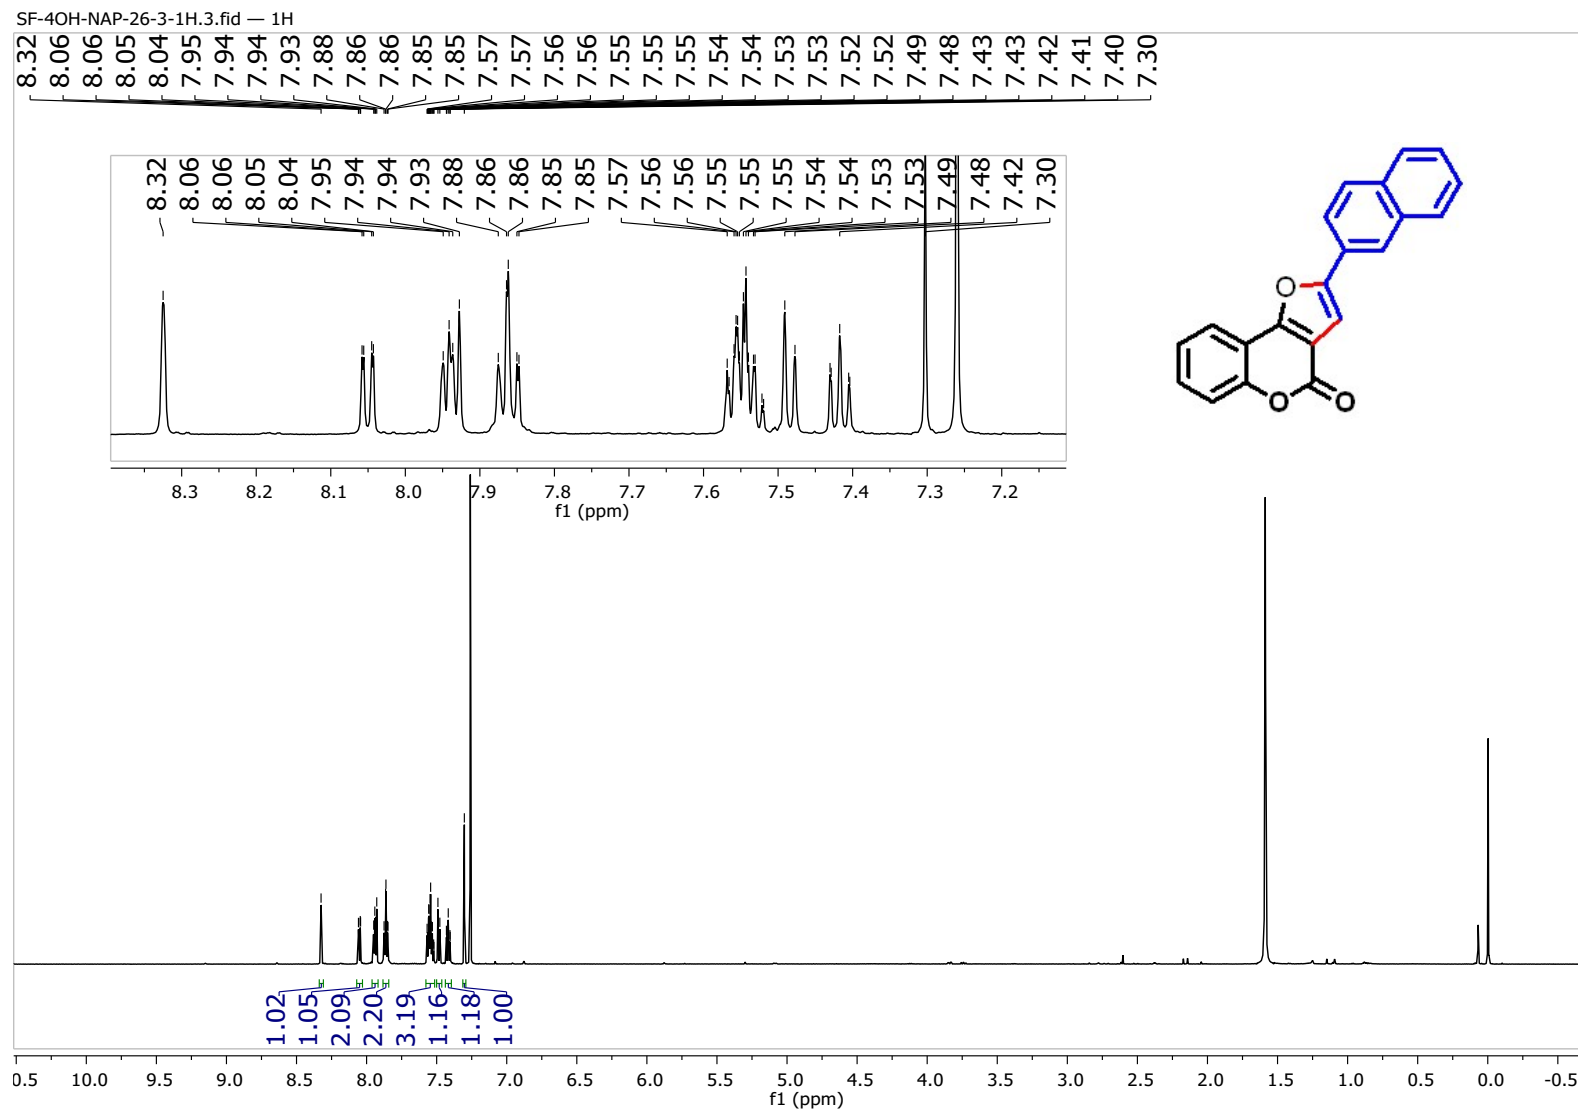

**<sup>13</sup>C NMR Spectrum of 2-(Naphthalen-2-yl)-4*H*-furo[3,2-*c*]chromen-4-one (4a)**

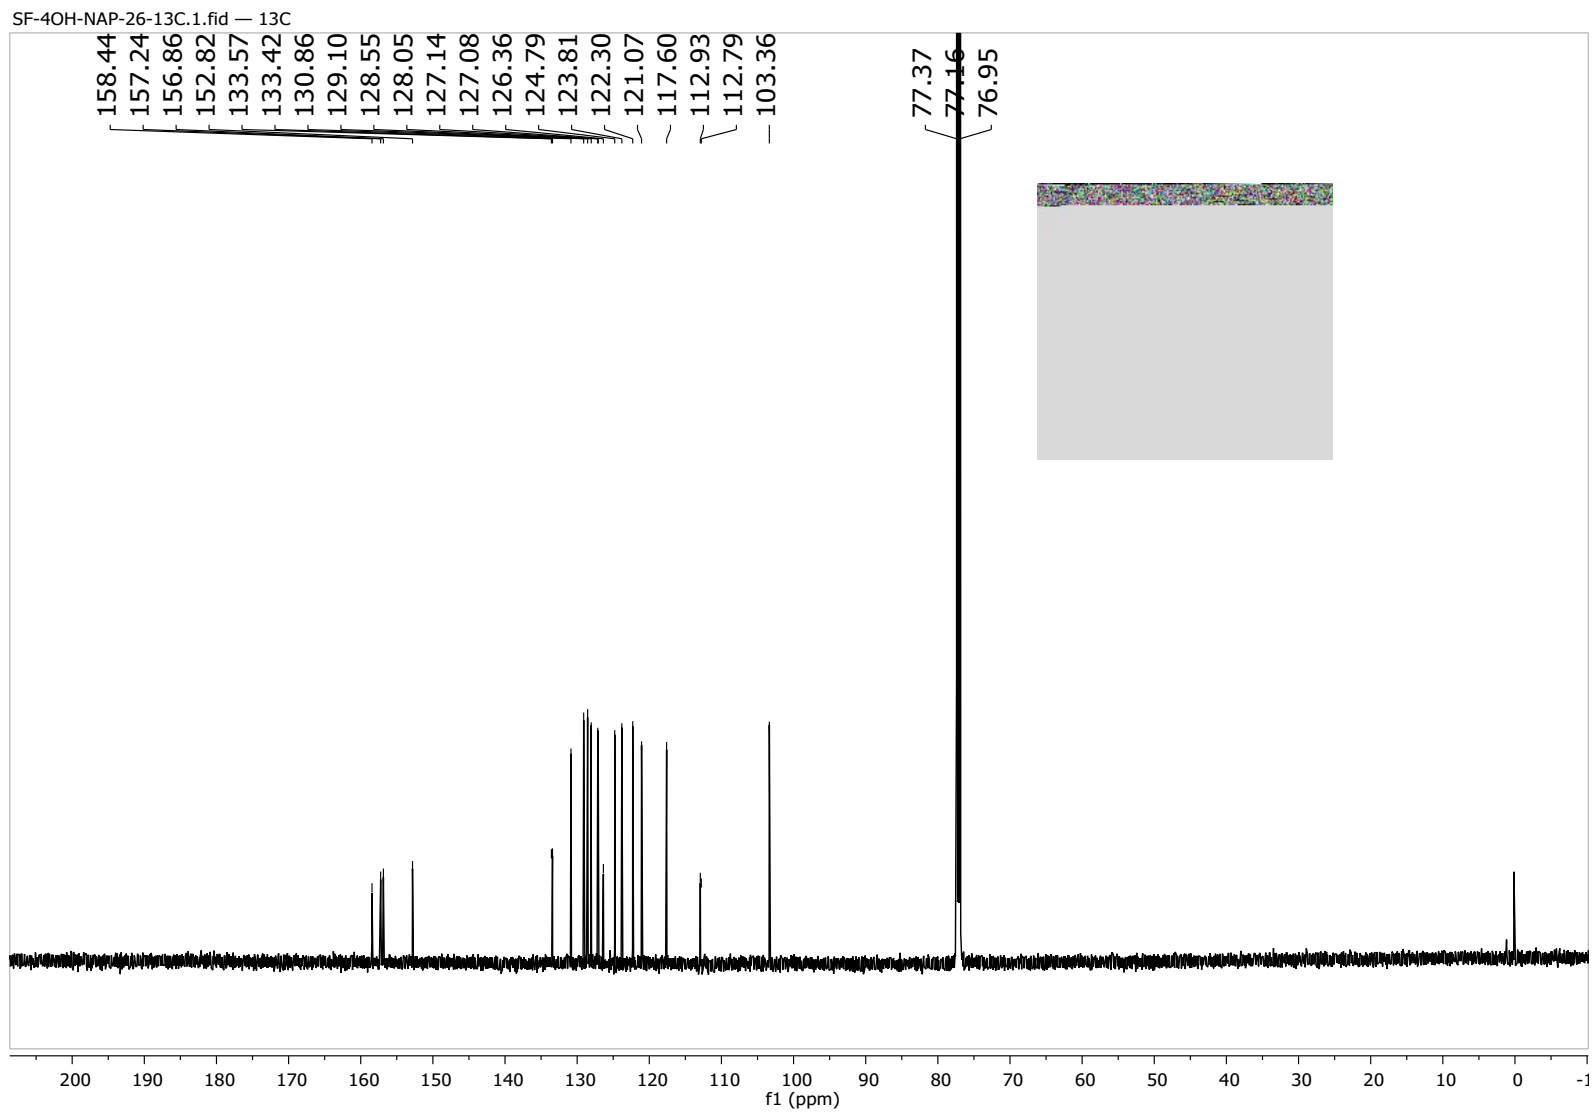

## HRMS Spectrum of 2-(Naphthalen-2-yl)-4*H*-furo[3,2-*c*]chromen-4-one (4a)

|                    |                             |                               |         |                        |                                 |
|--------------------|-----------------------------|-------------------------------|---------|------------------------|---------------------------------|
| <b>Sample Name</b> | Sample2                     | <b>Position</b>               | P1-A2   | <b>Instrument Name</b> | QTOF                            |
| <b>User Name</b>   | SYSTEM (SYSTEM)             | <b>Inj Vol</b>                | 5       | <b>InjPosition</b>     |                                 |
| <b>Sample Type</b> | Sample                      | <b>IRM Calibration Status</b> | Success | <b>Data Filename</b>   | SF28RJ6.d                       |
| <b>ACQ Method</b>  | DIRECT MASS_POSITIVE_01_1.m | <b>Comment</b>                |         | <b>Acquired Time</b>   | 13-10-2023 14:48:25 (UTC+05:30) |

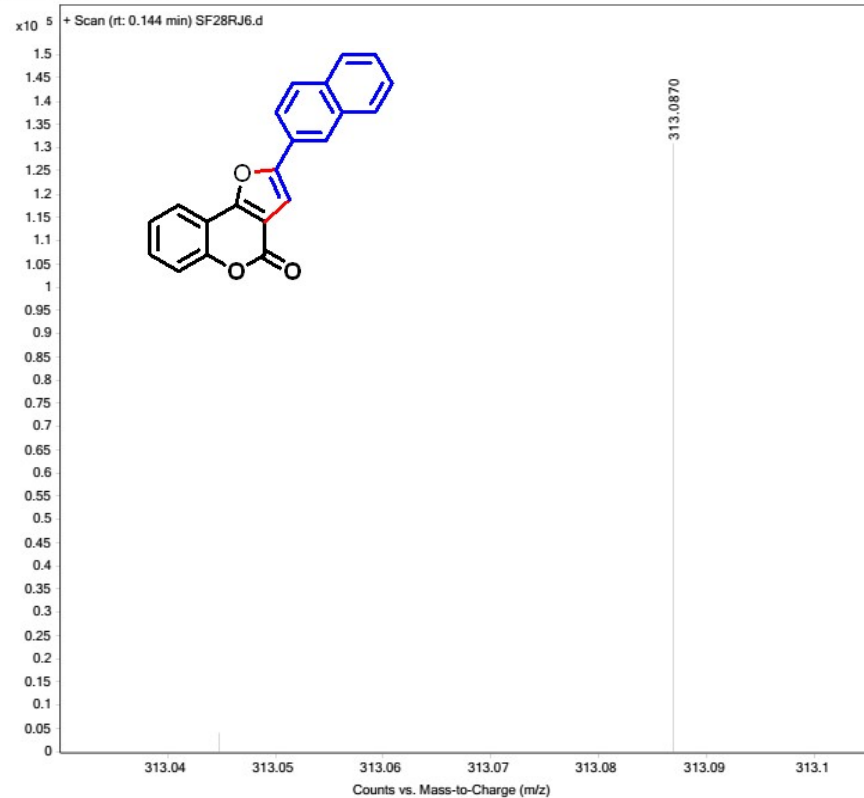

# <sup>1</sup>H NMR Spectrum of 8-Fluoro-2-(naphthalen-2-yl)-4H-furo[3,2-c]chromen-4-one (4b)

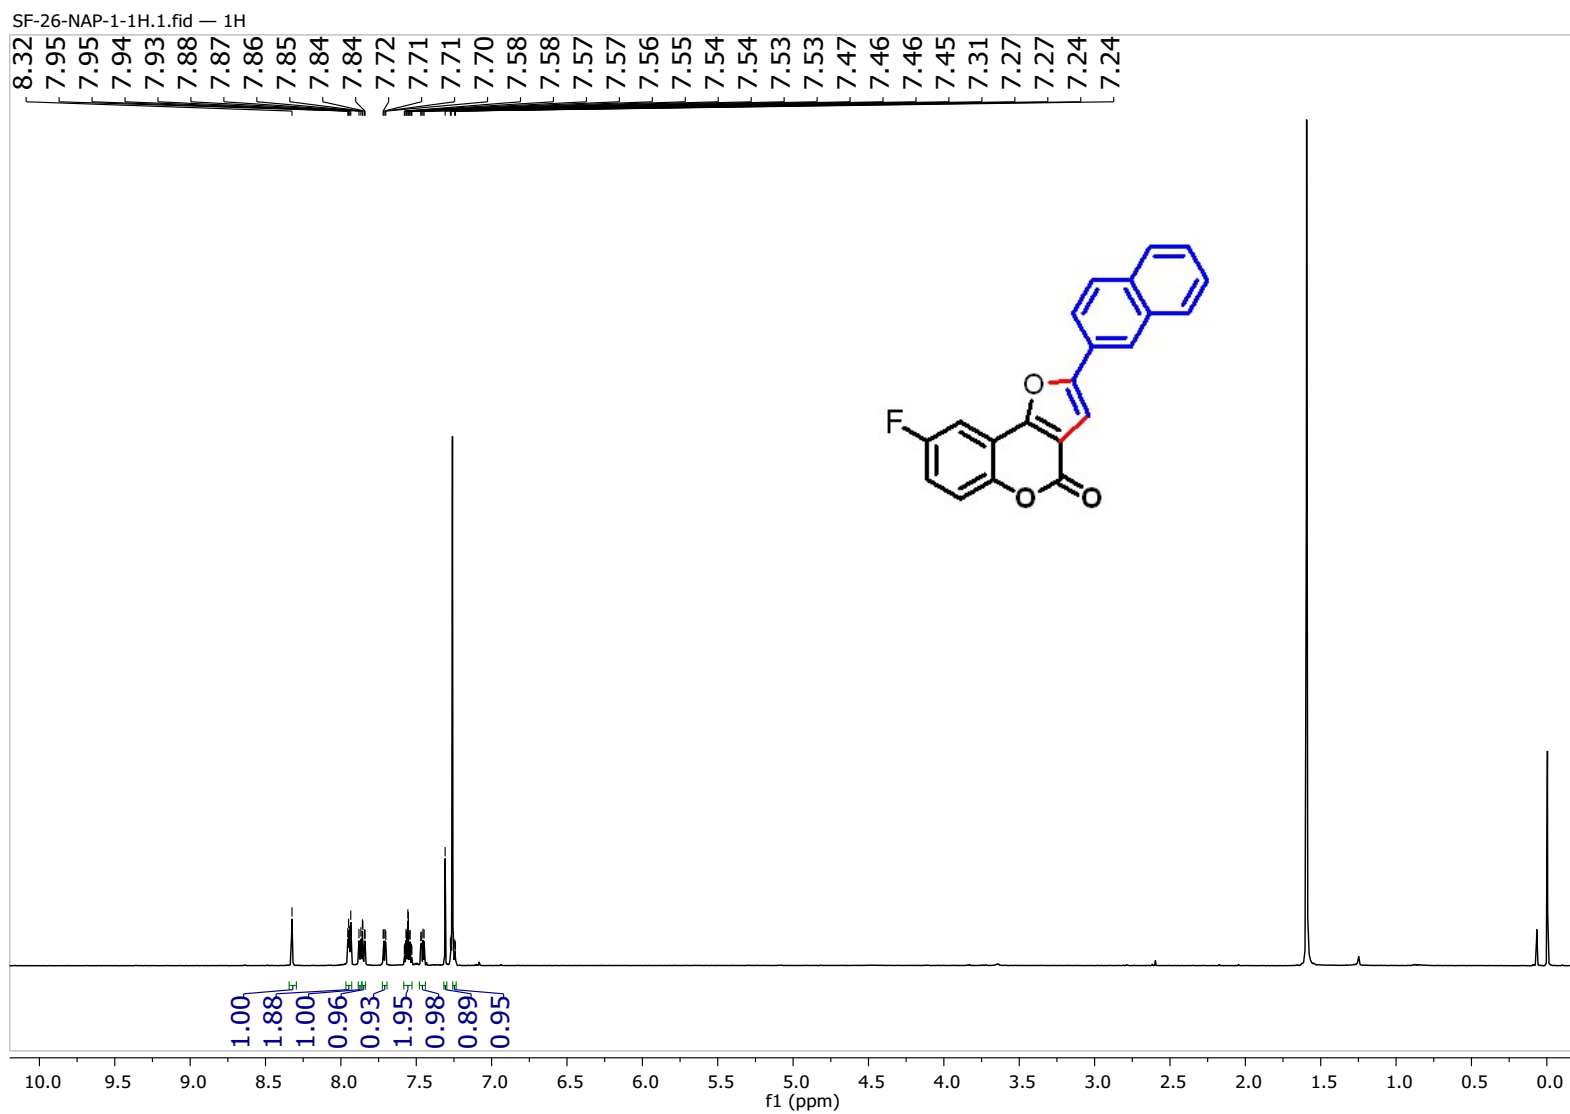

**<sup>13</sup>C NMR Spectrum of 8-Fluoro-2-(naphthalen-2-yl)-4H-furo[3,2-c]chromen-4-one (4b)**

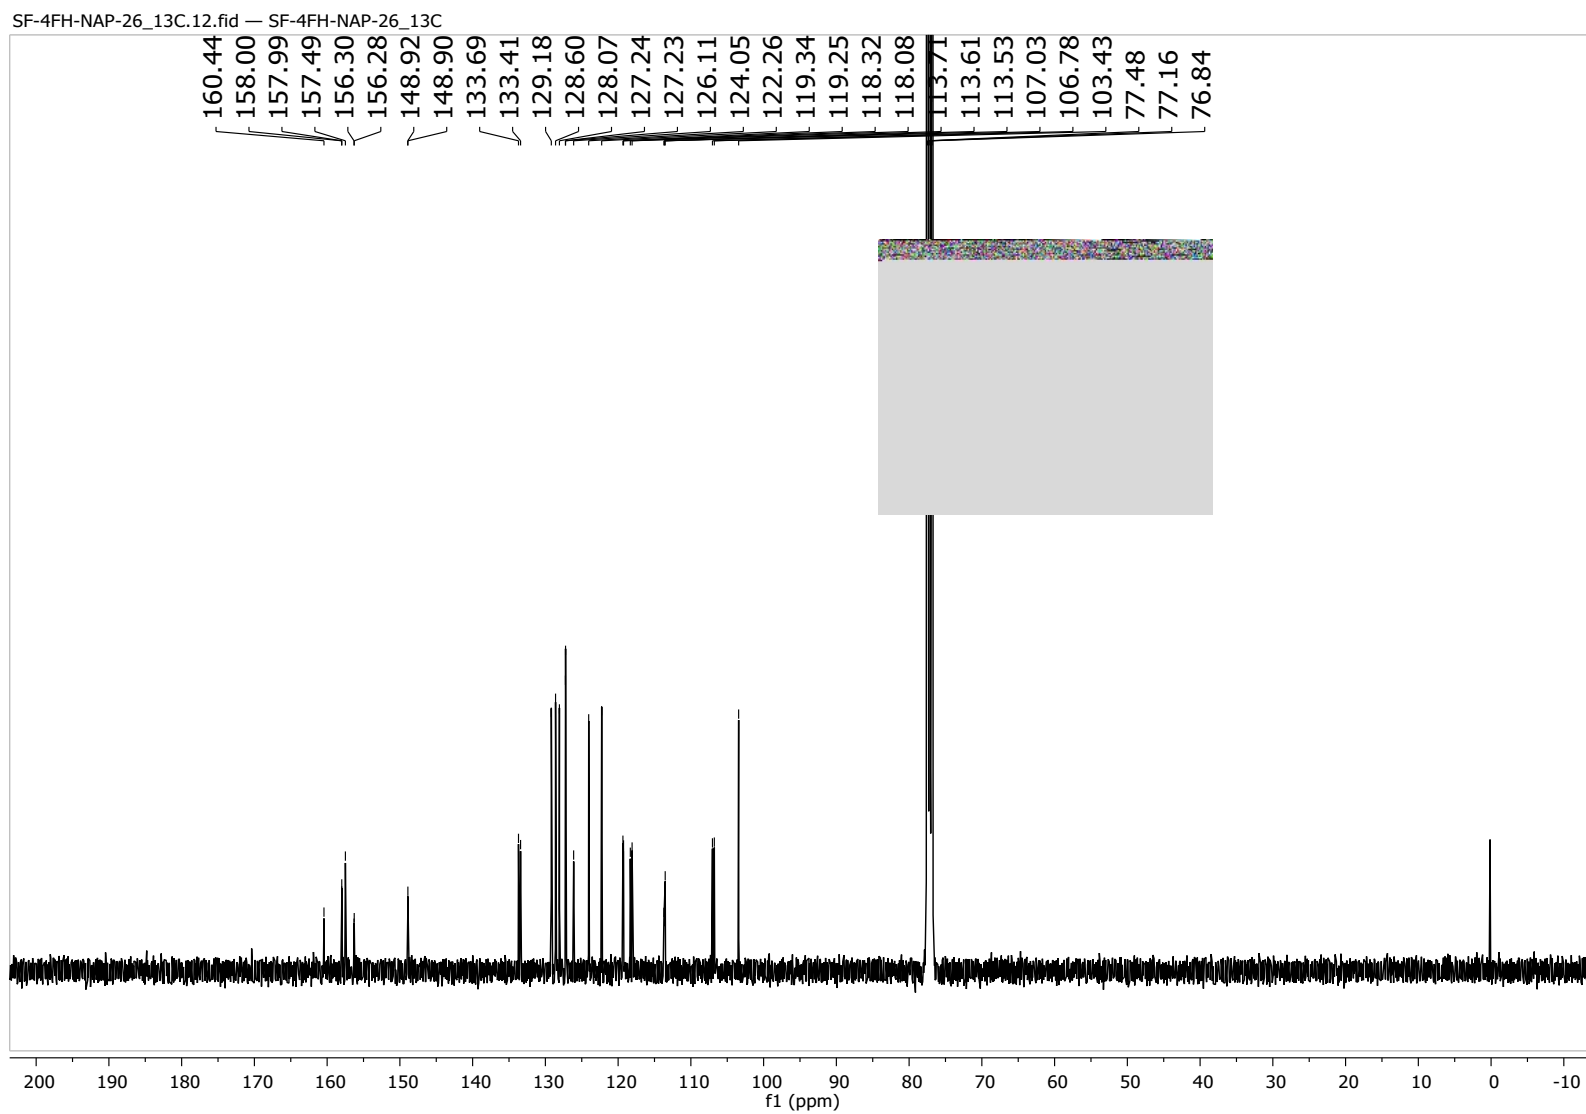

**<sup>19</sup>F NMR Spectrum of 8-Fluoro-2-(naphthalen-2-yl)-4H-furo[3,2-c]chromen-4-one (4b)**

SF-4FH-NAP-26\_19F.14.fid — SF-4FH-NAP-26\_19F

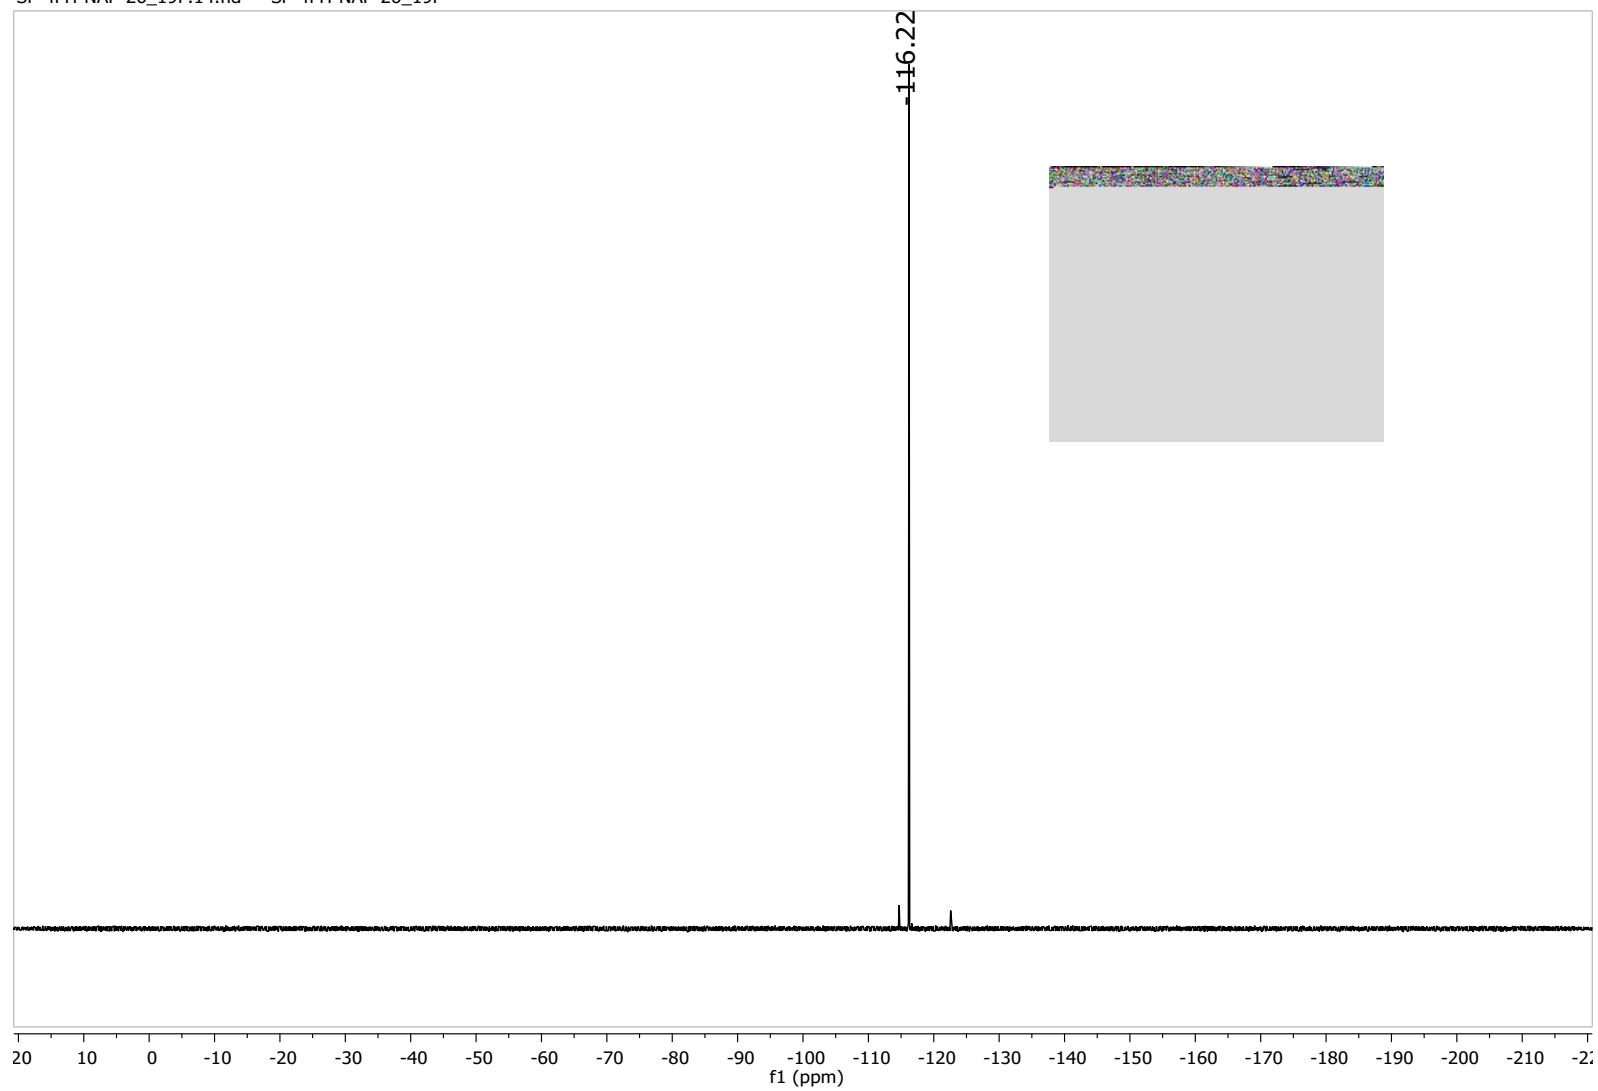

# HRMS Spectrum of 8-Fluoro-2-(naphthalen-2-yl)-4H-furo[3,2-c]chromen-4-one (4b)

|             |                             |                        |         |                 |                                 |
|-------------|-----------------------------|------------------------|---------|-----------------|---------------------------------|
| Sample Name | Sample13                    | Position               | P1-B1   | Instrument Name | QTOF                            |
| User Name   | SYSTEM (SYSTEM)             | Inj Vol                | 5       | InjPosition     |                                 |
| Sample Type | Sample                      | IRM Calibration Status | Success | Data Filename   | SF26RJ-2.d                      |
| ACQ Method  | DIRECT MASS_POSITIVE_01_1.m | Comment                |         | Acquired Time   | 17-10-2023 10:33:40 (UTC+05:30) |

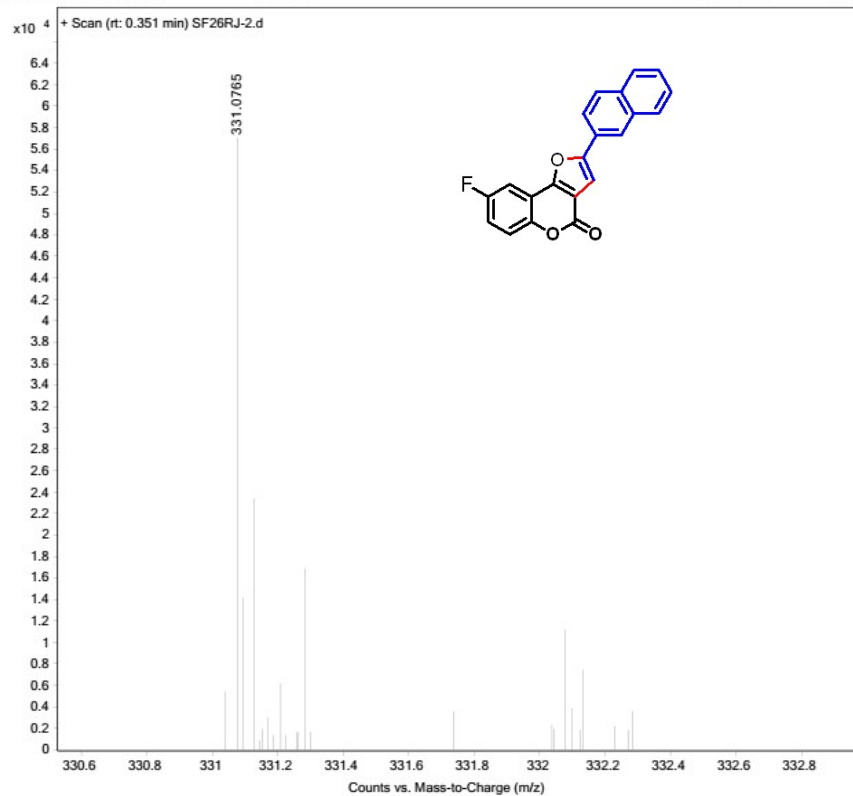

Supplement: d3ob01721d1.pdf [file d3ob01721d1.pdf]
